# Supplementary material for: Blood platelet RNA enables the detection of multiple sclerosis
Source: Mult Scler J Exp Transl Clin. 2020 Jul 30;6(3):2055217320946784. doi: 10.1177/2055217320946784 (PMC7418262; doi:10.1177/2055217320946784)
Supplement: sj-xlsx-1-mso-10.1177_2055217320946784 - Supplemental material for Blood platelet RNA enables the detection of multiple sclerosis [file sj-xlsx-1-mso-10.1177_2055217320946784.xlsx]

## Sheet: Table S1
Table S1 - Patient characteristics
Index	Sample name	Patient group	Storage time	Age	Gender	Treatment	new MRI lesions	EDSS	Cohort
1	Vumc-HD-101	Healthy control	<12h	35	F	NA	NA	NA	Validation
2	Vumc-HD-103	Healthy control	<12h	54	F	NA	NA	NA	Evaluation
3	Vumc-HD-127	Healthy control	<12h	52	F	NA	NA	NA	Validation
4	Vumc-HD-142	Healthy control	<12h	48	F	NA	NA	NA	Training
5	Vumc-HD-145	Healthy control	<12h	38	F	NA	NA	NA	Training
6	Vumc-HD-149	Healthy control	<12h	39	F	NA	NA	NA	Validation
7	Vumc-HD-151	Healthy control	<12h	42	F	NA	NA	NA	Evaluation
8	Vumc-HD-155	Healthy control	<12h	42	F	NA	NA	NA	Training
9	Vumc-HD-156	Healthy control	<12h	42	F	NA	NA	NA	Validation
10	Vumc-HD-56	Healthy control	<12h	47	F	NA	NA	NA	Validation
11	Vumc-HD-60	Healthy control	<12h	44	F	NA	NA	NA	Validation
12	Vumc-HD-63	Healthy control	<12h	49	F	NA	NA	NA	Validation
13	Vumc-HD-73	Healthy control	<12h	40	F	NA	NA	NA	Training
14	Vumc-HD-74	Healthy control	<12h	60	F	NA	NA	NA	Evaluation
15	Vumc-HD-80	Healthy control	<12h	39	F	NA	NA	NA	Training
16	Vumc-HD-81	Healthy control	<12h	40	F	NA	NA	NA	Validation
17	Vumc-HD-86	Healthy control	<12h	45	F	NA	NA	NA	Validation
18	Vumc-HD-89	Healthy control	<12h	45	F	NA	NA	NA	Training
19	Vumc-HD-92	Healthy control	<12h	36	F	NA	NA	NA	Validation
20	Vumc-HD-104	Healthy control	<12h	34	M	NA	NA	NA	Training
21	Vumc-HD-106	Healthy control	<12h	56	M	NA	NA	NA	Validation
22	Vumc-HD-115	Healthy control	<12h	29	F	NA	NA	NA	Training
23	Vumc-HD-117	Healthy control	<12h	35	M	NA	NA	NA	Evaluation
24	Vumc-HD-119	Healthy control	<12h	32	F	NA	NA	NA	Validation
25	Vumc-HD-120	Healthy control	<12h	33	F	NA	NA	NA	Evaluation
26	Vumc-HD-125	Healthy control	<12h	34	M	NA	NA	NA	Evaluation
27	Vumc-HD-141	Healthy control	<12h	41	M	NA	NA	NA	Evaluation
28	Vumc-HD-157	Healthy control	<12h	37	M	NA	NA	NA	Training
29	Vumc-HD-16-1	Healthy control	<12h	43	F	NA	NA	NA	Evaluation
30	Vumc-HD-20-1	Healthy control	<12h	46	F	NA	NA	NA	Evaluation
31	Vumc-HD-21-1	Healthy control	<12h	39	F	NA	NA	NA	Training
32	Vumc-HD-22-1	Healthy control	<12h	52	F	NA	NA	NA	Training
33	Vumc-HD-27-2	Healthy control	<12h	36	F	NA	NA	NA	Validation
34	Vumc-HD-3-1	Healthy control	<12h	53	F	NA	NA	NA	Evaluation
35	Vumc-HD-47-1	Healthy control	<12h	49	F	NA	NA	NA	Training
36	Vumc-HD-4	Healthy control	<12h	43	F	NA	NA	NA	Validation
37	Vumc-HD-50-1	Healthy control	<12h	62	F	NA	NA	NA	Evaluation
38	Vumc-HD-51-1	Healthy control	<12h	41	F	NA	NA	NA	Evaluation
39	Vumc-HD-54-1	Healthy control	<12h	64	F	NA	NA	NA	Evaluation
40	Vumc-HD-68	Healthy control	<12h	45	M	NA	NA	NA	Training
41	Vumc-HD-76	Healthy control	<12h	46	M	NA	NA	NA	Evaluation
42	Vumc-HD-77	Healthy control	<12h	63	M	NA	NA	NA	Training
43	Vumc-HD-78	Healthy control	<12h	51	M	NA	NA	NA	Evaluation
44	Vumc-HD-79	Healthy control	<12h	47	M	NA	NA	NA	Training
45	Vumc-HD-82	Healthy control	<12h	59	M	NA	NA	NA	Training
46	Vumc-HD-85	Healthy control	<12h	43	M	NA	NA	NA	Training
47	Vumc-HD-96	Healthy control	<12h	37	M	NA	NA	NA	Validation
48	Vumc-HD-9	Healthy control	<12h	41	F	NA	NA	NA	Validation
49	Vumc-HD-157	Healthy control	<12h	37	M	NA	NA	NA	Evaluation
50	Vumc-HD-161	Healthy control	<12h	68	F	NA	NA	NA	Training
51	Vumc-HD-8	Healthy control	<12h	49	M	NA	NA	NA	Validation
52	Vumc-HD-241	Healthy control	<12h	61	M	NA	NA	NA	Validation
53	Vumc-HD-234	Healthy control	<12h	53	F	NA	NA	NA	Validation
54	Vumc-HD-10-2	Healthy control	<12h	44	M	NA	NA	NA	Validation
55	Vumc-HD-34-1	Healthy control	<12h	57	M	NA	NA	NA	Evaluation
56	Vumc-HD-218	Healthy control	<12h	54	F	NA	NA	NA	Validation
57	Vumc-HD-162	Healthy control	<12h	42	F	NA	NA	NA	Validation
58	Vumc-HD-169	Healthy control	<12h	42	F	NA	NA	NA	Validation
59	Vumc-HD-265	Healthy control	<12h	49	M	NA	NA	NA	Validation
60	Vumc-HD-186	Healthy control	<12h	47	F	NA	NA	NA	Validation
61	Vumc-HD-231	Healthy control	<12h	67	M	NA	NA	NA	Training
62	Vumc-HD-195	Healthy control	<12h	52	F	NA	NA	NA	Evaluation
63	Vumc-HD-239	Healthy control	<12h	48	F	NA	NA	NA	Evaluation
64	Vumc-HD-175	Healthy control	<12h	54	M	NA	NA	NA	Validation
65	Vumc-HD-230	Healthy control	<12h	52	F	NA	NA	NA	Evaluation
66	Vumc-HD-199	Healthy control	<12h	62	F	NA	NA	NA	Validation
67	Vumc-MS-001	Multiple Sclerosis	<12h	39	F	NA	YES	3	Training
68	Vumc-MS-002	Multiple Sclerosis	<12h	57	M	Rebif	NO	3.5	Evaluation
69	Vumc-MS-003	Multiple Sclerosis	<12h	62	M	NA	YES	3	Training
70	Vumc-MS-004	Multiple Sclerosis	<12h	61	F	Avonex	NO	2	Training
71	Vumc-MS-005	Multiple Sclerosis	<12h	43	F	Fingolimod	NO	2.5	Training
72	Vumc-MS-007	Multiple Sclerosis	<12h	39	M	Betaferon	NO	2	Training
73	Vumc-MS-008	Multiple Sclerosis	<12h	40	F	Fingolimod	YES	3.5	Evaluation
74	Vumc-MS-009	Multiple Sclerosis	<12h	47	F	Tysabri	YES	3	Validation
75	Vumc-MS-010	Multiple Sclerosis	<12h	49	F	NA	YES	2	Validation
76	Vumc-MS-011	Multiple Sclerosis	<12h	46	F	Rebif22	NO	3	Training
77	Vumc-MS-013	Multiple Sclerosis	<12h	44	F	Copaxone	YES	4	Validation
78	Vumc-MS-014	Multiple Sclerosis	<12h	37	M	NA	YES	4	Validation
79	Vumc-MS-015	Multiple Sclerosis	<12h	46	F	NA	NO	2.5	Validation
80	Vumc-MS-012	Multiple Sclerosis	<12h	40	F	Betaferon	NO	2.5	Validation
81	Vumc-MS-016	Multiple Sclerosis	<12h	39	F	Rebif	NO	2.5	Evaluation
82	Vumc-MS-017	Multiple Sclerosis	<12h	43	F	Betaferon	NO	4	Evaluation
83	Vumc-MS-018	Multiple Sclerosis	<12h	42	F	NA	YES	2	Training
84	Vumc-MS-019	Multiple Sclerosis	<12h	51	F	NA	YES	4	Evaluation
85	Vumc-MS-025	Multiple Sclerosis	<12h	34	M	NA	NO	2	Validation
86	Vumc-MS-042	Multiple Sclerosis	<12h	41	F	NA	YES	2.5	Validation
87	Vumc-MS-023	Multiple Sclerosis	<12h	42	F	Tysabri	YES	6	Validation
88	Vumc-MS-039	Multiple Sclerosis	<12h	47	M	Tecfidera	NO	3	Validation
89	Vumc-MS-040	Multiple Sclerosis	<12h	35	M	NA	YES	0	Training
90	Vumc-MS-030	Multiple Sclerosis	<12h	68	M	NA	NO	3.5	Training
91	Vumc-MS-032	Multiple Sclerosis	<12h	41	F	NA	NO	2	Evaluation
92	Vumc-MS-021	Multiple Sclerosis	<12h	48	F	NA	NO	3.5	Training
93	Vumc-MS-020	Multiple Sclerosis	<12h	43	F	NA	NO	6.5	Evaluation
94	Vumc-MS-022	Multiple Sclerosis	<12h	45	F	NA	NO	2	Training
95	Vumc-MS-024	Multiple Sclerosis	<12h	42	F	Tecfidera	YES	3	Validation
96	Vumc-MS-037	Multiple Sclerosis	<12h	42	M	NA	YES	3	Training
97	Vumc-MS-027	Multiple Sclerosis	<12h	35	F	Betaferon	YES	4	Training
98	Vumc-MS-029	Multiple Sclerosis	<12h	54	F	Avonex	NO	4	Evaluation
99	Vumc-MS-044	Multiple Sclerosis	<12h	39	F	Rebif	YES	1.5	Evaluation
100	Vumc-MS-031	Multiple Sclerosis	<12h	56	F	NA	NO	2.5	Validation
101	Vumc-MS-034	Multiple Sclerosis	<12h	59	F	NA	YES	3	Validation
102	Vumc-MS-038	Multiple Sclerosis	<12h	61	F	NA	NO	3.5	Training
103	Vumc-MS-041	Multiple Sclerosis	<12h	53	F	Avonex	YES	6.5	Evaluation
104	Vumc-MS-043	Multiple Sclerosis	<12h	49	M	Avonex	YES	3.5	Validation
105	Vumc-MS-045	Multiple Sclerosis	<12h	44	M	NA	YES	3	Validation
106	Vumc-MS-036	Multiple Sclerosis	<12h	48	F	NA	YES	3	Validation
107	Vumc-MS-048	Multiple Sclerosis	<12h	42	F	NA	NO	4	Validation
108	Vumc-MS-026	Multiple Sclerosis	<12h	51	F	NA	YES	4	Evaluation
109	Vumc-MS-049	Multiple Sclerosis	<12h	30	F	Tecfidera	YES	2	Training
110	Vumc-MS-035	Multiple Sclerosis	<12h	49	M	NA	YES	1	Training
111	Vumc-MS-033	Multiple Sclerosis	<12h	61	M	NA	NO	4	Evaluation
112	Vumc-MS-062	Multiple Sclerosis	<12h	42	F	NA	NO	2	Training
113	Vumc-MS-055	Multiple Sclerosis	<12h	47	F	Copaxone	YES	6.5	Evaluation
114	Vumc-MS-050	Multiple Sclerosis	<12h	53	M	Fingolimod	NO	4.5	Validation
115	Vumc-MS-056	Multiple Sclerosis	<12h	52	F	NA	YES	1	Evaluation
116	Vumc-MS-057	Multiple Sclerosis	<12h	68	M	NA	YES	3	Validation
117	Vumc-MS-059	Multiple Sclerosis	<12h	30	M	Tecfidera	YES	2.5	Evaluation
118	Vumc-MS-058	Multiple Sclerosis	<12h	52	M	NA	NO	3	Validation
119	Vumc-MS-054	Multiple Sclerosis	<12h	45	F	Tecfidera	YES	2	Evaluation
120	Vumc-MS-051	Multiple Sclerosis	<12h	32	F	Avonex	NO	0	Validation
121	Vumc-MS-061	Multiple Sclerosis	<12h	52	F	Betaferon	NO	2.5	Validation
122	Vumc-MS-052	Multiple Sclerosis	<12h	49	F	Copaxone	NO	2	Validation
123	Vumc-MS-028	Multiple Sclerosis	<12h	52	F	NA	NO	3	Evaluation

## Sheet: Table S2
Table S2 - Transcripts with differentially expressed splice junction reads in MS versus healthy controls
Ensembl gene ID	HGNC symbol	Description	Chromosome	Band	Strand	Start position	End position	Coding gene size	logFC	logCPM	LR	PValue	FDR
ENSG00000133106	EPSTI1	epithelial stromal interaction 1 (breast) [Source:HGNC Symbol;Acc:16465]	13	q14.11	-1	43460524	43566407	4924	1.59079	6.5341	18.7227	1.51175e-05	0.0727455
ENSG00000109184	DCUN1D4	DCN1, defective in cullin neddylation 1, domain containing 4 [Source:HGNC Symbol;Acc:28998]	4	q12	1	52709166	52783003	7625	1.22747	4.70864	17.0505	3.63983e-05	0.0875742
ENSG00000225972	MTND1P23	MT-ND1 pseudogene 23 [Source:HGNC Symbol;Acc:42092]	1	p36.33	1	564442	564813	372	1.30195	6.70815	16.17	5.79045e-05	0.0928789
ENSG00000126709	IFI6	interferon, alpha-inducible protein 6 [Source:HGNC Symbol;Acc:4054]	1	p36.11	-1	27992572	27998729	865	2.47771	5.28482	15.3145	9.10164e-05	0.109493
ENSG00000225630	MTND2P28	MT-ND2 pseudogene 28 [Source:HGNC Symbol;Acc:42129]	1	p36.33	1	565020	566063	1044	1.35445	5.43028	14.4238	0.00014595	0.136928
ENSG00000156587	UBE2L6	ubiquitin-conjugating enzyme E2L 6 [Source:HGNC Symbol;Acc:12490]	11	q12.1	-1	57319129	57335757	2197	1.22732	5.91385	14.1285	0.000170733	0.136928
ENSG00000269028	MTRNR2L12	MT-RNR2-like 12 (pseudogene) [Source:HGNC Symbol;Acc:37169]	3	q11.2	-1	96335981	96337000	1020	1.44153	8.3266	13.6777	0.000217015	0.149182
ENSG00000247627	MTND4P12	MT-ND4 pseudogene 12 [Source:HGNC Symbol;Acc:42199]	5	q31.1	-1	134262350	134263726	1377	1.35815	5.20882	12.1229	0.000498053	0.299579
ENSG00000244734	HBB	hemoglobin, beta [Source:HGNC Symbol;Acc:4827]	11	p15.4	-1	5246694	5250625	1179	-1.54883	11.084	11.4965	0.000697272	0.308045
ENSG00000171681	ATF7IP	activating transcription factor 7 interacting protein [Source:HGNC Symbol;Acc:20092]	12	p13.1	1	14518610	14651697	8410	0.840496	5.94066	11.45	0.000714953	0.308045
ENSG00000248527	MTATP6P1	mitochondrially encoded ATP synthase 6 pseudogene 1 [Source:HGNC Symbol;Acc:44575]	1	p36.33	1	569076	569756	681	1.1633	5.22106	11.3521	0.00075364	0.308045
ENSG00000271043	MTRNR2L2	MT-RNR2-like 2 [Source:HGNC Symbol;Acc:37156]	5	q14.1	-1	79945819	79946855	1037	1.25152	6.72764	11.0604	0.000881911	0.308045
ENSG00000168710	AHCYL1	adenosylhomocysteinase-like 1 [Source:HGNC Symbol;Acc:344]	1	p13.3	1	110527308	110566357	4736	-0.850234	5.48876	11.0443	0.000889616	0.308045
ENSG00000255823	MTRNR2L8	MT-RNR2-like 8 [Source:HGNC Symbol;Acc:37165]	11	p15.4	-1	10529434	10530723	1290	1.30773	6.2303	11.0306	0.000896225	0.308045
ENSG00000133858	ZFC3H1	zinc finger, C3H1-type containing [Source:HGNC Symbol;Acc:28328]	12	q21.1	-1	72003252	72061505	9670	0.8428	5.83611	10.8916	0.00096603	0.309902
ENSG00000138182	KIF20B	kinesin family member 20B [Source:HGNC Symbol;Acc:7212]	10	q23.31	1	91461367	91534700	7126	0.860153	7.01523	10.6378	0.00110802	0.333237
ENSG00000249072			4	q21.21	-1	78929666	78929842	177	1.14159	6.12357	10.4473	0.00122828	0.344443
ENSG00000074695	LMAN1	lectin, mannose-binding, 1 [Source:HGNC Symbol;Acc:6631]	18	q21.32	-1	56995055	57027194	6767	0.668379	5.66482	10.359	0.00128844	0.344443
ENSG00000138496	PARP9	poly (ADP-ribose) polymerase family, member 9 [Source:HGNC Symbol;Acc:24118]	3	q21.1	-1	122246771	122283424	8938	1.39154	4.54692	10.1728	0.00142531	0.360978
ENSG00000177189	RPS6KA3	ribosomal protein S6 kinase, 90kDa, polypeptide 3 [Source:HGNC Symbol;Acc:10432]	X	p22.12	-1	20168029	20285523	9302	-0.922709	5.54141	10.0555	0.00151897	0.365465
ENSG00000085231	TAF9	TAF9 RNA polymerase II, TATA box binding protein (TBP)-associated factor, 32kDa [Source:HGNC Symbol;Acc:11542]	5	q13.2	-1	68646811	68665840	4050	1.02051	4.34856	9.89877	0.0016539	0.367145
ENSG00000108510	MED13	mediator complex subunit 13 [Source:HGNC Symbol;Acc:22474]	17	q23.2	-1	60019966	60142643	12677	0.863333	4.4573	9.8667	0.00168297	0.367145
ENSG00000170004	CHD3	chromodomain helicase DNA binding protein 3 [Source:HGNC Symbol;Acc:1918]	17	p13.1	1	7788124	7816078	9758	0.989416	5.43798	9.78977	0.00175485	0.367145
ENSG00000114331	ACAP2	ArfGAP with coiled-coil, ankyrin repeat and PH domains 2 [Source:HGNC Symbol;Acc:16469]	3	q29	-1	194995465	195163807	11088	0.605972	7.23363	9.70206	0.00184061	0.369043
ENSG00000067248	DHX29	DEAH (Asp-Glu-Ala-His) box polypeptide 29 [Source:HGNC Symbol;Acc:15815]	5	q11.2	-1	54552073	54603550	4728	0.840509	5.41525	9.41621	0.00215076	0.413978
ENSG00000111860	CEP85L	centrosomal protein 85kDa-like [Source:HGNC Symbol;Acc:21638]	6	q22.31	-1	118781935	119031238	9462	1.1372	4.52364	9.21759	0.00239701	0.432813
ENSG00000174891	RSRC1	arginine/serine-rich coiled-coil 1 [Source:HGNC Symbol;Acc:24152]	3	q25.32	1	157823644	158263519	5117	0.851438	6.61311	9.17781	0.00244967	0.432813
ENSG00000251562	MALAT1	metastasis associated lung adenocarcinoma transcript 1 (non-protein coding) [Source:HGNC Symbol;Acc:29665]	11	q13.1	1	65265233	65273940	8708	1.3265	4.39507	9.12714	0.00251845	0.432813
ENSG00000137965	IFI44	interferon-induced protein 44 [Source:HGNC Symbol;Acc:16938]	1	p31.1	1	79115481	79129763	2801	1.23011	4.34816	9.02853	0.00265798	0.441041
ENSG00000196912	ANKRD36B	ankyrin repeat domain 36B [Source:HGNC Symbol;Acc:29333]	2	q11.2	-1	98108978	98206428	7599	1.19698	5.00422	8.86863	0.00290113	0.465342
ENSG00000173193	PARP14	poly (ADP-ribose) polymerase family, member 14 [Source:HGNC Symbol;Acc:29232]	3	q21.1	1	122399465	122449687	10495	1.13281	5.33813	8.66334	0.00324675	0.503979
ENSG00000174501	ANKRD36C	ankyrin repeat domain 36C [Source:HGNC Symbol;Acc:32946]	2	q11.1	-1	96514587	96657541	8749	0.95186	6.50101	8.45524	0.00363993	0.53895
ENSG00000079257	LXN	latexin [Source:HGNC Symbol;Acc:13347]	3	q25.32	-1	158363611	158390482	1504	1.21591	5.19411	8.41715	0.00371697	0.53895
ENSG00000035928	RFC1	replication factor C (activator 1) 1, 145kDa [Source:HGNC Symbol;Acc:9969]	4	p14	-1	39289076	39367995	6713	0.708204	5.87359	8.37316	0.00380804	0.53895
ENSG00000112081	SRSF3	serine/arginine-rich splicing factor 3 [Source:HGNC Symbol;Acc:10785]	6	p21.31	1	36562145	36573377	5283	0.753462	7.10246	8.29787	0.00396916	0.545703
ENSG00000102225	CDK16	cyclin-dependent kinase 16 [Source:HGNC Symbol;Acc:8749]	X	p11.23	1	47077259	47089396	6524	-0.751634	6.33841	8.23209	0.00411562	0.550121
ENSG00000182551	ADI1	acireductone dioxygenase 1 [Source:HGNC Symbol;Acc:30576]	2	p25.3	-1	3501132	3523507	5560	-0.77113	7.19384	7.79902	0.00522746	0.679852
ENSG00000171148	TADA3	transcriptional adaptor 3 [Source:HGNC Symbol;Acc:19422]	3	p25.3	-1	9821544	9834695	4234	-0.607693	7.20577	7.64107	0.0057054	0.708065
ENSG00000112701	SENP6	SUMO1/sentrin specific peptidase 6 [Source:HGNC Symbol;Acc:20944]	6	q14.1	1	76311225	76427997	11417	0.538227	6.50227	7.63058	0.00573868	0.708065
ENSG00000163961	RNF168	ring finger protein 168, E3 ubiquitin protein ligase [Source:HGNC Symbol;Acc:26661]	3	q29	-1	196195654	196230639	5347	0.685685	5.67157	7.47694	0.00624941	0.734164
ENSG00000255633	MTRNR2L9	MT-RNR2-like 9 (pseudogene) [Source:HGNC Symbol;Acc:37166]	6	q11.1	1	62284008	62284534	527	1.03099	4.90471	7.47523	0.00625535	0.734164
ENSG00000131013	PPIL4	peptidylprolyl isomerase (cyclophilin)-like 4 [Source:HGNC Symbol;Acc:15702]	6	q25.1	-1	149825869	149867174	2646	0.598757	5.30228	7.42502	0.00643231	0.736959
ENSG00000232196	MTRNR2L4	MT-RNR2-like 4 [Source:HGNC Symbol;Acc:37161]	16	p13.3	-1	3421053	3422283	1231	1.10968	4.40492	7.34975	0.00670719	0.737151
ENSG00000187653	TMSB4XP8	thymosin beta 4, X-linked pseudogene 8 [Source:HGNC Symbol;Acc:11885]	4	q22.1	-1	91759652	91760263	565	1.10113	7.03207	7.29931	0.00689811	0.737151
ENSG00000158604	TMED4	transmembrane emp24 protein transport domain containing 4 [Source:HGNC Symbol;Acc:22301]	7	p13	-1	44617493	44621886	3769	-0.595462	5.1656	7.23652	0.00714352	0.737151
ENSG00000229344			1	p36.33	1	568137	568818	682	0.929223	5.95409	7.20386	0.00727469	0.737151
ENSG00000137947	GTF2B	general transcription factor IIB [Source:HGNC Symbol;Acc:4648]	1	p22.2	-1	89318615	89357627	2225	1.00391	6.3333	7.07159	0.00783158	0.737151
ENSG00000175216	CKAP5	cytoskeleton associated protein 5 [Source:HGNC Symbol;Acc:28959]	11	p11.2	-1	46764598	46867847	8547	0.611732	5.80389	7.07134	0.00783265	0.737151
ENSG00000071794	HLTF	helicase-like transcription factor [Source:HGNC Symbol;Acc:11099]	3	q24	-1	148747914	148804341	6024	0.791877	5.02531	7.05996	0.00788256	0.737151
ENSG00000198160	MIER1	mesoderm induction early response 1, transcriptional regulator [Source:HGNC Symbol;Acc:29657]	1	p31.3	1	67390578	67454302	8273	0.638596	7.30387	7.04479	0.0079496	0.737151
ENSG00000122779	TRIM24	tripartite motif containing 24 [Source:HGNC Symbol;Acc:11812]	7	q33	1	138145079	138274738	9223	0.676799	5.79168	7.04067	0.00796793	0.737151
ENSG00000021574	SPAST	spastin [Source:HGNC Symbol;Acc:11233]	2	p22.3	1	32288680	32382706	5213	0.753677	4.52617	7.0259	0.0080339	0.737151
ENSG00000137815	RTF1	Rtf1, Paf1/RNA polymerase II complex component, homolog (S. cerevisiae) [Source:HGNC Symbol;Acc:28996]	15	q15.1	1	41700606	41775761	5770	0.557499	5.83867	6.98747	0.00820824	0.737151
ENSG00000237419			9	q34.3	-1	141090383	141093775	538	-1.0041	4.14713	6.95213	0.00837193	0.737151
ENSG00000096093	EFHC1	EF-hand domain (C-terminal) containing 1 [Source:HGNC Symbol;Acc:16406]	6	p12.2	1	52285106	52387892	7510	-0.894154	4.20528	6.91062	0.00856852	0.737151
ENSG00000175606	TMEM70	transmembrane protein 70 [Source:HGNC Symbol;Acc:26050]	8	q21.11	1	74884672	74895018	2982	1.33342	7.62304	6.85582	0.00883531	0.737151
ENSG00000152404	CWF19L2	CWF19-like 2, cell cycle control (S. pombe) [Source:HGNC Symbol;Acc:26508]	11	q22.3	-1	107197071	107328572	3583	0.952498	5.08573	6.84259	0.00890095	0.737151
ENSG00000183751	TBL3	transducin (beta)-like 3 [Source:HGNC Symbol;Acc:11587]	16	p13.3	1	2022038	2032934	7139	1.17438	3.98325	6.82248	0.00900175	0.737151
ENSG00000116337	AMPD2	adenosine monophosphate deaminase 2 [Source:HGNC Symbol;Acc:469]	1	p13.3	1	110158726	110174673	6828	-0.587177	5.9812	6.75164	0.00936615	0.737151
ENSG00000071205	ARHGAP10	Rho GTPase activating protein 10 [Source:HGNC Symbol;Acc:26099]	4	q31.23	1	148653214	148993931	10759	0.746123	6.72652	6.74149	0.00941959	0.737151
ENSG00000153914	SREK1	splicing regulatory glutamine/lysine-rich protein 1 [Source:HGNC Symbol;Acc:17882]	5	q12.3	1	65435799	65479443	18240	0.597763	6.06104	6.7261	0.00950122	0.737151
ENSG00000148690	FRA10AC1	fragile site, folic acid type, rare, fra(10)(q23.3) or fra(10)(q24.2) candidate 1 [Source:HGNC Symbol;Acc:1162]	10	q23.33	-1	95427640	95462329	8222	0.678743	6.8011	6.70398	0.00961981	0.737151
ENSG00000125733	TRIP10	thyroid hormone receptor interactor 10 [Source:HGNC Symbol;Acc:12304]	19	p13.3	1	6737936	6751537	3982	0.775256	4.77608	6.68379	0.00972935	0.737151
ENSG00000137073	UBAP2	ubiquitin associated protein 2 [Source:HGNC Symbol;Acc:14185]	9	p13.3	-1	33921691	34048947	10610	0.746408	7.2001	6.66929	0.00980881	0.737151
ENSG00000196230	TUBB	tubulin, beta class I [Source:HGNC Symbol;Acc:20778]	6	p21.33	1	30687978	30693203	3359	-0.542186	5.62567	6.61288	0.0101244	0.737151
ENSG00000055208	TAB2	TGF-beta activated kinase 1/MAP3K7 binding protein 2 [Source:HGNC Symbol;Acc:17075]	6	q25.1	1	149539777	149732749	5758	0.680815	5.2177	6.59963	0.0102	0.737151
ENSG00000174720	LARP7	La ribonucleoprotein domain family, member 7 [Source:HGNC Symbol;Acc:24912]	4	q25	1	113558120	113578748	4083	0.587168	5.01027	6.58854	0.0102637	0.737151
ENSG00000237542			2	q33.2	1	203481423	203481935	513	1.17242	4.12927	6.53812	0.0105587	0.747181
ENSG00000128789	PSMG2	proteasome (prosome, macropain) assembly chaperone 2 [Source:HGNC Symbol;Acc:24929]	18	p11.21	1	12658737	12725739	2734	0.6069	5.07134	6.4933	0.0108282	0.748786
ENSG00000078596	ITM2A	integral membrane protein 2A [Source:HGNC Symbol;Acc:6173]	X	q21.1	-1	78615881	78623164	2051	-0.617728	7.19624	6.48207	0.0108968	0.748786
ENSG00000123737	EXOSC9	exosome component 9 [Source:HGNC Symbol;Acc:9137]	4	q27	1	122722472	122738176	4711	1.19775	3.77983	6.44383	0.0111339	0.748786
ENSG00000068878	PSME4	proteasome (prosome, macropain) activator subunit 4 [Source:HGNC Symbol;Acc:20635]	2	p16.2	-1	54091204	54197977	10259	0.783001	5.8203	6.42665	0.0112421	0.748786
ENSG00000181555	SETD2	SET domain containing 2 [Source:HGNC Symbol;Acc:18420]	3	p21.31	-1	47057919	47205457	10019	0.638094	5.40765	6.40821	0.0113594	0.748786
ENSG00000163913	IFT122	intraflagellar transport 122 homolog (Chlamydomonas) [Source:HGNC Symbol;Acc:13556]	3	q21.3	1	129158968	129239198	9395	-1.12454	4.41608	6.33337	0.0118487	0.770488
ENSG00000124383	MPHOSPH10	M-phase phosphoprotein 10 (U3 small nucleolar ribonucleoprotein) [Source:HGNC Symbol;Acc:7213]	2	p13.3	1	71357444	71377231	4673	0.96442	4.35437	6.24226	0.0124738	0.786608
ENSG00000196405	EVL	Enah/Vasp-like [Source:HGNC Symbol;Acc:20234]	14	q32.2	1	100437786	100610573	10585	0.611482	6.10922	6.21425	0.0126726	0.786608
ENSG00000116815	CD58	CD58 molecule [Source:HGNC Symbol;Acc:1688]	1	p13.1	-1	117057157	117113661	1783	1.16803	4.839	6.19478	0.0128128	0.786608
ENSG00000204120	GIGYF2	GRB10 interacting GYF protein 2 [Source:HGNC Symbol;Acc:11960]	2	q37.1	1	233562009	233725285	13434	0.78902	4.57317	6.18781	0.0128633	0.786608
ENSG00000066654	THUMPD1	THUMP domain containing 1 [Source:HGNC Symbol;Acc:23807]	16	p12.3	-1	20744986	20753406	5092	0.770993	4.87149	6.18086	0.012914	0.786608
ENSG00000198502	HLA-DRB5	major histocompatibility complex, class II, DR beta 5 [Source:HGNC Symbol;Acc:4953]	6	p21.32	-1	32485120	32498064	1260	1.8195	4.45753	6.10853	0.0134531	0.809203
ENSG00000216937	CCDC7	coiled-coil domain containing 7 [Source:HGNC Symbol;Acc:26533]	10	p11.22	1	32735068	32863492	5690	0.836559	4.87108	6.06378	0.0137982	0.819714
ENSG00000180190	TDRP	testis development related protein [Source:HGNC Symbol;Acc:26951]	8	p23.3	-1	439803	495781	3602	-0.642168	5.20601	6.02051	0.0141406	0.823275
ENSG00000140471	LINS	lines homolog (Drosophila) [Source:HGNC Symbol;Acc:30922]	15	q26.3	-1	101099574	101143435	7790	0.898656	5.2717	5.99943	0.0143105	0.823275
ENSG00000196565	HBG2	hemoglobin, gamma G [Source:HGNC Symbol;Acc:4832]	11	p15.4	-1	5274420	5667019	2027	-1.77931	5.11465	5.99038	0.0143841	0.823275
ENSG00000158417	EIF5B	eukaryotic translation initiation factor 5B [Source:HGNC Symbol;Acc:30793]	2	q11.2	1	99953816	100017789	7877	0.697316	5.65031	5.95357	0.0146875	0.823275
ENSG00000158411	MITD1	MIT, microtubule interacting and transport, domain containing 1 [Source:HGNC Symbol;Acc:25207]	2	q11.2	-1	99777890	99797521	4305	0.783008	4.45897	5.92787	0.0149032	0.823275
ENSG00000088832	FKBP1A	FK506 binding protein 1A, 12kDa [Source:HGNC Symbol;Acc:3711]	20	p13	-1	1349622	1373806	2369	-0.660748	6.51604	5.90791	0.015073	0.823275
ENSG00000167257	RNF214	ring finger protein 214 [Source:HGNC Symbol;Acc:25335]	11	q23.3	1	117103341	117157161	4398	0.653384	4.40325	5.88993	0.0152277	0.823275
ENSG00000178105	DDX10	DEAD (Asp-Glu-Ala-Asp) box polypeptide 10 [Source:HGNC Symbol;Acc:2735]	11	q22.3	1	108535752	108811657	8461	0.730474	4.16182	5.87796	0.0153316	0.823275
ENSG00000163743	RCHY1	ring finger and CHY zinc finger domain containing 1, E3 ubiquitin protein ligase [Source:HGNC Symbol;Acc:17479]	4	q21.1	-1	76404247	76439974	6565	0.733595	7.2663	5.87036	0.0153979	0.823275
ENSG00000138767	CNOT6L	CCR4-NOT transcription complex, subunit 6-like [Source:HGNC Symbol;Acc:18042]	4	q21.1	-1	78634541	78740769	9367	0.632471	4.6159	5.85033	0.0155741	0.823544
ENSG00000116044	NFE2L2	nuclear factor, erythroid 2-like 2 [Source:HGNC Symbol;Acc:7782]	2	q31.2	-1	178092323	178257425	5907	0.645568	5.88091	5.7927	0.0160928	0.841725
ENSG00000136169	SETDB2	SET domain, bifurcated 2 [Source:HGNC Symbol;Acc:20263]	13	q14.2	1	50018429	50069138	6741	0.953967	3.92272	5.75559	0.0164362	0.842687
ENSG00000119778	ATAD2B	ATPase family, AAA domain containing 2B [Source:HGNC Symbol;Acc:29230]	2	p23.3	-1	23971534	24149984	10492	0.685238	5.92496	5.7529	0.0164615	0.842687
ENSG00000198924	DCLRE1A	DNA cross-link repair 1A [Source:HGNC Symbol;Acc:17660]	10	q25.3	-1	115594488	115614142	4596	0.91625	6.32407	5.71525	0.0168181	0.845213
ENSG00000054267	ARID4B	AT rich interactive domain 4B (RBP1-like) [Source:HGNC Symbol;Acc:15550]	1	q42.3	-1	235294949	235491534	11073	0.526266	7.30684	5.71067	0.0168621	0.845213
ENSG00000145860	RNF145	ring finger protein 145 [Source:HGNC Symbol;Acc:20853]	5	q33.3	-1	158584417	158637061	4567	0.619223	4.3952	5.64725	0.0174828	0.854363
ENSG00000124177	CHD6	chromodomain helicase DNA binding protein 6 [Source:HGNC Symbol;Acc:19057]	20	q12	-1	40030741	40247133	14119	0.618998	4.25574	5.62619	0.017694	0.854363
ENSG00000082898	XPO1	exportin 1 (CRM1 homolog, yeast) [Source:HGNC Symbol;Acc:12825]	2	p15	-1	61704984	61765761	11708	0.508555	6.1794	5.61965	0.0177602	0.854363
ENSG00000126777	KTN1	kinectin 1 (kinesin receptor) [Source:HGNC Symbol;Acc:6467]	14	q22.3	1	56025790	56168244	17578	0.524903	7.18641	5.60764	0.0178823	0.854363
ENSG00000058866	DGKG	diacylglycerol kinase, gamma 90kDa [Source:HGNC Symbol;Acc:2853]	3	q27.3	-1	185823457	186080026	10978	-0.607387	5.84841	5.60274	0.0179324	0.854363
ENSG00000123908	AGO2	argonaute RISC catalytic component 2 [Source:HGNC Symbol;Acc:3263]	8	q24.3	-1	141541264	141645718	4824	-0.770815	4.56425	5.57504	0.0182183	0.854507
ENSG00000048649	RSF1	remodeling and spacing factor 1 [Source:HGNC Symbol;Acc:18118]	11	q14.1	-1	77371041	77532063	15740	0.596999	7.83959	5.5681	0.0182906	0.854507
ENSG00000115368	WDR75	WD repeat domain 75 [Source:HGNC Symbol;Acc:25725]	2	q32.2	1	190306159	190340291	5066	1.04301	4.15023	5.54372	0.0185471	0.858161
ENSG00000044459	CNTLN	centlein, centrosomal protein [Source:HGNC Symbol;Acc:23432]	9	p22.2	1	17134980	17503921	11167	0.684349	7.03868	5.5073	0.0189372	0.858961
ENSG00000147874	HAUS6	HAUS augmin-like complex, subunit 6 [Source:HGNC Symbol;Acc:25948]	9	p22.1	-1	19053141	19103117	7932	0.777833	4.94138	5.50541	0.0189578	0.858961
ENSG00000104412	EMC2	ER membrane protein complex subunit 2 [Source:HGNC Symbol;Acc:28963]	8	q23.1	1	109455830	109499145	3779	0.676822	6.3549	5.47748	0.019263	0.858961
ENSG00000151466	SCLT1	sodium channel and clathrin linker 1 [Source:HGNC Symbol;Acc:26406]	4	q28.2	-1	129786076	130014764	8294	0.63782	9.18568	5.46598	0.0193902	0.858961
ENSG00000237805			17	q12	1	34195971	34212867	662	-0.962753	4.65568	5.45997	0.0194569	0.858961
ENSG00000123106	CCDC91	coiled-coil domain containing 91 [Source:HGNC Symbol;Acc:24855]	12	p11.22	1	28286182	28732883	5461	0.518407	7.46155	5.43689	0.0197157	0.862472
ENSG00000141141	DDX52	DEAD (Asp-Glu-Ala-Asp) box polypeptide 52 [Source:HGNC Symbol;Acc:20038]	17	q12	-1	35969787	36003493	9543	1.02632	4.30123	5.40954	0.020027	0.868196
ENSG00000181381	DDX60L	DEAD (Asp-Glu-Ala-Asp) box polypeptide 60-like [Source:HGNC Symbol;Acc:26429]	4	q32.3	-1	169277886	169458937	12156	1.00893	4.69701	5.39163	0.0202336	0.869322
ENSG00000070214	SLC44A1	solute carrier family 44 (choline transporter), member 1 [Source:HGNC Symbol;Acc:18798]	9	q31.1	1	108006903	108201452	12613	-0.514359	8.0299	5.3445	0.0207877	0.885225
ENSG00000137776	SLTM	SAFB-like, transcription modulator [Source:HGNC Symbol;Acc:20709]	15	q22.1	-1	59171244	59225852	8157	0.566246	9.66615	5.28869	0.0214643	0.905765
ENSG00000137628	DDX60	DEAD (Asp-Glu-Ala-Asp) box polypeptide 60 [Source:HGNC Symbol;Acc:25942]	4	q32.3	-1	169137444	169239958	6750	1.04018	5.00656	5.27219	0.0216688	0.905765
ENSG00000065243	PKN2	protein kinase N2 [Source:HGNC Symbol;Acc:9406]	1	p22.2	1	89149905	89301938	7014	0.692824	5.04778	5.22636	0.022247	0.905765
ENSG00000234545	FAM133B	family with sequence similarity 133, member B [Source:HGNC Symbol;Acc:28629]	7	q21.2	-1	92190107	92219708	4462	0.657871	6.28931	5.20956	0.022463	0.905765
ENSG00000155008	APOOL	apolipoprotein O-like [Source:HGNC Symbol;Acc:24009]	X	q21.1	1	84258832	84343069	1279	0.832186	4.30935	5.20474	0.0225253	0.905765
ENSG00000109062	SLC9A3R1	solute carrier family 9, subfamily A (NHE3, cation proton antiporter 3), member 3 regulator 1 [Source:HGNC Symbol;Acc:11075]	17	q25.1	1	72744791	72765492	2315	-0.34975	7.31158	5.1998	0.0225895	0.905765
ENSG00000120688	WBP4	WW domain binding protein 4 [Source:HGNC Symbol;Acc:12739]	13	q14.11	1	41635410	41658137	2618	0.617507	5.20265	5.19733	0.0226216	0.905765
ENSG00000149308	NPAT	nuclear protein, ataxia-telangiectasia locus [Source:HGNC Symbol;Acc:7896]	11	q22.3	-1	108027942	108093369	7534	0.523719	5.53026	5.18552	0.0227759	0.905765
ENSG00000092621	PHGDH	phosphoglycerate dehydrogenase [Source:HGNC Symbol;Acc:8923]	1	p12	1	120202421	120286838	5622	-0.991806	4.63112	5.14952	0.0232528	0.912275
ENSG00000119397	CNTRL	centriolin [Source:HGNC Symbol;Acc:1858]	9	q33.2	1	123837141	123939888	9417	0.701592	6.06029	5.12797	0.0235432	0.912275
ENSG00000082805	ERC1	ELKS/RAB6-interacting/CAST family member 1 [Source:HGNC Symbol;Acc:17072]	12	p13.33	1	1099675	1605099	13484	0.803621	3.93335	5.11457	0.0237257	0.912275
ENSG00000117475	BLZF1	basic leucine zipper nuclear factor 1 [Source:HGNC Symbol;Acc:1065]	1	q24.2	1	169337208	169365778	3820	0.766053	5.65859	5.10388	0.0238724	0.912275
ENSG00000124422	USP22	ubiquitin specific peptidase 22 [Source:HGNC Symbol;Acc:12621]	17	p11.2	-1	20902910	20947073	6804	-0.667726	4.68349	5.10278	0.0238875	0.912275
ENSG00000145495	2006-03-01	membrane-associated ring finger (C3HC4) 6, E3 ubiquitin protein ligase [Source:HGNC Symbol;Acc:30550]	5	p15.2	1	10353815	10440500	11336	-0.476057	7.50939	5.06837	0.0243663	0.912701
ENSG00000164104	HMGB2	high mobility group box 2 [Source:HGNC Symbol;Acc:5000]	4	q34.1	-1	174252846	174256276	2775	0.55063	6.14215	5.0554	0.0245493	0.912701
ENSG00000081870	HSPB11	heat shock protein family B (small), member 11 [Source:HGNC Symbol;Acc:25019]	1	p32.3	-1	54382247	54411602	3236	0.56754	5.43139	5.04651	0.0246756	0.912701
ENSG00000096872	IFT74	intraflagellar transport 74 homolog (Chlamydomonas) [Source:HGNC Symbol;Acc:21424]	9	p21.2	1	26947037	27062928	3755	0.638666	5.42168	5.04023	0.0247652	0.912701
ENSG00000106462	EZH2	enhancer of zeste homolog 2 (Drosophila) [Source:HGNC Symbol;Acc:3527]	7	q36.1	-1	148504475	148581413	4522	0.813589	4.50554	5.01942	0.0250646	0.912701
ENSG00000134108	ARL8B	ADP-ribosylation factor-like 8B [Source:HGNC Symbol;Acc:25564]	3	p26.1	1	5163905	5222596	3575	0.598217	8.25281	4.9764	0.0256955	0.912701
ENSG00000102977	ACD	adrenocortical dysplasia homolog (mouse) [Source:HGNC Symbol;Acc:25070]	16	q22.1	-1	67691415	67694713	3218	-0.512206	5.57651	4.97413	0.0257292	0.912701
ENSG00000113643	RARS	arginyl-tRNA synthetase [Source:HGNC Symbol;Acc:9870]	5	q34	1	167913450	167946304	3421	0.711672	5.10167	4.96714	0.0258334	0.912701
ENSG00000106665	CLIP2	CAP-GLY domain containing linker protein 2 [Source:HGNC Symbol;Acc:2586]	7	q11.23	1	73703805	73820273	7315	-0.835382	5.40751	4.93936	0.0262517	0.912701
ENSG00000053371	AKR7A2	aldo-keto reductase family 7, member A2 (aflatoxin aldehyde reductase) [Source:HGNC Symbol;Acc:389]	1	p36.13	-1	19630459	19638640	1781	-0.550797	6.24985	4.93761	0.0262784	0.912701
ENSG00000168259	DNAJC7	DnaJ (Hsp40) homolog, subfamily C, member 7 [Source:HGNC Symbol;Acc:12392]	17	q21.2	-1	40128451	40173394	9373	0.499676	5.73192	4.93337	0.0263429	0.912701
ENSG00000237973		hsa-mir-6723 [Source:miRBase;Acc:MI0022558]	1	p36.33	1	566454	567996	1543	0.813675	4.87384	4.91563	0.0266148	0.912701
ENSG00000239445	ST3GAL6-AS1	ST3GAL6 antisense RNA 1 [Source:HGNC Symbol;Acc:40828]	3	q12.1	-1	98433174	98451495	843	-0.781847	4.3731	4.90721	0.0267449	0.912701
ENSG00000115415	STAT1	signal transducer and activator of transcription 1, 91kDa [Source:HGNC Symbol;Acc:11362]	2	q32.2	-1	191829084	191885686	6053	0.796069	7.24708	4.89504	0.0269339	0.912701
ENSG00000118058	KMT2A	lysine (K)-specific methyltransferase 2A [Source:HGNC Symbol;Acc:7132]	11	q23.3	1	118307205	118397539	21953	0.607382	4.93633	4.89114	0.0269949	0.912701
ENSG00000123091	RNF11	ring finger protein 11 [Source:HGNC Symbol;Acc:10056]	1	p32.3	1	51701943	51739127	3122	-0.556503	8.75587	4.8771	0.0272152	0.912701
ENSG00000075292	ZNF638	zinc finger protein 638 [Source:HGNC Symbol;Acc:17894]	2	p13.2	1	71503691	71662199	14127	0.562525	6.0341	4.87022	0.027324	0.912701
ENSG00000127870	RNF6	ring finger protein (C3H2C3 type) 6 [Source:HGNC Symbol;Acc:10069]	13	q12.13	-1	26706253	26796791	4776	-0.582328	4.41431	4.85446	0.0275747	0.912701
ENSG00000165458	INPPL1	inositol polyphosphate phosphatase-like 1 [Source:HGNC Symbol;Acc:6080]	11	q13.4	1	71934745	71950149	6519	-0.656379	5.11295	4.82914	0.0279826	0.912701
ENSG00000130734	ATG4D	autophagy related 4D, cysteine peptidase [Source:HGNC Symbol;Acc:20789]	19	p13.2	1	10654571	10664094	2278	0.676807	4.11317	4.82097	0.0281155	0.912701
ENSG00000162929	KIAA1841	KIAA1841 [Source:HGNC Symbol;Acc:29387]	2	p16.1	1	61293006	61391960	9632	0.72603	6.34902	4.81786	0.0281663	0.912701
ENSG00000077713	SLC25A43	solute carrier family 25, member 43 [Source:HGNC Symbol;Acc:30557]	X	q24	1	118533023	118588441	3115	-0.877491	4.07772	4.81288	0.0282478	0.912701
ENSG00000258890	CEP95	centrosomal protein 95kDa [Source:HGNC Symbol;Acc:25141]	17	q23.3	1	62502706	62538579	8048	0.870762	4.2854	4.8096	0.0283017	0.912701
ENSG00000150403	TMCO3	transmembrane and coiled-coil domains 3 [Source:HGNC Symbol;Acc:20329]	13	q34	1	114145310	114204542	3682	-0.78714	4.86759	4.80054	0.0284508	0.912701
ENSG00000077984	CST7	cystatin F (leukocystatin) [Source:HGNC Symbol;Acc:2479]	20	p11.21	1	24929866	24940564	930	-0.885926	6.2038	4.77968	0.0287974	0.917703
ENSG00000204130	RUFY2	RUN and FYVE domain containing 2 [Source:HGNC Symbol;Acc:19761]	10	q21.3	-1	70100864	70167051	8137	0.746968	5.00012	4.72733	0.0296869	0.928756
ENSG00000060138	YBX3	Y box binding protein 3 [Source:HGNC Symbol;Acc:2428]	12	p13.2	-1	10851683	10875911	8615	-0.385347	8.7464	4.71043	0.0299801	0.928756
ENSG00000123200	ZC3H13	zinc finger CCCH-type containing 13 [Source:HGNC Symbol;Acc:20368]	13	q14.13	-1	46528600	46626894	10262	0.49623	6.79396	4.68509	0.0304255	0.928756
ENSG00000078747	ITCH	itchy E3 ubiquitin protein ligase [Source:HGNC Symbol;Acc:13890]	20	q11.22	1	32951041	33099198	6664	-0.744672	4.71041	4.68135	0.0304917	0.928756
ENSG00000138642	HERC6	HECT and RLD domain containing E3 ubiquitin protein ligase family member 6 [Source:HGNC Symbol;Acc:26072]	4	q22.1	1	89299891	89364263	5793	0.921477	5.56818	4.67676	0.0305733	0.928756
ENSG00000028203	VEZT	vezatin, adherens junctions transmembrane protein [Source:HGNC Symbol;Acc:18258]	12	q22	1	95611522	95696566	8757	0.619519	4.96333	4.64698	0.0311083	0.928756
ENSG00000166004	KIAA1731	KIAA1731 [Source:HGNC Symbol;Acc:29366]	11	q21	1	93394805	93463522	9493	0.588499	5.04094	4.63255	0.031371	0.928756
ENSG00000086506	HBQ1	hemoglobin, theta 1 [Source:HGNC Symbol;Acc:4833]	16	p13.3	1	230452	231180	536	-0.688149	5.38226	4.61871	0.031625	0.928756
ENSG00000118482	PHF3	PHD finger protein 3 [Source:HGNC Symbol;Acc:8921]	6	q12	1	64345725	64489229	10378	0.764587	4.6491	4.61053	0.0317762	0.928756
ENSG00000168610	STAT3	signal transducer and activator of transcription 3 (acute-phase response factor) [Source:HGNC Symbol;Acc:11364]	17	q21.2	-1	40465342	40540586	8812	-0.407878	8.05311	4.60871	0.0318099	0.928756
ENSG00000101367	MAPRE1	microtubule-associated protein, RP/EB family, member 1 [Source:HGNC Symbol;Acc:6890]	20	q11.21	1	31407699	31438211	2623	-0.437337	6.81071	4.60574	0.031865	0.928756
ENSG00000142657	PGD	phosphogluconate dehydrogenase [Source:HGNC Symbol;Acc:8891]	1	p36.22	1	10458649	10480201	3171	-0.385361	8.69674	4.6002	0.0319682	0.928756
ENSG00000164252	AGGF1	angiogenic factor with G patch and FHA domains 1 [Source:HGNC Symbol;Acc:24684]	5	q13.3	1	76325076	76361059	5051	0.620797	4.46555	4.58626	0.0322293	0.928756
ENSG00000140367	UBE2Q2	ubiquitin-conjugating enzyme E2Q family member 2 [Source:HGNC Symbol;Acc:19248]	15	q24.2	1	76135622	76193419	3856	0.540061	8.3643	4.5709	0.0325195	0.928756
ENSG00000112079	STK38	serine/threonine kinase 38 [Source:HGNC Symbol;Acc:17847]	6	p21.31	-1	36461669	36515247	3576	-0.450285	6.51565	4.56731	0.0325876	0.928756
ENSG00000168685	IL7R	interleukin 7 receptor [Source:HGNC Symbol;Acc:6024]	5	p13.2	1	35852797	35879705	6060	0.83781	5.12855	4.56472	0.0326369	0.928756
ENSG00000175215	CTDSP2	CTD (carboxy-terminal domain, RNA polymerase II, polypeptide A) small phosphatase 2 [Source:HGNC Symbol;Acc:17077]	12	q14.1	-1	58213710	58240522	5442	-0.459331	5.21311	4.5545	0.0328323	0.928756
ENSG00000010404	IDS	iduronate 2-sulfatase [Source:HGNC Symbol;Acc:5389]	X	q28	-1	148558521	148615470	10496	-0.509886	5.73574	4.54987	0.0329212	0.928756
ENSG00000107521	HPS1	Hermansky-Pudlak syndrome 1 [Source:HGNC Symbol;Acc:5163]	10	q24.2	-1	100175955	100206684	5277	-0.438311	6.84237	4.54977	0.0329232	0.928756
ENSG00000203875	SNHG5	small nucleolar RNA host gene 5 (non-protein coding) [Source:HGNC Symbol;Acc:21026]	6	q14.3	-1	86370710	86388451	2206	0.733704	6.87116	4.54555	0.0330044	0.928756
ENSG00000138433	CIR1	corepressor interacting with RBPJ, 1 [Source:HGNC Symbol;Acc:24217]	2	q31.1	-1	175212750	175260443	3209	0.515058	6.03392	4.49202	0.0340533	0.943258
ENSG00000089048	ESF1	ESF1, nucleolar pre-rRNA processing protein, homolog (S. cerevisiae) [Source:HGNC Symbol;Acc:15898]	20	p12.1	-1	13694969	13765532	3216	0.744163	4.13242	4.48512	0.0341912	0.943258
ENSG00000233968			10	p12.31	-1	19999257	20017479	2151	-0.629248	7.85862	4.48399	0.0342138	0.943258
ENSG00000139970	RTN1	reticulon 1 [Source:HGNC Symbol;Acc:10467]	14	q23.1	-1	60062694	60337684	6209	-0.499029	6.14919	4.46854	0.0345246	0.943258
ENSG00000167110	GOLGA2	golgin A2 [Source:HGNC Symbol;Acc:4425]	9	q34.11	-1	131018108	131038274	6961	0.514855	5.68291	4.46715	0.0345525	0.943258
ENSG00000143669	LYST	lysosomal trafficking regulator [Source:HGNC Symbol;Acc:1968]	1	q42.3	-1	235824341	236046940	19616	0.545407	6.52512	4.4482	0.034938	0.943258
ENSG00000172775	FAM192A	family with sequence similarity 192, member A [Source:HGNC Symbol;Acc:29856]	16	q13	-1	57186378	57220028	4347	0.388005	6.29447	4.44108	0.035084	0.943258
ENSG00000144224	UBXN4	UBX domain protein 4 [Source:HGNC Symbol;Acc:14860]	2	q21.3	1	136499189	136542625	5112	0.396725	7.64212	4.43258	0.0352592	0.943258
ENSG00000101290	CDS2	CDP-diacylglycerol synthase (phosphatidate cytidylyltransferase) 2 [Source:HGNC Symbol;Acc:1801]	20	p12.3	1	5107432	5178533	11893	-0.502165	6.69459	4.43138	0.035284	0.943258
ENSG00000159753	RLTPR	RGD motif, leucine rich repeats, tropomodulin domain and proline-rich containing [Source:HGNC Symbol;Acc:27089]	16	q22.1	1	67678822	67691472	7699	1.0668	4.41954	4.38977	0.0361551	0.958419
ENSG00000111669	TPI1	triosephosphate isomerase 1 [Source:HGNC Symbol;Acc:12009]	12	p13.31	1	6976283	6980112	2700	-0.360942	8.9986	4.3689	0.0366007	0.958419
ENSG00000068354	TBC1D25	TBC1 domain family, member 25 [Source:HGNC Symbol;Acc:8092]	X	p11.23	1	48397845	48420997	4223	-0.59563	4.3933	4.35892	0.0368156	0.958419
ENSG00000090686	USP48	ubiquitin specific peptidase 48 [Source:HGNC Symbol;Acc:18533]	1	p36.12	-1	22004791	22110099	9497	0.463558	6.63783	4.35827	0.0368296	0.958419
ENSG00000102524	TNFSF13B	tumor necrosis factor (ligand) superfamily, member 13b [Source:HGNC Symbol;Acc:11929]	13	q33.3	1	108903588	108960832	3059	0.461972	7.06776	4.35348	0.0369333	0.958419
ENSG00000116754	SRSF11	serine/arginine-rich splicing factor 11 [Source:HGNC Symbol;Acc:10782]	1	p31.1	1	70671365	70718735	8477	0.542101	7.14187	4.33871	0.0372552	0.958419
ENSG00000196535	MYO18A	myosin XVIIIA [Source:HGNC Symbol;Acc:31104]	17	q11.2	-1	27400528	27507430	10771	-0.83948	4.09994	4.32024	0.0376617	0.958419
ENSG00000110218	PANX1	pannexin 1 [Source:HGNC Symbol;Acc:8599]	11	q21	1	93862094	93915138	2769	-0.513093	6.03883	4.31083	0.0378705	0.958419
ENSG00000198668	CALM1	calmodulin 1 (phosphorylase kinase, delta) [Source:HGNC Symbol;Acc:1442]	14	q32.11	1	90862846	90874605	7705	-0.451819	11.3345	4.31076	0.0378721	0.958419
ENSG00000046651	OFD1	oral-facial-digital syndrome 1 [Source:HGNC Symbol;Acc:2567]	X	p22.2	1	13752832	13787480	5212	0.414159	7.30711	4.30514	0.0379974	0.958419
ENSG00000129354	AP1M2	adaptor-related protein complex 1, mu 2 subunit [Source:HGNC Symbol;Acc:558]	19	p13.2	-1	10683347	10697991	2214	-0.50981	6.69621	4.2952	0.03822	0.958419
ENSG00000157601	MX1	myxovirus (influenza virus) resistance 1, interferon-inducible protein p78 (mouse) [Source:HGNC Symbol;Acc:7532]	21	q22.3	1	42792231	42831141	8611	0.823257	5.06844	4.28461	0.0384589	0.958419
ENSG00000115904	SOS1	son of sevenless homolog 1 (Drosophila) [Source:HGNC Symbol;Acc:11187]	2	p22.1	-1	39208537	39351486	9350	0.568199	5.05949	4.27894	0.0385874	0.958419
ENSG00000115762	PLEKHB2	pleckstrin homology domain containing, family B (evectins) member 2 [Source:HGNC Symbol;Acc:19236]	2	q21.1	1	131862420	132111282	6685	-0.499392	5.78858	4.27074	0.0387741	0.958419
ENSG00000173598	NUDT4	nudix (nucleoside diphosphate linked moiety X)-type motif 4 [Source:HGNC Symbol;Acc:8051]	12	q22	1	93771659	93797024	5180	0.549511	4.45276	4.26791	0.0388387	0.958419
ENSG00000101082	SLA2	Src-like-adaptor 2 [Source:HGNC Symbol;Acc:17329]	20	q11.23	-1	35240721	35274619	2757	-0.524579	6.5403	4.23329	0.0396385	0.972894
ENSG00000100592	DAAM1	dishevelled associated activator of morphogenesis 1 [Source:HGNC Symbol;Acc:18142]	14	q23.1	1	59655364	59838123	10712	0.490446	7.68275	4.22513	0.0398296	0.972894
ENSG00000163565	IFI16	interferon, gamma-inducible protein 16 [Source:HGNC Symbol;Acc:5395]	1	q23.1	1	158969758	159024945	5294	0.609518	5.75287	4.19931	0.0404403	0.975349
ENSG00000153561	RMND5A	required for meiotic nuclear division 5 homolog A (S. cerevisiae) [Source:HGNC Symbol;Acc:25850]	2	p11.2	1	86947296	87005164	6804	-0.541817	5.68336	4.19343	0.0405808	0.975349
ENSG00000130176	CNN1	calponin 1, basic, smooth muscle [Source:HGNC Symbol;Acc:2155]	19	p13.2	1	11649532	11661138	2939	-0.813177	5.15011	4.18575	0.0407653	0.975349
ENSG00000033170	FUT8	fucosyltransferase 8 (alpha (1,6) fucosyltransferase) [Source:HGNC Symbol;Acc:4019]	14	q23.3	1	65877310	66210839	6889	0.634405	5.12791	4.18105	0.0408783	0.975349
ENSG00000185088	RPS27L	ribosomal protein S27-like [Source:HGNC Symbol;Acc:18476]	15	q22.2	-1	63418071	63450220	4037	0.549585	6.25666	4.17835	0.0409436	0.975349
ENSG00000142208	AKT1	v-akt murine thymoma viral oncogene homolog 1 [Source:HGNC Symbol;Acc:391]	14	q32.33	-1	105235686	105262088	10838	-0.471845	6.19103	4.16316	0.0413122	0.975692
ENSG00000106443	PHF14	PHD finger protein 14 [Source:HGNC Symbol;Acc:22203]	7	p21.3	1	11013499	11209250	8727	0.439296	5.66104	4.15517	0.0415077	0.975692
ENSG00000198015	MRPL42	mitochondrial ribosomal protein L42 [Source:HGNC Symbol;Acc:14493]	12	q22	1	93861264	93897545	3949	-0.783326	3.8271	4.14655	0.0417196	0.975692
ENSG00000157954	WIPI2	WD repeat domain, phosphoinositide interacting 2 [Source:HGNC Symbol;Acc:32225]	7	p22.1	1	5229819	5273457	8977	-0.429952	5.78892	4.14454	0.041769	0.975692
ENSG00000188313	PLSCR1	phospholipid scramblase 1 [Source:HGNC Symbol;Acc:9092]	3	q24	-1	146232967	146262651	4340	0.795764	5.23543	4.08504	0.0432645	0.99989
ENSG00000105856	HBP1	HMG-box transcription factor 1 [Source:HGNC Symbol;Acc:23200]	7	q22.3	1	106809406	106842974	6351	-0.50006	6.57556	4.0785	0.0434321	0.99989
ENSG00000244754	N4BP2L2	NEDD4 binding protein 2-like 2 [Source:HGNC Symbol;Acc:26916]	13	q13.1	-1	33006554	33112970	10306	0.5015	6.20869	4.06068	0.0438927	0.99989
ENSG00000112992	NNT	nicotinamide nucleotide transhydrogenase [Source:HGNC Symbol;Acc:7863]	5	p12	1	43602794	43707507	8245	-0.466626	7.14231	4.05771	0.0439701	0.99989
ENSG00000110090	CPT1A	carnitine palmitoyltransferase 1A (liver) [Source:HGNC Symbol;Acc:2328]	11	q13.3	-1	68522088	68611878	6565	-0.612192	4.98719	4.05388	0.04407	0.99989
ENSG00000131051	RBM39	RNA binding motif protein 39 [Source:HGNC Symbol;Acc:15923]	20	q11.22	-1	34291531	34330234	9307	0.308245	8.58914	4.05059	0.044156	0.99989
ENSG00000074054	CLASP1	cytoplasmic linker associated protein 1 [Source:HGNC Symbol;Acc:17088]	2	q14.3	-1	122095352	122407163	11099	-0.672791	5.12203	4.04308	0.0443528	0.99989
ENSG00000211898	IGHD	immunoglobulin heavy constant delta [Source:HGNC Symbol;Acc:5480]	14	q32.33	-1	106303099	106312010	1678	1.1192	5.20867	4.03069	0.0446796	0.99989
ENSG00000188529	SRSF10	serine/arginine-rich splicing factor 10 [Source:HGNC Symbol;Acc:16713]	1	p36.11	-1	24291294	24307417	10277	0.413027	5.4415	4.01082	0.0452092	0.99989
ENSG00000147649	MTDH	metadherin [Source:HGNC Symbol;Acc:29608]	8	q22.1	1	98656407	98740998	6391	0.334298	7.20543	3.98281	0.0459669	0.99989
ENSG00000171634	BPTF	bromodomain PHD finger transcription factor [Source:HGNC Symbol;Acc:3581]	17	q24.2	1	65821640	65980494	15098	0.432849	6.69011	3.96703	0.0463996	0.99989
ENSG00000198162	MAN1A2	mannosidase, alpha, class 1A, member 2 [Source:HGNC Symbol;Acc:6822]	1	p12	1	117910071	118071494	9667	0.561184	9.77956	3.95932	0.0466126	0.99989
ENSG00000127831	VIL1	villin 1 [Source:HGNC Symbol;Acc:12690]	2	q35	1	219283815	219318018	6920	-0.517075	7.96015	3.9559	0.0467074	0.99989
ENSG00000126870	WDR60	WD repeat domain 60 [Source:HGNC Symbol;Acc:21862]	7	q36.3	1	158649269	158749438	6667	0.604986	5.23017	3.93963	0.0471611	0.99989
ENSG00000115355	CCDC88A	coiled-coil domain containing 88A [Source:HGNC Symbol;Acc:25523]	2	p16.1	-1	55514978	55647057	14537	0.536278	5.87958	3.9283	0.0474798	0.99989
ENSG00000163644	PPM1K	protein phosphatase, Mg2+/Mn2+ dependent, 1K [Source:HGNC Symbol;Acc:25415]	4	q22.1	-1	89178772	89205921	11371	0.725515	4.11768	3.90379	0.0481772	0.99989
ENSG00000198000	NOL8	nucleolar protein 8 [Source:HGNC Symbol;Acc:23387]	9	q22.31	-1	95059640	95087918	8056	0.542736	5.19644	3.88963	0.0485852	0.99989
ENSG00000145734	BDP1	B double prime 1, subunit of RNA polymerase III transcription initiation factor IIIB [Source:HGNC Symbol;Acc:13652]	5	q13.2	1	70751442	70863649	12438	0.650842	5.49148	3.8712	0.0491215	0.99989
ENSG00000108100	CCNY	cyclin Y [Source:HGNC Symbol;Acc:23354]	10	p11.21	1	35535953	35860852	4998	-0.441363	8.10868	3.8639	0.0493354	0.99989
ENSG00000130402	ACTN4	actinin, alpha 4 [Source:HGNC Symbol;Acc:166]	19	q13.2	1	39138289	39222223	6103	-0.609664	4.7028	3.85748	0.0495247	0.99989
ENSG00000128266	GNAZ	guanine nucleotide binding protein (G protein), alpha z polypeptide [Source:HGNC Symbol;Acc:4395]	22	q11.22	1	23412540	23467224	3847	-0.496822	6.01472	3.85327	0.049649	0.99989
ENSG00000250878	METTL21EP	methyltransferase like 21E, pseudogene [Source:HGNC Symbol;Acc:41948]	13	q33.1	1	103532449	103548383	2337	-0.667043	4.33399	3.85024	0.049739	0.99989
ENSG00000154856	APCDD1	adenomatosis polyposis coli down-regulated 1 [Source:HGNC Symbol;Acc:15718]	18	p11.22	1	10454625	10489945	5943	-0.635677	4.1535	3.84386	0.0499286	0.99989
ENSG00000013306	SLC25A39	solute carrier family 25, member 39 [Source:HGNC Symbol;Acc:24279]	17	q21.31	-1	42396993	42402238	3526	-0.619363	5.89685	3.83849	0.0500885	0.99989
ENSG00000024862	CCDC28A	coiled-coil domain containing 28A [Source:HGNC Symbol;Acc:21098]	6	q24.1	1	139094657	139114456	1496	0.584452	4.4139	3.82807	0.050401	0.99989
ENSG00000115457	IGFBP2	insulin-like growth factor binding protein 2, 36kDa [Source:HGNC Symbol;Acc:5471]	2	q35	1	217497551	217529159	4767	-0.892989	5.6717	3.82203	0.0505831	0.99989
ENSG00000108883	EFTUD2	elongation factor Tu GTP binding domain containing 2 [Source:HGNC Symbol;Acc:30858]	17	q21.31	-1	42927311	42977030	10375	-0.422521	7.39095	3.81404	0.0508248	0.99989
ENSG00000140479	PCSK6	proprotein convertase subtilisin/kexin type 6 [Source:HGNC Symbol;Acc:8569]	15	q26.3	-1	101840818	102065405	9348	-0.525959	9.24239	3.8098	0.0509535	0.99989
ENSG00000104218	CSPP1	centrosome and spindle pole associated protein 1 [Source:HGNC Symbol;Acc:26193]	8	q13.1	1	67974661	68108498	7024	0.493761	5.32044	3.79835	0.0513031	0.99989
ENSG00000103187	COTL1	coactosin-like 1 (Dictyostelium) [Source:HGNC Symbol;Acc:18304]	16	q24.1	-1	84599200	84651683	6742	-0.385455	8.57102	3.79597	0.0513762	0.99989
ENSG00000105329	TGFB1	transforming growth factor, beta 1 [Source:HGNC Symbol;Acc:11766]	19	q13.2	-1	41807492	41859816	3238	-0.647321	9.71028	3.79577	0.0513823	0.99989
ENSG00000185015	CA13	carbonic anhydrase XIII [Source:HGNC Symbol;Acc:14914]	8	q21.2	1	86132816	86196302	5528	-0.618011	4.98263	3.79331	0.0514578	0.99989
ENSG00000140307	GTF2A2	general transcription factor IIA, 2, 12kDa [Source:HGNC Symbol;Acc:4647]	15	q22.2	-1	59930261	59949740	3204	0.481305	6.519	3.77194	0.052119	0.99989
ENSG00000119280	C1orf198	chromosome 1 open reading frame 198 [Source:HGNC Symbol;Acc:25900]	1	q42.2	-1	230972865	231005335	5161	-0.509693	6.12802	3.75387	0.0526853	0.99989
ENSG00000138778	CENPE	centromere protein E, 312kDa [Source:HGNC Symbol;Acc:1856]	4	q24	-1	104026963	104119566	9444	0.652558	4.62481	3.73572	0.0532608	0.99989
ENSG00000100266	PACSIN2	protein kinase C and casein kinase substrate in neurons 2 [Source:HGNC Symbol;Acc:8571]	22	q13.2	-1	43231418	43411151	4545	-0.388402	7.55383	3.73314	0.053343	0.99989
ENSG00000168003	SLC3A2	solute carrier family 3 (amino acid transporter heavy chain), member 2 [Source:HGNC Symbol;Acc:11026]	11	q12.3	1	62623518	62656352	5239	-0.640678	5.49562	3.72929	0.0534662	0.99989
ENSG00000085224	ATRX	alpha thalassemia/mental retardation syndrome X-linked [Source:HGNC Symbol;Acc:886]	X	q21.1	-1	76760356	77041702	12224	0.355408	7.59053	3.71264	0.0540019	0.99989
ENSG00000047644	WWC3	WWC family member 3 [Source:HGNC Symbol;Acc:29237]	X	p22.2	1	9983602	10112518	7114	-0.514548	5.72069	3.70811	0.0541487	0.99989
ENSG00000182670	TTC3	tetratricopeptide repeat domain 3 [Source:HGNC Symbol;Acc:12393]	21	q22.13	1	38445526	38575413	15883	0.427727	7.27869	3.70024	0.0544045	0.99989
ENSG00000134996	OSTF1	osteoclast stimulating factor 1 [Source:HGNC Symbol;Acc:8510]	9	q21.13	1	77703459	77762181	1319	-0.336235	9.01937	3.69048	0.0547239	0.99989
ENSG00000074266	EED	embryonic ectoderm development [Source:HGNC Symbol;Acc:3188]	11	q14.2	1	85955586	85989855	7016	0.766682	3.96287	3.67948	0.0550862	0.99989
ENSG00000151779	NBAS	neuroblastoma amplified sequence [Source:HGNC Symbol;Acc:15625]	2	p24.3	-1	15307032	15701454	8949	0.390264	6.55174	3.66295	0.0556351	0.99989
ENSG00000155657	TTN	titin [Source:HGNC Symbol;Acc:12403]	2	q31.2	-1	179390716	179695529	118327	1.09082	5.85215	3.64213	0.056335	0.99989
ENSG00000264538			17	q11.2	1	29036317	29117926	3776	0.608527	4.67531	3.63841	0.056461	0.99989
ENSG00000158578	ALAS2	aminolevulinate, delta-, synthase 2 [Source:HGNC Symbol;Acc:397]	X	p11.21	-1	55035488	55057497	2134	-1.22235	4.10971	3.63803	0.0564738	0.99989
ENSG00000100749	VRK1	vaccinia related kinase 1 [Source:HGNC Symbol;Acc:12718]	14	q32.2	1	97263641	97398059	2744	0.475023	5.05029	3.63522	0.0565693	0.99989
ENSG00000204272			X	p11.21	1	56755692	56844813	1529	-0.463599	5.41716	3.62346	0.0569703	0.99989
ENSG00000172766	NAA16	N(alpha)-acetyltransferase 16, NatA auxiliary subunit [Source:HGNC Symbol;Acc:26164]	13	q14.11	1	41885341	41951166	5867	0.401944	4.8961	3.62116	0.0570489	0.99989
ENSG00000047849	MAP4	microtubule-associated protein 4 [Source:HGNC Symbol;Acc:6862]	3	p21.31	-1	47892182	48130769	14901	0.806934	3.88082	3.6206	0.0570682	0.99989
ENSG00000107874	CUEDC2	CUE domain containing 2 [Source:HGNC Symbol;Acc:28352]	10	q24.32	-1	104183002	104192418	1412	0.693756	4.21869	3.61743	0.057177	0.99989
ENSG00000105499	PLA2G4C	phospholipase A2, group IVC (cytosolic, calcium-independent) [Source:HGNC Symbol;Acc:9037]	19	q13.33	-1	48551100	48614074	6613	-0.591417	5.21037	3.60719	0.0575304	0.99989
ENSG00000104131	EIF3J	eukaryotic translation initiation factor 3, subunit J [Source:HGNC Symbol;Acc:3270]	15	q21.1	1	44829255	44855227	3195	0.499781	8.07363	3.59223	0.0580502	0.99989
ENSG00000260017			16	p12.3	1	18814405	18823503	361	-0.500134	6.12952	3.58345	0.0583578	0.99989
ENSG00000143156	NME7	NME/NM23 family member 7 [Source:HGNC Symbol;Acc:20461]	1	q24.2	-1	169101769	169337205	5737	0.824249	4.31669	3.58038	0.0584657	0.99989
ENSG00000032219	ARID4A	AT rich interactive domain 4A (RBP1-like) [Source:HGNC Symbol;Acc:9885]	14	q23.1	1	58765103	58840605	7568	0.580323	6.12717	3.57956	0.0584948	0.99989
ENSG00000119707	RBM25	RNA binding motif protein 25 [Source:HGNC Symbol;Acc:23244]	14	q24.2	1	73525144	73588122	9375	0.672982	6.14382	3.57378	0.0586984	0.99989
ENSG00000124795	DEK	DEK oncogene [Source:HGNC Symbol;Acc:2768]	6	p22.3	-1	18224099	18265054	4361	0.421981	8.75827	3.56058	0.0591669	0.99989
ENSG00000143401	ANP32E	acidic (leucine-rich) nuclear phosphoprotein 32 family, member E [Source:HGNC Symbol;Acc:16673]	1	q21.2	-1	150190717	150208504	3607	0.559665	4.05638	3.5567	0.0593056	0.99989
ENSG00000163041	H3F3A	H3 histone, family 3A [Source:HGNC Symbol;Acc:4764]	1	q42.12	1	226249552	226259702	3146	0.570222	5.8096	3.5359	0.0600539	0.99989
ENSG00000112159	MDN1	MDN1, midasin homolog (yeast) [Source:HGNC Symbol;Acc:18302]	6	q15	-1	90352218	90529442	18602	1.05697	4.36987	3.52491	0.0604531	0.99989
ENSG00000152818	UTRN	utrophin [Source:HGNC Symbol;Acc:12635]	6	q24.2	1	144606837	145174170	14405	0.409096	8.21664	3.51788	0.0607099	0.99989
ENSG00000135655	USP15	ubiquitin specific peptidase 15 [Source:HGNC Symbol;Acc:12613]	12	q14.1	1	62654119	62811211	9160	0.401966	7.30809	3.50631	0.0611356	0.99989
ENSG00000182087	TMEM259	transmembrane protein 259 [Source:HGNC Symbol;Acc:17039]	19	p13.3	-1	1009647	1021117	3974	0.786135	4.97546	3.5046	0.0611986	0.99989
ENSG00000130985	UBA1	ubiquitin-like modifier activating enzyme 1 [Source:HGNC Symbol;Acc:12469]	X	p11.23	1	47050260	47074527	6437	-0.306393	7.01613	3.4966	0.0614951	0.99989
ENSG00000148180	GSN	gelsolin [Source:HGNC Symbol;Acc:4620]	9	q33.2	1	123970072	124095121	11097	-0.412151	9.68148	3.4956	0.061532	0.99989
ENSG00000005700	IBTK	inhibitor of Bruton agammaglobulinemia tyrosine kinase [Source:HGNC Symbol;Acc:17853]	6	q14.1	-1	82879700	82957471	8722	0.737287	4.42504	3.49137	0.0616895	0.99989
ENSG00000020426	MNAT1	MNAT CDK-activating kinase assembly factor 1 [Source:HGNC Symbol;Acc:7181]	14	q23.1	1	61201460	61436671	3865	0.529363	4.66793	3.48786	0.0618206	0.99989
ENSG00000072518	MARK2	MAP/microtubule affinity-regulating kinase 2 [Source:HGNC Symbol;Acc:3332]	11	q13.1	1	63606400	63678491	6154	-0.610528	5.04758	3.48574	0.0618997	0.99989
ENSG00000144747	TMF1	TATA element modulatory factor 1 [Source:HGNC Symbol;Acc:11870]	3	p14.1	-1	69068978	69101484	7038	0.457522	6.01838	3.4704	0.0624763	0.99989
ENSG00000005812	FBXL3	F-box and leucine-rich repeat protein 3 [Source:HGNC Symbol;Acc:13599]	13	q22.3	-1	77566740	77601330	4651	-0.537354	4.52491	3.46916	0.0625232	0.99989
ENSG00000184792	OSBP2	oxysterol binding protein 2 [Source:HGNC Symbol;Acc:8504]	22	q12.2	1	31089769	31303811	6820	-0.731854	7.06184	3.46528	0.0626697	0.99989
ENSG00000111786	SRSF9	serine/arginine-rich splicing factor 9 [Source:HGNC Symbol;Acc:10791]	12	q24.31	-1	120899471	120907596	3744	-0.3847	5.97774	3.46402	0.0627178	0.99989
ENSG00000120451	SNX19	sorting nexin 19 [Source:HGNC Symbol;Acc:21532]	11	q24.3	-1	130745331	130786404	8154	0.680748	4.20297	3.46295	0.0627584	0.99989
ENSG00000204397	CARD16	caspase recruitment domain family, member 16 [Source:HGNC Symbol;Acc:33701]	11	q22.3	-1	104912053	104972158	1688	-0.458821	7.07766	3.46086	0.0628376	0.99989
ENSG00000134900	TPP2	tripeptidyl peptidase II [Source:HGNC Symbol;Acc:12016]	13	q33.1	1	103249353	103331521	5965	0.331458	7.48613	3.45631	0.0630107	0.99989
ENSG00000100442	FKBP3	FK506 binding protein 3, 25kDa [Source:HGNC Symbol;Acc:3719]	14	q21.2	-1	45584803	45604522	2262	0.421707	5.58558	3.4544	0.0630835	0.99989
ENSG00000107581	EIF3A	eukaryotic translation initiation factor 3, subunit A [Source:HGNC Symbol;Acc:3271]	10	q26.11	-1	120794356	120840316	6048	0.545396	6.24367	3.45376	0.0631079	0.99989
ENSG00000135597	REPS1	RALBP1 associated Eps domain containing 1 [Source:HGNC Symbol;Acc:15578]	6	q24.1	-1	139224630	139309398	9602	0.676109	5.01809	3.45367	0.0631116	0.99989
ENSG00000144674	GOLGA4	golgin A4 [Source:HGNC Symbol;Acc:4427]	3	p22.2	1	37284668	37408242	10723	0.56019	5.78948	3.44709	0.0633633	0.99989
ENSG00000055332	EIF2AK2	eukaryotic translation initiation factor 2-alpha kinase 2 [Source:HGNC Symbol;Acc:9437]	2	p22.2	-1	37326353	37384208	10753	0.738139	4.92761	3.44471	0.0634547	0.99989
ENSG00000110395	CBL	Cbl proto-oncogene, E3 ubiquitin protein ligase [Source:HGNC Symbol;Acc:1541]	11	q23.3	1	119076752	119178859	11465	-0.557463	4.51953	3.41052	0.0647821	0.99989
ENSG00000079263	SP140	SP140 nuclear body protein [Source:HGNC Symbol;Acc:17133]	2	q37.1	1	231067826	231223762	5829	0.908989	5.05467	3.39304	0.065472	0.99989
ENSG00000138031	ADCY3	adenylate cyclase 3 [Source:HGNC Symbol;Acc:234]	2	p23.3	-1	25042038	25142708	6058	-0.736278	5.7256	3.38285	0.0658781	0.99989
ENSG00000064933	PMS1	PMS1 postmeiotic segregation increased 1 (S. cerevisiae) [Source:HGNC Symbol;Acc:9121]	2	q32.2	1	190649107	190742355	5152	0.636194	4.76117	3.38003	0.0659909	0.99989
ENSG00000185052	SLC24A3	solute carrier family 24 (sodium/potassium/calcium exchanger), member 3 [Source:HGNC Symbol;Acc:10977]	20	p11.23	1	19193290	19703581	3929	-0.541084	6.37718	3.37692	0.0661155	0.99989
ENSG00000004059	ARF5	ADP-ribosylation factor 5 [Source:HGNC Symbol;Acc:658]	7	q32.1	1	127228399	127231759	1871	-0.338784	7.76347	3.37438	0.0662174	0.99989
ENSG00000119185	ITGB1BP1	integrin beta 1 binding protein 1 [Source:HGNC Symbol;Acc:23927]	2	p25.1	-1	9543604	9563676	6678	-0.489968	5.08403	3.35872	0.0668501	0.99989
ENSG00000117859	OSBPL9	oxysterol binding protein-like 9 [Source:HGNC Symbol;Acc:16386]	1	p32.3	1	52042851	52254889	9798	0.590002	5.25816	3.35329	0.0670707	0.99989
ENSG00000066777	ARFGEF1	ADP-ribosylation factor guanine nucleotide-exchange factor 1 (brefeldin A-inhibited) [Source:HGNC Symbol;Acc:15772]	8	q13.2	-1	68085747	68255912	10970	0.5218	5.38654	3.33742	0.0677209	0.99989
ENSG00000089053	ANAPC5	anaphase promoting complex subunit 5 [Source:HGNC Symbol;Acc:15713]	12	q24.31	-1	121746048	121837699	12304	-0.338006	9.82169	3.3356	0.0677957	0.99989
ENSG00000149476	DAK	dihydroxyacetone kinase 2 homolog (S. cerevisiae) [Source:HGNC Symbol;Acc:24552]	11	q12.2	1	61100682	61120767	8136	-0.563716	4.3984	3.33366	0.0678755	0.99989
ENSG00000162664	ZNF326	zinc finger protein 326 [Source:HGNC Symbol;Acc:14104]	1	p22.2	1	90460671	90501090	10984	0.454411	5.16199	3.3303	0.0680143	0.99989
ENSG00000111142	METAP2	methionyl aminopeptidase 2 [Source:HGNC Symbol;Acc:16672]	12	q22	1	95867296	95909615	4491	0.530695	4.86125	3.33007	0.0680241	0.99989
ENSG00000050130	JKAMP	JNK1/MAPK8-associated membrane protein [Source:HGNC Symbol;Acc:20184]	14	q23.1	1	59951161	59972128	4350	0.504995	6.03802	3.32413	0.0682699	0.99989
ENSG00000006638	TBXA2R	thromboxane A2 receptor [Source:HGNC Symbol;Acc:11608]	19	p13.3	-1	3594504	3606838	2793	-0.479842	4.93447	3.30777	0.0689532	0.99989
ENSG00000147065	MSN	moesin [Source:HGNC Symbol;Acc:7373]	X	q12	1	64808257	64961791	5969	-0.325826	10.1358	3.30416	0.0691046	0.99989
ENSG00000107819	SFXN3	sideroflexin 3 [Source:HGNC Symbol;Acc:16087]	10	q24.31	1	102790991	102800998	4628	-0.5154	5.1033	3.30183	0.0692028	0.99989
ENSG00000099804	CDC34	cell division cycle 34 [Source:HGNC Symbol;Acc:1734]	19	p13.3	1	531714	542097	2172	-0.40824	4.83284	3.29721	0.0693976	0.99989
ENSG00000180694	TMEM64	transmembrane protein 64 [Source:HGNC Symbol;Acc:25441]	8	q21.3	-1	91634223	91803860	5870	-0.488075	5.19257	3.28376	0.0699684	0.99989
ENSG00000118007	STAG1	stromal antigen 1 [Source:HGNC Symbol;Acc:11354]	3	q22.3	-1	136055077	136471220	7819	-0.431944	5.7116	3.28167	0.0700578	0.99989
ENSG00000176871	WSB2	WD repeat and SOCS box containing 2 [Source:HGNC Symbol;Acc:19222]	12	q24.23	-1	118470712	118500235	3537	-0.470735	6.1619	3.27762	0.0702306	0.99989
ENSG00000231725	VN1R110P	vomeronasal 1 receptor 110 pseudogene [Source:HGNC Symbol;Acc:37438]	X	p11.23	1	48494553	48495523	971	0.597164	4.0663	3.27476	0.0703532	0.99989
ENSG00000162924	REL	v-rel avian reticuloendotheliosis viral oncogene homolog [Source:HGNC Symbol;Acc:9954]	2	p16.1	1	61108656	61158745	11255	0.595918	4.35501	3.26834	0.070629	0.99989
ENSG00000104517	UBR5	ubiquitin protein ligase E3 component n-recognin 5 [Source:HGNC Symbol;Acc:16806]	8	q22.3	-1	103265240	103425069	13085	0.519737	5.2257	3.25198	0.0713373	0.99989
ENSG00000138801	PAPSS1	3'-phosphoadenosine 5'-phosphosulfate synthase 1 [Source:HGNC Symbol;Acc:8603]	4	q25	-1	108511433	108641608	3478	-0.378476	6.22127	3.24588	0.0716031	0.99989
ENSG00000119048	UBE2B	ubiquitin-conjugating enzyme E2B [Source:HGNC Symbol;Acc:12473]	5	q31.1	1	133706870	133727683	3291	0.418553	6.80471	3.23928	0.0718923	0.99989
ENSG00000127914	AKAP9	A kinase (PRKA) anchor protein 9 [Source:HGNC Symbol;Acc:379]	7	q21.2	1	91570181	91739987	18177	0.40934	7.94575	3.23882	0.0719122	0.99989
ENSG00000213639	PPP1CB	protein phosphatase 1, catalytic subunit, beta isozyme [Source:HGNC Symbol;Acc:9282]	2	p23.2	1	28974506	29025806	5760	-0.501509	4.71422	3.23862	0.0719212	0.99989
ENSG00000062194	GPBP1	GC-rich promoter binding protein 1 [Source:HGNC Symbol;Acc:29520]	5	q11.2	1	56469775	56560506	6493	0.334378	6.83548	3.23842	0.0719298	0.99989
ENSG00000083535	PIBF1	progesterone immunomodulatory binding factor 1 [Source:HGNC Symbol;Acc:23352]	13	q22.1	1	73356197	73590591	3669	0.633401	4.52545	3.23632	0.0720221	0.99989
ENSG00000198231	DDX42	DEAD (Asp-Glu-Ala-Asp) box helicase 42 [Source:HGNC Symbol;Acc:18676]	17	q23.3	1	61850963	61896677	8521	0.682071	4.02578	3.22899	0.0723452	0.99989
ENSG00000136436	CALCOCO2	calcium binding and coiled-coil domain 2 [Source:HGNC Symbol;Acc:29912]	17	q21.32	1	46908350	46943884	8333	-0.393186	6.59362	3.22828	0.0723765	0.99989
ENSG00000154122	ANKH	ANKH inorganic pyrophosphate transport regulator [Source:HGNC Symbol;Acc:15492]	5	p15.2	-1	14704910	14871887	10868	-0.475363	5.05583	3.22001	0.0727432	0.99989
ENSG00000069248	NUP133	nucleoporin 133kDa [Source:HGNC Symbol;Acc:18016]	1	q42.13	-1	229577045	229644103	5057	0.824381	4.1803	3.21559	0.0729397	0.99989
ENSG00000102158	MAGT1	magnesium transporter 1 [Source:HGNC Symbol;Acc:28880]	X	q21.1	-1	77081861	77151090	4862	-0.729178	4.12793	3.21373	0.0730226	0.99989
ENSG00000103275	UBE2I	ubiquitin-conjugating enzyme E2I [Source:HGNC Symbol;Acc:12485]	16	p13.3	1	1355548	1377019	12368	0.445316	4.36179	3.20424	0.0734478	0.99989
ENSG00000069275	NUCKS1	nuclear casein kinase and cyclin-dependent kinase substrate 1 [Source:HGNC Symbol;Acc:29923]	1	q32.1	-1	205681947	205719404	6546	0.457119	5.70457	3.20148	0.0735716	0.99989
ENSG00000147443	DOK2	docking protein 2, 56kDa [Source:HGNC Symbol;Acc:2991]	8	p21.3	-1	21766384	21771371	2211	-0.359988	7.95836	3.19463	0.0738803	0.99989
ENSG00000123416	TUBA1B	tubulin, alpha 1b [Source:HGNC Symbol;Acc:18809]	12	q13.12	-1	49521565	49525180	3574	-0.353442	7.35216	3.17518	0.0747651	0.99989
ENSG00000131747	TOP2A	topoisomerase (DNA) II alpha 170kDa [Source:HGNC Symbol;Acc:11989]	17	q21.2	-1	38544768	38574202	6437	0.654451	4.48369	3.17461	0.0747913	0.99989
ENSG00000121390	PSPC1	paraspeckle component 1 [Source:HGNC Symbol;Acc:20320]	13	q12.11	-1	20248896	20357142	3202	0.484576	4.14095	3.17137	0.0749395	0.99989
ENSG00000163714	U2SURP	U2 snRNP-associated SURP domain containing [Source:HGNC Symbol;Acc:30855]	3	q23	1	142683339	142779567	11297	0.590473	6.13635	3.16042	0.0754436	0.99989
ENSG00000156689	GLYATL2	glycine-N-acyltransferase-like 2 [Source:HGNC Symbol;Acc:24178]	11	q12.1	-1	58601542	58671688	1834	-1.0627	5.75874	3.15682	0.0756104	0.99989
ENSG00000112419	PHACTR2	phosphatase and actin regulator 2 [Source:HGNC Symbol;Acc:20956]	6	q24.2	1	143857982	144152322	11224	0.434857	5.52271	3.15522	0.0756845	0.99989
ENSG00000054654	SYNE2	spectrin repeat containing, nuclear envelope 2 [Source:HGNC Symbol;Acc:17084]	14	q23.2	1	64319683	64693165	31405	0.697489	6.99029	3.14755	0.0760409	0.99989
ENSG00000149231	CCDC82	coiled-coil domain containing 82 [Source:HGNC Symbol;Acc:26282]	11	q21	-1	96085933	96123087	6985	0.448113	5.39126	3.14604	0.0761116	0.99989
ENSG00000122591	FAM126A	family with sequence similarity 126, member A [Source:HGNC Symbol;Acc:24587]	7	p15.3	-1	22980878	23053749	6913	-0.528247	5.00633	3.13207	0.0767661	0.99989
ENSG00000143977	SNRPG	small nuclear ribonucleoprotein polypeptide G [Source:HGNC Symbol;Acc:11163]	2	p13.3	-1	70508494	70520903	1795	0.567622	4.431	3.1195	0.0773607	0.99989
ENSG00000126456	IRF3	interferon regulatory factor 3 [Source:HGNC Symbol;Acc:6118]	19	q13.33	-1	50162826	50169132	3794	0.58222	4.158	3.118	0.0774318	0.99989
ENSG00000150076		Homo sapiens coiled-coil domain containing 7 (CCDC7), transcript variant 5, mRNA. [Source:RefSeq mRNA;Acc:NM_024688]	10	p11.22	1	32832297	33171802	3490	0.559854	6.55437	3.11399	0.0776226	0.99989
ENSG00000101639	CEP192	centrosomal protein 192kDa [Source:HGNC Symbol;Acc:25515]	18	p11.21	1	12991361	13125051	9897	0.696398	4.50932	3.11266	0.0776861	0.99989
ENSG00000112576	CCND3	cyclin D3 [Source:HGNC Symbol;Acc:1585]	6	p21.1	-1	41902671	42018095	5300	-0.403331	9.85897	3.11067	0.0777811	0.99989
ENSG00000165775	FUNDC2	FUN14 domain containing 2 [Source:HGNC Symbol;Acc:24925]	X	q28	1	154254255	154288578	10252	-0.429242	5.66542	3.10325	0.0781362	0.99989
ENSG00000111269	CREBL2	cAMP responsive element binding protein-like 2 [Source:HGNC Symbol;Acc:2350]	12	p13.2	1	12764761	12798042	3922	-0.595964	3.93693	3.09408	0.0785777	0.99989
ENSG00000141068	KSR1	kinase suppressor of ras 1 [Source:HGNC Symbol;Acc:6465]	17	q11.1	1	25783670	25953461	11817	1.00177	6.9839	3.08802	0.0788708	0.99989
ENSG00000172531	PPP1CA	protein phosphatase 1, catalytic subunit, alpha isozyme [Source:HGNC Symbol;Acc:9281]	11	q13.2	-1	67165654	67188654	2711	-0.30522	7.39053	3.08346	0.0790921	0.99989
ENSG00000137500	CCDC90B	coiled-coil domain containing 90B [Source:HGNC Symbol;Acc:28108]	11	q14.1	-1	82970139	82997450	6561	0.46079	5.78696	3.08318	0.0791059	0.99989
ENSG00000065357	DGKA	diacylglycerol kinase, alpha 80kDa [Source:HGNC Symbol;Acc:2849]	12	q13.2	1	56321103	56347811	10215	0.582105	6.2729	3.07127	0.0796873	0.99989
ENSG00000142327	RNPEPL1	arginyl aminopeptidase (aminopeptidase B)-like 1 [Source:HGNC Symbol;Acc:10079]	2	q37.3	1	241505221	241520789	7767	0.625223	6.99214	3.06746	0.0798741	0.99989
ENSG00000163297	ANTXR2	anthrax toxin receptor 2 [Source:HGNC Symbol;Acc:21732]	4	q21.21	-1	80822303	81046608	10101	0.433503	6.18668	3.06553	0.0799693	0.99989
ENSG00000172992	DCAKD	dephospho-CoA kinase domain containing [Source:HGNC Symbol;Acc:26238]	17	q21.31	-1	43100708	43138473	2830	-0.550133	4.95434	3.06537	0.0799769	0.99989
ENSG00000113522	RAD50	RAD50 homolog (S. cerevisiae) [Source:HGNC Symbol;Acc:9816]	5	q31.1	1	131891711	131980313	8091	0.351313	6.10133	3.06022	0.0802306	0.99989
ENSG00000173085	COQ2	coenzyme Q2 4-hydroxybenzoate polyprenyltransferase [Source:HGNC Symbol;Acc:25223]	4	q21.23	-1	84182689	84206067	2774	-0.619857	4.27198	3.05796	0.0803423	0.99989
ENSG00000091490	SEL1L3	sel-1 suppressor of lin-12-like 3 (C. elegans) [Source:HGNC Symbol;Acc:29108]	4	p15.2	-1	25749055	25865382	7483	-0.637065	6.15769	3.05409	0.080534	0.99989
ENSG00000137601	NEK1	NIMA-related kinase 1 [Source:HGNC Symbol;Acc:7744]	4	q33	-1	170314426	170533780	7755	0.451623	6.13615	3.05144	0.0806655	0.99989
ENSG00000140829	DHX38	DEAH (Asp-Glu-Ala-His) box polypeptide 38 [Source:HGNC Symbol;Acc:17211]	16	q22.2	1	72127461	72146811	6209	0.542147	4.56167	3.03812	0.0813301	0.99989
ENSG00000138430	OLA1	Obg-like ATPase 1 [Source:HGNC Symbol;Acc:28833]	2	q31.1	-1	174937175	175113426	6100	0.674332	4.61251	3.03544	0.0814645	0.99989
ENSG00000186815	TPCN1	two pore segment channel 1 [Source:HGNC Symbol;Acc:18182]	12	q24.13	1	113658855	113736390	8728	-0.68444	4.81748	3.02526	0.081977	0.99989
ENSG00000142694	EVA1B	eva-1 homolog B (C. elegans) [Source:HGNC Symbol;Acc:25558]	1	p34.3	-1	36787632	36789755	1211	-0.517265	4.38169	3.02084	0.082201	0.99989
ENSG00000165406	2008-03-01	membrane-associated ring finger (C3HC4) 8, E3 ubiquitin protein ligase [Source:HGNC Symbol;Acc:23356]	10	q11.21	-1	45950035	46090354	7537	-0.538773	4.45848	3.02015	0.082236	0.99989
ENSG00000135968	GCC2	GRIP and coiled-coil domain containing 2 [Source:HGNC Symbol;Acc:23218]	2	q12.3	1	109065017	109125871	13282	0.400774	5.54377	3.01639	0.0824269	0.99989
ENSG00000169762	TAPT1	transmembrane anterior posterior transformation 1 [Source:HGNC Symbol;Acc:26887]	4	p15.32	-1	16162128	16229033	7828	-0.532776	4.8229	3.01631	0.0824307	0.99989
ENSG00000161813	LARP4	La ribonucleoprotein domain family, member 4 [Source:HGNC Symbol;Acc:24320]	12	q13.12	1	50786166	50873787	8102	0.536212	5.12489	3.01485	0.0825053	0.99989
ENSG00000105053	VRK3	vaccinia related kinase 3 [Source:HGNC Symbol;Acc:18996]	19	q13.33	-1	50479724	50529203	9796	-0.429193	5.47879	3.01475	0.0825101	0.99989
ENSG00000182500	ORAI1	ORAI calcium release-activated calcium modulator 1 [Source:HGNC Symbol;Acc:25896]	12	q24.31	1	122064455	122080583	2263	-0.540473	5.44654	3.00817	0.0828457	0.99989
ENSG00000138363	ATIC	5-aminoimidazole-4-carboxamide ribonucleotide formyltransferase/IMP cyclohydrolase [Source:HGNC Symbol;Acc:794]	2	q35	1	216176540	216214487	3919	0.503326	5.12195	3.00507	0.0830045	0.99989
ENSG00000124207	CSE1L	CSE1 chromosome segregation 1-like (yeast) [Source:HGNC Symbol;Acc:2431]	20	q13.13	1	47662849	47713489	3726	0.539972	5.42085	3.00438	0.0830398	0.99989
ENSG00000116489	CAPZA1	capping protein (actin filament) muscle Z-line, alpha 1 [Source:HGNC Symbol;Acc:1488]	1	p13.2	1	113161795	113214241	4130	-0.33354	7.19203	2.9979	0.0833723	0.99989
ENSG00000135315	KIAA1009	KIAA1009 [Source:HGNC Symbol;Acc:21107]	6	q14.3	-1	84833960	84937353	5418	0.399642	7.14803	2.99443	0.0835516	0.99989
ENSG00000165669	FAM204A	family with sequence similarity 204, member A [Source:HGNC Symbol;Acc:25794]	10	q26.11	-1	120065401	120101840	7059	0.32466	6.02916	2.98472	0.0840538	0.99989
ENSG00000072818	ACAP1	ArfGAP with coiled-coil, ankyrin repeat and PH domains 1 [Source:HGNC Symbol;Acc:16467]	17	p13.1	1	7239848	7254797	7421	0.562889	6.64082	2.98258	0.0841651	0.99989
ENSG00000227507	LTB	lymphotoxin beta (TNF superfamily, member 3) [Source:HGNC Symbol;Acc:6711]	6	p21.33	-1	31548302	31550299	1535	0.703207	5.98223	2.982	0.0841952	0.99989
ENSG00000081059	TCF7	transcription factor 7 (T-cell specific, HMG-box) [Source:HGNC Symbol;Acc:11639]	5	q31.1	1	133450402	133487556	10063	0.768245	4.35952	2.97962	0.0843192	0.99989
ENSG00000198399	ITSN2	intersectin 2 [Source:HGNC Symbol;Acc:6184]	2	p23.3	-1	24425733	24583583	12014	0.38198	7.43804	2.97627	0.084494	0.99989
ENSG00000108848	LUC7L3	LUC7-like 3 (S. cerevisiae) [Source:HGNC Symbol;Acc:24309]	17	q21.33	1	48796905	48833574	8151	0.44175	7.40104	2.96925	0.0848612	0.99989
ENSG00000054118	THRAP3	thyroid hormone receptor associated protein 3 [Source:HGNC Symbol;Acc:22964]	1	p34.3	1	36690017	36770958	4736	0.393114	5.19588	2.96607	0.0850283	0.99989
ENSG00000170802	FOXN2	forkhead box N2 [Source:HGNC Symbol;Acc:5281]	2	p16.3	1	48541776	48606433	5481	0.493809	4.44122	2.94372	0.0862119	0.99989
ENSG00000239213			3	q22.3	-1	136560568	136580896	1429	-0.530796	4.85922	2.93579	0.0866361	0.99989
ENSG00000132906	CASP9	caspase 9, apoptosis-related cysteine peptidase [Source:HGNC Symbol;Acc:1511]	1	p36.21	-1	15817327	15853029	5269	-0.482053	4.25497	2.93002	0.0869463	0.99989
ENSG00000106244	PDAP1	PDGFA associated protein 1 [Source:HGNC Symbol;Acc:14634]	7	q22.1	-1	98989671	99006452	2854	0.381005	4.26583	2.92294	0.0873285	0.99989
ENSG00000167657	DAPK3	death-associated protein kinase 3 [Source:HGNC Symbol;Acc:2676]	19	p13.3	-1	3958451	3971121	3549	-0.528378	4.0748	2.91872	0.0875575	0.99989
ENSG00000167553	TUBA1C	tubulin, alpha 1c [Source:HGNC Symbol;Acc:20768]	12	q13.12	1	49582519	49667114	3359	-0.409129	5.89831	2.90004	0.0885775	0.99989
ENSG00000255079			11	p11.2	-1	44716413	44717851	789	-0.554611	4.36512	2.89485	0.0888629	0.99989
ENSG00000120690	ELF1	E74-like factor 1 (ets domain transcription factor) [Source:HGNC Symbol;Acc:3316]	13	q14.11	-1	41506056	41635576	4401	0.412195	9.07693	2.89417	0.0889005	0.99989
ENSG00000135976	ANKRD36	ankyrin repeat domain 36 [Source:HGNC Symbol;Acc:24079]	2	q11.2	1	97779233	97930258	10693	0.642004	6.24604	2.88805	0.0892389	0.99989
ENSG00000147099	HDAC8	histone deacetylase 8 [Source:HGNC Symbol;Acc:13315]	X	q13.1	-1	71549366	71792953	5386	0.686961	6.98658	2.88749	0.0892698	0.99989
ENSG00000169249	ZRSR2	zinc finger (CCCH type), RNA-binding motif and serine/arginine rich 2 [Source:HGNC Symbol;Acc:23019]	X	p22.2	1	15808595	15841383	2077	0.543739	4.85894	2.88687	0.0893043	0.99989
ENSG00000130816	DNMT1	DNA (cytosine-5-)-methyltransferase 1 [Source:HGNC Symbol;Acc:2976]	19	p13.2	-1	10244021	10341962	9805	0.313373	7.92233	2.88659	0.08932	0.99989
ENSG00000142089	IFITM3	interferon induced transmembrane protein 3 [Source:HGNC Symbol;Acc:5414]	11	p15.5	-1	319669	327537	1348	0.58216	5.67317	2.88638	0.0893313	0.99989
ENSG00000125875	TBC1D20	TBC1 domain family, member 20 [Source:HGNC Symbol;Acc:16133]	20	p13	-1	416124	443197	5831	-0.382013	6.04556	2.8681	0.0903516	0.99989
ENSG00000067596	DHX8	DEAH (Asp-Glu-Ala-His) box polypeptide 8 [Source:HGNC Symbol;Acc:2749]	17	q21.31	1	41561233	41621831	9302	0.67754	4.10078	2.86196	0.0906968	0.99989
ENSG00000128731	HERC2	HECT and RLD domain containing E3 ubiquitin protein ligase 2 [Source:HGNC Symbol;Acc:4868]	15	q13.1	-1	28356186	28567298	20027	0.521618	4.9416	2.85557	0.0910577	0.99989
ENSG00000162614	NEXN	nexilin (F actin binding protein) [Source:HGNC Symbol;Acc:29557]	1	p31.1	1	78354198	78409580	4624	0.445848	10.3941	2.85416	0.091138	0.99989
ENSG00000079616	KIF22	kinesin family member 22 [Source:HGNC Symbol;Acc:6391]	16	p11.2	1	29802040	29816706	4312	0.625949	4.46939	2.84311	0.0917663	0.99989
ENSG00000153922	CHD1	chromodomain helicase DNA binding protein 1 [Source:HGNC Symbol;Acc:1915]	5	q21.1	-1	98190908	98262240	8801	0.537353	5.62061	2.84294	0.091776	0.99989
ENSG00000012223	LTF	lactotransferrin [Source:HGNC Symbol;Acc:6720]	3	p21.31	-1	46477136	46526724	4247	1.84986	4.45226	2.82995	0.092521	0.99989
ENSG00000197894	ADH5	alcohol dehydrogenase 5 (class III), chi polypeptide [Source:HGNC Symbol;Acc:253]	4	q23	-1	99992132	100009952	4863	0.372836	5.39032	2.8165	0.0932994	0.99989
ENSG00000012124	CD22	CD22 molecule [Source:HGNC Symbol;Acc:1643]	19	q13.12	1	35810164	35838258	5839	0.591937	4.39903	2.8162	0.093317	0.99989
ENSG00000108588	CCDC47	coiled-coil domain containing 47 [Source:HGNC Symbol;Acc:24856]	17	q23.3	-1	61822610	61853711	4537	0.733618	4.01234	2.79692	0.0944454	0.99989
ENSG00000147050	KDM6A	lysine (K)-specific demethylase 6A [Source:HGNC Symbol;Acc:12637]	X	p11.3	1	44732757	44971847	6805	0.545218	4.50087	2.79569	0.094518	0.99989
ENSG00000100603	SNW1	SNW domain containing 1 [Source:HGNC Symbol;Acc:16696]	14	q24.3	-1	78183942	78227550	2432	0.340681	6.92134	2.78837	0.0949506	0.99989
ENSG00000115204	MPV17	MpV17 mitochondrial inner membrane protein [Source:HGNC Symbol;Acc:7224]	2	p23.3	-1	27532360	27548547	4653	0.470341	4.1595	2.78161	0.0953522	0.99989
ENSG00000161542	PRPSAP1	phosphoribosyl pyrophosphate synthetase-associated protein 1 [Source:HGNC Symbol;Acc:9466]	17	q25.1	-1	74305567	74380602	6939	-0.474644	4.60713	2.7801	0.095442	0.99989
ENSG00000179344	HLA-DQB1	major histocompatibility complex, class II, DQ beta 1 [Source:HGNC Symbol;Acc:4944]	6	p21.32	-1	32627244	32636160	4904	0.831753	3.79787	2.77921	0.0954953	0.99989
ENSG00000130706	ADRM1	adhesion regulating molecule 1 [Source:HGNC Symbol;Acc:15759]	20	q13.33	1	60877149	60883918	2142	-0.357874	4.82931	2.77043	0.0960204	0.99989
ENSG00000149177	PTPRJ	protein tyrosine phosphatase, receptor type, J [Source:HGNC Symbol;Acc:9673]	11	p11.2	1	48002113	48189670	6880	-0.406191	6.62861	2.7688	0.096118	0.99989
ENSG00000075624	ACTB	actin, beta [Source:HGNC Symbol;Acc:132]	7	p22.1	-1	5566782	5603415	3256	-0.374553	14.2913	2.7672	0.0962143	0.99989
ENSG00000132549	VPS13B	vacuolar protein sorting 13 homolog B (yeast) [Source:HGNC Symbol;Acc:2183]	8	q22.2	1	100025494	100889808	16716	0.452675	5.53485	2.76457	0.0963727	0.99989
ENSG00000116906	GNPAT	glyceronephosphate O-acyltransferase [Source:HGNC Symbol;Acc:4416]	1	q42.2	1	231376953	231413719	3173	-0.424356	5.92521	2.75427	0.096995	0.99989
ENSG00000168002	POLR2G	polymerase (RNA) II (DNA directed) polypeptide G [Source:HGNC Symbol;Acc:9194]	11	q12.3	1	62529016	62534182	1923	-0.321425	7.70032	2.7481	0.0973699	0.99989
ENSG00000104695	PPP2CB	protein phosphatase 2, catalytic subunit, beta isozyme [Source:HGNC Symbol;Acc:9300]	8	p12	-1	30631973	30671830	4516	0.510747	4.44004	2.74233	0.0977221	0.99989
ENSG00000184009	ACTG1	actin, gamma 1 [Source:HGNC Symbol;Acc:144]	17	q25.3	-1	79476997	79490873	2976	-0.348891	10.2943	2.73264	0.0983168	0.99989
ENSG00000229666	MAST4-AS1	MAST4 antisense RNA 1 [Source:HGNC Symbol;Acc:40865]	5	q12.3	-1	66297211	66299781	777	-0.475214	5.33047	2.73146	0.098389	0.99989
ENSG00000088179	PTPN4	protein tyrosine phosphatase, non-receptor type 4 (megakaryocyte) [Source:HGNC Symbol;Acc:9656]	2	q14.2	1	120517207	120741394	12542	0.511164	5.4065	2.72802	0.0986017	0.99989
ENSG00000215302			15	q13.2	1	30762982	30799826	2331	0.636516	4.46151	2.72753	0.0986316	0.99989
ENSG00000022267	FHL1	four and a half LIM domains 1 [Source:HGNC Symbol;Acc:3702]	X	q26.3	1	135229559	135293518	4945	-0.378645	8.66774	2.72699	0.0986649	0.99989
ENSG00000166508	MCM7	minichromosome maintenance complex component 7 [Source:HGNC Symbol;Acc:6950]	7	q22.1	-1	99690351	99699563	4387	0.421136	4.9654	2.72263	0.098935	0.99989
ENSG00000179115	FARSA	phenylalanyl-tRNA synthetase, alpha subunit [Source:HGNC Symbol;Acc:3592]	19	p13.2	-1	13033293	13044851	2435	-0.574056	4.39773	2.71999	0.0990986	0.99989
ENSG00000054282	SDCCAG8	serologically defined colon cancer antigen 8 [Source:HGNC Symbol;Acc:10671]	1	q43	1	243419320	243663394	5353	0.413085	6.86373	2.71756	0.0992499	0.99989
ENSG00000107771	CCSER2	coiled-coil serine-rich protein 2 [Source:HGNC Symbol;Acc:29197]	10	q23.1	1	86088342	86278273	8420	0.342497	6.18398	2.7167	0.0993029	0.99989
ENSG00000167323	STIM1	stromal interaction molecule 1 [Source:HGNC Symbol;Acc:11386]	11	p15.4	1	3875757	4114439	6811	-0.480224	5.64624	2.71415	0.099462	0.99989
ENSG00000128245	YWHAH	tyrosine 3-monooxygenase/tryptophan 5-monooxygenase activation protein, eta [Source:HGNC Symbol;Acc:12853]	22	q12.3	1	32340447	32353590	2453	-0.345704	8.61574	2.71363	0.0994946	0.99989
ENSG00000112977	DAP	death-associated protein [Source:HGNC Symbol;Acc:2672]	5	p15.2	-1	10679342	10761384	3361	-0.457297	6.45396	2.7002	0.100336	0.99989
ENSG00000062485	CS	citrate synthase [Source:HGNC Symbol;Acc:2422]	12	q13.3	-1	56665483	56694176	6402	-0.50079	4.30674	2.69412	0.100719	0.99989
ENSG00000168395	ING5	inhibitor of growth family, member 5 [Source:HGNC Symbol;Acc:19421]	2	q37.3	1	242641450	242668893	8200	0.583038	4.62939	2.69395	0.10073	0.99989
ENSG00000088992	TESC	tescalcin [Source:HGNC Symbol;Acc:26065]	12	q24.22	-1	117476728	117537284	1926	-0.424166	5.19133	2.69295	0.100793	0.99989
ENSG00000124562	SNRPC	small nuclear ribonucleoprotein polypeptide C [Source:HGNC Symbol;Acc:11157]	6	p21.31	1	34725183	34741571	1277	0.421304	4.89724	2.68671	0.101188	0.99989
ENSG00000136929	HEMGN	hemogen [Source:HGNC Symbol;Acc:17509]	9	q22.33	-1	100689073	100707138	2192	0.470415	7.34057	2.68656	0.101198	0.99989
ENSG00000121766	ZCCHC17	zinc finger, CCHC domain containing 17 [Source:HGNC Symbol;Acc:30246]	1	p35.2	1	31769842	31837783	1891	-0.340949	7.24922	2.68547	0.101268	0.99989
ENSG00000062650	WAPAL	wings apart-like homolog (Drosophila) [Source:HGNC Symbol;Acc:23293]	10	q23.2	-1	88195013	88281572	7280	0.374741	5.69084	2.68388	0.101368	0.99989
ENSG00000168172	HOOK3	hook microtubule-tethering protein 3 [Source:HGNC Symbol;Acc:23576]	8	p11.21	1	42752075	42885682	15250	0.366003	7.52475	2.6793	0.101661	0.99989
ENSG00000168175	MAPK1IP1L	mitogen-activated protein kinase 1 interacting protein 1-like [Source:HGNC Symbol;Acc:19840]	14	q22.3	1	55518349	55536910	6988	-0.337706	5.05892	2.67762	0.101768	0.99989
ENSG00000059378	PARP12	poly (ADP-ribose) polymerase family, member 12 [Source:HGNC Symbol;Acc:21919]	7	q34	-1	139723544	139763521	6285	0.758995	4.06263	2.6738	0.102012	0.99989
ENSG00000100815	TRIP11	thyroid hormone receptor interactor 11 [Source:HGNC Symbol;Acc:12305]	14	q32.12	-1	92432335	92507240	10372	0.360181	6.00171	2.66611	0.102506	0.99989
ENSG00000166831	RBPMS2	RNA binding protein with multiple splicing 2 [Source:HGNC Symbol;Acc:19098]	15	q22.31	-1	65032091	65067786	2101	0.764035	5.90908	2.65561	0.103185	0.99989
ENSG00000197969	VPS13A	vacuolar protein sorting 13 homolog A (S. cerevisiae) [Source:HGNC Symbol;Acc:1908]	9	q21.2	1	79792269	80036457	20196	0.384871	6.83416	2.64912	0.103607	0.99989
ENSG00000173473	SMARCC1	SWI/SNF related, matrix associated, actin dependent regulator of chromatin, subfamily c, member 1 [Source:HGNC Symbol;Acc:11104]	3	p21.31	-1	47626762	47823596	7645	0.373515	6.83655	2.64781	0.103692	0.99989
ENSG00000178852	EFCAB13	EF-hand calcium binding domain 13 [Source:HGNC Symbol;Acc:26864]	17	q21.32	1	45400656	45518678	6672	0.555207	7.28855	2.63961	0.104229	0.99989
ENSG00000157978	LDLRAP1	low density lipoprotein receptor adaptor protein 1 [Source:HGNC Symbol;Acc:18640]	1	p36.11	1	25870071	25895377	5397	-0.338477	8.63163	2.63839	0.104309	0.99989
ENSG00000004534	RBM6	RNA binding motif protein 6 [Source:HGNC Symbol;Acc:9903]	3	p21.31	1	49977440	50137478	7300	0.605779	5.40572	2.63207	0.104725	0.99989
ENSG00000156026	MCU	mitochondrial calcium uniporter [Source:HGNC Symbol;Acc:23526]	10	q22.1	1	74451889	74647452	4533	-0.457175	5.29605	2.62719	0.105048	0.99989
ENSG00000122008	POLK	polymerase (DNA directed) kappa [Source:HGNC Symbol;Acc:9183]	5	q13.3	1	74807581	74896969	9105	0.417182	5.14247	2.62418	0.105247	0.99989
ENSG00000136240	KDELR2	KDEL (Lys-Asp-Glu-Leu) endoplasmic reticulum protein retention receptor 2 [Source:HGNC Symbol;Acc:6305]	7	p22.1	-1	6485584	6523873	3990	-0.362499	4.46553	2.62331	0.105305	0.99989
ENSG00000167325	RRM1	ribonucleotide reductase M1 [Source:HGNC Symbol;Acc:10451]	11	p15.4	1	4115937	4160106	4178	0.6549	4.11046	2.62312	0.105317	0.99989
ENSG00000170037	CNTROB	centrobin, centrosomal BRCA2 interacting protein [Source:HGNC Symbol;Acc:29616]	17	p13.1	1	7835419	7853236	6234	-0.437802	4.72806	2.62262	0.10535	0.99989
ENSG00000153015	CWC27	CWC27 spliceosome-associated protein homolog (S. cerevisiae) [Source:HGNC Symbol;Acc:10664]	5	q12.3	1	64064757	64314590	3740	0.462431	5.21588	2.62244	0.105362	0.99989
ENSG00000163655	GMPS	guanine monphosphate synthase [Source:HGNC Symbol;Acc:4378]	3	q25.31	1	155588325	155661815	8885	0.331414	6.64761	2.62095	0.105462	0.99989
ENSG00000100722	ZC3H14	zinc finger CCCH-type containing 14 [Source:HGNC Symbol;Acc:20509]	14	q31.3	1	89029253	89079853	6890	0.451629	4.89124	2.61782	0.105669	0.99989
ENSG00000072110	ACTN1	actinin, alpha 1 [Source:HGNC Symbol;Acc:163]	14	q24.1	-1	69340860	69446157	10626	-0.382695	11.8238	2.61535	0.105834	0.99989
ENSG00000172890	NADSYN1	NAD synthetase 1 [Source:HGNC Symbol;Acc:29832]	11	q13.4	1	71164155	71235153	14970	0.703681	5.40252	2.61335	0.105968	0.99989
ENSG00000111424	VDR	vitamin D (1,25- dihydroxyvitamin D3) receptor [Source:HGNC Symbol;Acc:12679]	12	q13.11	-1	48235320	48336831	5674	-0.553023	4.42086	2.61268	0.106012	0.99989
ENSG00000165434	PGM2L1	phosphoglucomutase 2-like 1 [Source:HGNC Symbol;Acc:20898]	11	q13.4	-1	74041363	74109518	8515	-0.528802	5.33485	2.60926	0.106241	0.99989
ENSG00000011258	MBTD1	mbt domain containing 1 [Source:HGNC Symbol;Acc:19866]	17	q21.33	-1	49254786	49337524	7201	0.403816	7.18164	2.60715	0.106383	0.99989
ENSG00000187742	SECISBP2	SECIS binding protein 2 [Source:HGNC Symbol;Acc:30972]	9	q22.2	1	91933421	91974557	9793	-0.343988	7.78172	2.60477	0.106543	0.99989
ENSG00000196911	KPNA5	karyopherin alpha 5 (importin alpha 6) [Source:HGNC Symbol;Acc:6398]	6	q22.1	1	117002350	117063029	5556	0.507383	6.10397	2.60425	0.106578	0.99989
ENSG00000034510	TMSB10	thymosin beta 10 [Source:HGNC Symbol;Acc:11879]	2	p11.2	1	85132749	85133795	492	0.412335	7.5658	2.5994	0.106904	0.99989
ENSG00000008952	SEC62	SEC62 homolog (S. cerevisiae) [Source:HGNC Symbol;Acc:11846]	3	q26.2	1	169684423	169716161	7928	0.329758	7.59363	2.59211	0.107397	0.99989
ENSG00000138646	HERC5	HECT and RLD domain containing E3 ubiquitin protein ligase 5 [Source:HGNC Symbol;Acc:24368]	4	q22.1	1	89378268	89427314	4766	0.974658	3.95377	2.5921	0.107398	0.99989
ENSG00000105401	CDC37	cell division cycle 37 [Source:HGNC Symbol;Acc:1735]	19	p13.2	-1	10501810	10530797	3041	-0.307397	6.39504	2.58931	0.107587	0.99989
ENSG00000176124	DLEU1	deleted in lymphocytic leukemia 1 (non-protein coding) [Source:HGNC Symbol;Acc:13747]	13	q14.2	1	50656307	51297372	9926	-0.571995	4.04719	2.5887	0.107629	0.99989
ENSG00000160789	LMNA	lamin A/C [Source:HGNC Symbol;Acc:6636]	1	q22	1	156052364	156109880	6985	-0.328308	9.28836	2.58058	0.108182	0.99989
ENSG00000147419	CCDC25	coiled-coil domain containing 25 [Source:HGNC Symbol;Acc:25591]	8	p21.1	-1	27590835	27630170	4408	0.459253	4.351	2.56316	0.10938	0.99989
ENSG00000100461	RBM23	RNA binding motif protein 23 [Source:HGNC Symbol;Acc:20155]	14	q11.2	-1	23369854	23388393	6584	0.406124	5.22323	2.55857	0.109698	0.99989
ENSG00000002549	LAP3	leucine aminopeptidase 3 [Source:HGNC Symbol;Acc:18449]	4	p15.32	1	17578815	17609595	3785	0.534886	5.60339	2.55575	0.109894	0.99989
ENSG00000110422	HIPK3	homeodomain interacting protein kinase 3 [Source:HGNC Symbol;Acc:4915]	11	p13	1	33278218	33378569	7958	-0.438827	6.16204	2.55389	0.110023	0.99989
ENSG00000146007	ZMAT2	zinc finger, matrin-type 2 [Source:HGNC Symbol;Acc:26433]	5	q31.3	1	140078265	140086248	1799	0.388296	6.12396	2.55342	0.110056	0.99989
ENSG00000154917	RAB6B	RAB6B, member RAS oncogene family [Source:HGNC Symbol;Acc:14902]	3	q22.1	-1	133543083	133614680	6005	0.508889	5.93847	2.54232	0.110832	0.99989
ENSG00000133835	HSD17B4	hydroxysteroid (17-beta) dehydrogenase 4 [Source:HGNC Symbol;Acc:5213]	5	q23.1	1	118788138	118972894	8231	-0.514492	5.10387	2.5377	0.111157	0.99989
ENSG00000132530	XAF1	XIAP associated factor 1 [Source:HGNC Symbol;Acc:30932]	17	p13.1	1	6658766	6678966	6668	0.820573	4.06398	2.53146	0.111597	0.99989
ENSG00000119335	SET	SET nuclear oncogene [Source:HGNC Symbol;Acc:10760]	9	q34.11	1	131445703	131458679	4355	-0.28711	6.82408	2.53069	0.111652	0.99989
ENSG00000100307	CBX7	chromobox homolog 7 [Source:HGNC Symbol;Acc:1557]	22	q13.1	-1	39516172	39548679	7461	0.726734	5.11162	2.52816	0.11183	0.99989
ENSG00000183735	TBK1	TANK-binding kinase 1 [Source:HGNC Symbol;Acc:11584]	12	q14.2	1	64845660	64895888	4762	0.665942	5.43617	2.528	0.111842	0.99989
ENSG00000101745	ANKRD12	ankyrin repeat domain 12 [Source:HGNC Symbol;Acc:29135]	18	p11.22	1	9136226	9285983	12269	0.37818	7.31872	2.52407	0.112121	0.99989
ENSG00000204842	ATXN2	ataxin 2 [Source:HGNC Symbol;Acc:10555]	12	q24.12	-1	111890018	112037480	13934	0.39345	5.42349	2.51507	0.112763	0.99989
ENSG00000129003	VPS13C	vacuolar protein sorting 13 homolog C (S. cerevisiae) [Source:HGNC Symbol;Acc:23594]	15	q22.2	-1	62144588	62352672	16791	0.37851	6.8836	2.51499	0.112769	0.99989
ENSG00000204406	MBD5	methyl-CpG binding domain protein 5 [Source:HGNC Symbol;Acc:20444]	2	q23.1	1	148778580	149275805	12933	-0.431976	4.644	2.50775	0.113288	0.99989
ENSG00000013441	CLK1	CDC-like kinase 1 [Source:HGNC Symbol;Acc:2068]	2	q33.1	-1	201717732	201729422	5125	0.673873	5.95544	2.50706	0.113337	0.99989
ENSG00000077097	TOP2B	topoisomerase (DNA) II beta 180kDa [Source:HGNC Symbol;Acc:11990]	3	p24.2	-1	25639475	25706398	5965	0.362427	7.04197	2.50689	0.113349	0.99989
ENSG00000105323	HNRNPUL1	heterogeneous nuclear ribonucleoprotein U-like 1 [Source:HGNC Symbol;Acc:17011]	19	q13.2	1	41768401	41813503	6537	-0.434398	5.17621	2.5012	0.11376	0.99989
ENSG00000165637	VDAC2	voltage-dependent anion channel 2 [Source:HGNC Symbol;Acc:12672]	10	q22.2	1	76969912	76991206	2827	-0.279401	6.59062	2.49621	0.11412	0.99989
ENSG00000136271	DDX56	DEAD (Asp-Glu-Ala-Asp) box helicase 56 [Source:HGNC Symbol;Acc:18193]	7	p13	-1	44605016	44614650	4068	0.663363	4.65085	2.49551	0.114171	0.99989
ENSG00000109171	SLAIN2	SLAIN motif family, member 2 [Source:HGNC Symbol;Acc:29282]	4	p11	1	48343339	48428229	6524	0.424807	7.95615	2.49397	0.114283	0.99989
ENSG00000084072	PPIE	peptidylprolyl isomerase E (cyclophilin E) [Source:HGNC Symbol;Acc:9258]	1	p34.2	1	40157854	40229586	8071	-0.344097	6.17946	2.49321	0.114339	0.99989
ENSG00000064601	CTSA	cathepsin A [Source:HGNC Symbol;Acc:9251]	20	q13.12	1	44518783	44527459	5856	-0.340292	12.3026	2.49278	0.114369	0.99989
ENSG00000163386	NBPF10	neuroblastoma breakpoint family, member 10 [Source:HGNC Symbol;Acc:31992]	1	q21.1	1	145289772	145370303	13221	0.640588	4.68862	2.48897	0.114647	0.99989
ENSG00000110047	EHD1	EH-domain containing 1 [Source:HGNC Symbol;Acc:3242]	11	q13.1	-1	64619114	64655768	7088	-0.309218	6.90383	2.48567	0.114888	0.99989
ENSG00000189136	UBE2Q2P1	ubiquitin-conjugating enzyme E2Q family member 2 pseudogene 1 [Source:HGNC Symbol;Acc:37439]	15	q25.2	-1	85070012	85114447	3008	0.594547	4.9438	2.47643	0.115564	0.99989
ENSG00000116691	MIIP	migration and invasion inhibitory protein [Source:HGNC Symbol;Acc:25715]	1	p36.22	1	12079523	12092102	2821	0.586776	4.10964	2.47611	0.115588	0.99989
ENSG00000124275	MTRR	5-methyltetrahydrofolate-homocysteine methyltransferase reductase [Source:HGNC Symbol;Acc:7473]	5	p15.31	1	7851299	7906138	6498	0.712021	4.27762	2.47444	0.11571	0.99989
ENSG00000163344	PMVK	phosphomevalonate kinase [Source:HGNC Symbol;Acc:9141]	1	q21.3	-1	154897210	154909467	1280	-0.46546	4.21416	2.46176	0.116648	0.99989
ENSG00000105821	DNAJC2	DnaJ (Hsp40) homolog, subfamily C, member 2 [Source:HGNC Symbol;Acc:13192]	7	q22.1	-1	102952921	102985320	6564	0.379318	6.97725	2.46145	0.116671	0.99989
ENSG00000117505	DR1	down-regulator of transcription 1, TBP-binding (negative cofactor 2) [Source:HGNC Symbol;Acc:3017]	1	p22.1	1	93811445	93835055	10949	-0.361159	5.54111	2.45673	0.117022	0.99989
ENSG00000144566	RAB5A	RAB5A, member RAS oncogene family [Source:HGNC Symbol;Acc:9783]	3	p24.3	1	19988571	20026667	3785	0.394255	5.13526	2.44685	0.117761	0.99989
ENSG00000165475	CRYL1	crystallin, lambda 1 [Source:HGNC Symbol;Acc:18246]	13	q12.11	-1	20977806	21099996	1761	-0.331103	7.69709	2.44468	0.117924	0.99989
ENSG00000113163	COL4A3BP	collagen, type IV, alpha 3 (Goodpasture antigen) binding protein [Source:HGNC Symbol;Acc:2205]	5	q13.3	-1	74664311	74807963	8697	0.455622	5.54813	2.44172	0.118146	0.99989
ENSG00000100567	PSMA3	proteasome (prosome, macropain) subunit, alpha type, 3 [Source:HGNC Symbol;Acc:9532]	14	q23.1	1	58711549	58738730	3119	0.391144	5.97066	2.44122	0.118184	0.99989
ENSG00000114867	EIF4G1	eukaryotic translation initiation factor 4 gamma, 1 [Source:HGNC Symbol;Acc:3296]	3	q27.1	1	184032283	184053146	8257	0.423296	5.62164	2.44048	0.11824	0.99989
ENSG00000173230	GOLGB1	golgin B1 [Source:HGNC Symbol;Acc:4429]	3	q13.33	-1	121382046	121468602	11853	0.407279	5.4551	2.43615	0.118567	0.99989
ENSG00000156471	PTDSS1	phosphatidylserine synthase 1 [Source:HGNC Symbol;Acc:9587]	8	q22.1	1	97273943	97349223	6295	-0.418831	5.3745	2.43161	0.11891	0.99989
ENSG00000198911	SREBF2	sterol regulatory element binding transcription factor 2 [Source:HGNC Symbol;Acc:11290]	22	q13.2	1	42229109	42303312	7531	-0.626874	4.78661	2.43033	0.119008	0.99989
ENSG00000166557	TMED3	transmembrane emp24 protein transport domain containing 3 [Source:HGNC Symbol;Acc:28889]	15	q25.1	1	79603404	79704334	2769	-0.394829	5.0994	2.42941	0.119077	0.99989
ENSG00000120742	SERP1	stress-associated endoplasmic reticulum protein 1 [Source:HGNC Symbol;Acc:10759]	3	q25.1	-1	150259781	150321015	5747	-0.249061	6.71491	2.42766	0.119211	0.99989
ENSG00000023697	DERA	deoxyribose-phosphate aldolase (putative) [Source:HGNC Symbol;Acc:24269]	12	p12.3	1	16064106	16190220	2848	-0.373492	8.01327	2.4228	0.119581	0.99989
ENSG00000052126	PLEKHA5	pleckstrin homology domain containing, family A member 5 [Source:HGNC Symbol;Acc:30036]	12	p12.3	1	19282648	19529334	12596	0.439023	5.28265	2.419	0.119871	0.99989
ENSG00000102172	SMS	spermine synthase [Source:HGNC Symbol;Acc:11123]	X	p22.11	1	21958691	22025798	2695	-0.300878	7.41089	2.41801	0.119948	0.99989
ENSG00000145348	TBCK	TBC1 domain containing kinase [Source:HGNC Symbol;Acc:28261]	4	q24	-1	106962756	107242652	11112	0.789516	3.74529	2.40509	0.120941	0.99989
ENSG00000198626	RYR2	ryanodine receptor 2 (cardiac) [Source:HGNC Symbol;Acc:10484]	1	q43	1	237205505	237997288	17799	0.762148	4.08654	2.39805	0.121486	0.99989
ENSG00000174243	DDX23	DEAD (Asp-Glu-Ala-Asp) box polypeptide 23 [Source:HGNC Symbol;Acc:17347]	12	q13.12	-1	49223547	49246625	5419	0.603257	3.95556	2.39166	0.121984	0.99989
ENSG00000162722	TRIM58	tripartite motif containing 58 [Source:HGNC Symbol;Acc:24150]	1	q44	1	248020501	248041507	3225	-0.349139	8.42735	2.38624	0.122408	0.99989
ENSG00000133627	ACTR3B	ARP3 actin-related protein 3 homolog B (yeast) [Source:HGNC Symbol;Acc:17256]	7	q36.1	1	152456834	152552463	6024	-0.343759	7.68799	2.37906	0.122972	0.99989
ENSG00000070540	WIPI1	WD repeat domain, phosphoinositide interacting 1 [Source:HGNC Symbol;Acc:25471]	17	q24.2	-1	66417089	66453654	3402	-0.33456	8.104	2.37889	0.122985	0.99989
ENSG00000163001	CCDC104	coiled-coil domain containing 104 [Source:HGNC Symbol;Acc:30540]	2	p16.1	1	55746740	55773015	3502	0.58508	3.95697	2.37856	0.123011	0.99989
ENSG00000130826	DKC1	dyskeratosis congenita 1, dyskerin [Source:HGNC Symbol;Acc:2890]	X	q28	1	153991031	154005964	4189	0.508168	4.63148	2.3732	0.123434	0.99989
ENSG00000129521	EGLN3	egl-9 family hypoxia-inducible factor 3 [Source:HGNC Symbol;Acc:14661]	14	q13.1	-1	34393437	34931980	7359	0.399989	5.76854	2.37118	0.123594	0.99989
ENSG00000100614	PPM1A	protein phosphatase, Mg2+/Mn2+ dependent, 1A [Source:HGNC Symbol;Acc:9275]	14	q23.1	1	60712470	60765805	11860	-0.359855	7.02788	2.37	0.123687	0.99989
ENSG00000034152	MAP2K3	mitogen-activated protein kinase kinase 3 [Source:HGNC Symbol;Acc:6843]	17	p11.2	1	21187984	21218552	3783	-0.307807	8.54692	2.36968	0.123712	0.99989
ENSG00000114439	BBX	bobby sox homolog (Drosophila) [Source:HGNC Symbol;Acc:14422]	3	q13.12	1	107241783	107530171	11877	0.306492	6.83061	2.36071	0.124426	0.99989
ENSG00000053108	FSTL4	follistatin-like 4 [Source:HGNC Symbol;Acc:21389]	5	q31.1	-1	132532147	132948255	6733	-0.438709	5.37511	2.35599	0.124803	0.99989
ENSG00000075856	SART3	squamous cell carcinoma antigen recognized by T cells 3 [Source:HGNC Symbol;Acc:16860]	12	q23.3	-1	108916357	108955176	7270	0.483835	4.9345	2.35208	0.125116	0.99989
ENSG00000178057	NDUFAF3	NADH dehydrogenase (ubiquinone) complex I, assembly factor 3 [Source:HGNC Symbol;Acc:29918]	3	p21.31	1	49057892	49060928	2434	-0.40225	9.28809	2.35163	0.125152	0.99989
ENSG00000111832	RWDD1	RWD domain containing 1 [Source:HGNC Symbol;Acc:20993]	6	q22.1	1	116892530	116918838	5909	-0.322185	6.18448	2.34319	0.125831	0.99989
ENSG00000122483	CCDC18	coiled-coil domain containing 18 [Source:HGNC Symbol;Acc:30370]	1	p22.1	1	93645476	93744287	5633	0.420584	7.90998	2.3394	0.126138	0.99989
ENSG00000066136	NFYC	nuclear transcription factor Y, gamma [Source:HGNC Symbol;Acc:7806]	1	p34.2	1	41157320	41237275	5990	-0.455108	4.95629	2.33499	0.126495	0.99989
ENSG00000060339	CCAR1	cell division cycle and apoptosis regulator 1 [Source:HGNC Symbol;Acc:24236]	10	q21.3	1	70480769	70552134	6002	0.305532	7.15465	2.32318	0.12746	0.99989
ENSG00000074370	ATP2A3	ATPase, Ca++ transporting, ubiquitous [Source:HGNC Symbol;Acc:813]	17	p13.2	-1	3827169	3867736	6866	-0.527765	8.59063	2.31975	0.127741	0.99989
ENSG00000180304	OAZ2	ornithine decarboxylase antizyme 2 [Source:HGNC Symbol;Acc:8096]	15	q22.31	-1	64979772	64995480	7671	-0.577108	4.35981	2.31385	0.128226	0.99989
ENSG00000144560	VGLL4	vestigial like 4 (Drosophila) [Source:HGNC Symbol;Acc:28966]	3	p25.3	-1	11597544	11762220	6698	-0.363331	5.82063	2.3132	0.12828	0.99989
ENSG00000007264	MATK	megakaryocyte-associated tyrosine kinase [Source:HGNC Symbol;Acc:6906]	19	p13.3	-1	3777971	3802127	4138	-0.61406	4.7696	2.31317	0.128282	0.99989
ENSG00000066044	ELAVL1	ELAV like RNA binding protein 1 [Source:HGNC Symbol;Acc:3312]	19	p13.2	-1	8023463	8070543	6956	-0.343443	4.99445	2.31196	0.128382	0.99989
ENSG00000143891	GALM	galactose mutarotase (aldose 1-epimerase) [Source:HGNC Symbol;Acc:24063]	2	p22.1	1	38893052	38968379	2790	-0.364706	5.7217	2.31127	0.128439	0.99989
ENSG00000104687	GSR	glutathione reductase [Source:HGNC Symbol;Acc:4623]	8	p12	-1	30535583	30585443	3232	-0.346268	6.38218	2.30809	0.128702	0.99989
ENSG00000125457	MIF4GD	MIF4G domain containing [Source:HGNC Symbol;Acc:24030]	17	q25.1	-1	73262309	73267308	2283	-0.324072	6.7299	2.30194	0.129213	0.99989
ENSG00000011009	LYPLA2	lysophospholipase II [Source:HGNC Symbol;Acc:6738]	1	p36.11	1	24117460	24122029	2196	-0.381535	4.87953	2.30192	0.129214	0.99989
ENSG00000107798	LIPA	lipase A, lysosomal acid, cholesterol esterase [Source:HGNC Symbol;Acc:6617]	10	q23.31	-1	90973326	91174314	4940	-0.425754	8.29881	2.30181	0.129223	0.99989
ENSG00000198677	TTC37	tetratricopeptide repeat domain 37 [Source:HGNC Symbol;Acc:23639]	5	q15	-1	94799599	94890711	8092	0.334847	6.91671	2.29982	0.129389	0.99989
ENSG00000140750	ARHGAP17	Rho GTPase activating protein 17 [Source:HGNC Symbol;Acc:18239]	16	p12.1	-1	24930706	25026987	9892	0.583471	4.66589	2.29652	0.129664	0.99989
ENSG00000106976	DNM1	dynamin 1 [Source:HGNC Symbol;Acc:2972]	9	q34.11	1	130965658	131017527	5585	-0.548521	5.37519	2.29591	0.129715	0.99989
ENSG00000101972	STAG2	stromal antigen 2 [Source:HGNC Symbol;Acc:11355]	X	q25	1	123094062	123556514	8187	0.286894	7.64484	2.29405	0.129871	0.99989
ENSG00000102900	NUP93	nucleoporin 93kDa [Source:HGNC Symbol;Acc:28958]	16	q13	1	56764017	56878797	5735	-0.687515	4.48576	2.29042	0.130174	0.99989
ENSG00000164754	RAD21	RAD21 homolog (S. pombe) [Source:HGNC Symbol;Acc:9811]	8	q24.11	-1	117858174	117887105	6192	0.346099	5.38537	2.28719	0.130446	0.99989
ENSG00000138593	SECISBP2L	SECIS binding protein 2-like [Source:HGNC Symbol;Acc:28997]	15	q21.1	-1	49280673	49338760	8699	0.373154	6.22435	2.28692	0.130469	0.99989
ENSG00000198363	ASPH	aspartate beta-hydroxylase [Source:HGNC Symbol;Acc:757]	8	q12.3	-1	62413116	62627155	13632	0.434505	7.56249	2.28222	0.130864	0.99989
ENSG00000088986	DYNLL1	dynein, light chain, LC8-type 1 [Source:HGNC Symbol;Acc:15476]	12	q24.31	1	120907653	120936296	2957	-0.358531	9.42702	2.26745	0.132117	0.99989
ENSG00000114209	PDCD10	programmed cell death 10 [Source:HGNC Symbol;Acc:8761]	3	q26.1	-1	167401086	167452727	3275	0.438529	9.68642	2.26545	0.132288	0.99989
ENSG00000132963	POMP	proteasome maturation protein [Source:HGNC Symbol;Acc:20330]	13	q12.3	1	29233241	29253062	1428	0.348723	6.98068	2.26463	0.132358	0.99989
ENSG00000115317	HTRA2	HtrA serine peptidase 2 [Source:HGNC Symbol;Acc:14348]	2	p13.1	1	74756504	74760472	2998	-0.421508	4.39861	2.26035	0.132724	0.99989
ENSG00000087338	GMCL1	germ cell-less, spermatogenesis associated 1 [Source:HGNC Symbol;Acc:23843]	2	p13.3	1	70056774	70108528	4922	-0.418847	5.33052	2.25574	0.13312	0.99989
ENSG00000113269	RNF130	ring finger protein 130 [Source:HGNC Symbol;Acc:18280]	5	q35.3	-1	179338651	179499118	12822	-0.250975	8.09448	2.25513	0.133172	0.99989
ENSG00000157557	ETS2	v-ets avian erythroblastosis virus E26 oncogene homolog 2 [Source:HGNC Symbol;Acc:3489]	21	q22.2	1	40177231	40196879	4595	-0.557009	3.95998	2.25335	0.133325	0.99989
ENSG00000165417	GTF2A1	general transcription factor IIA, 1, 19/37kDa [Source:HGNC Symbol;Acc:4646]	14	q31.1	-1	81641796	81687721	6819	0.425384	4.41969	2.25156	0.13348	0.99989
ENSG00000113580	NR3C1	nuclear receptor subfamily 3, group C, member 1 (glucocorticoid receptor) [Source:HGNC Symbol;Acc:7978]	5	q31.3	-1	142657496	142815077	9172	0.371995	5.26807	2.2504	0.13358	0.99989
ENSG00000158526	TSR2	TSR2, 20S rRNA accumulation, homolog (S. cerevisiae) [Source:HGNC Symbol;Acc:25455]	X	p11.22	1	54466834	54471920	1534	0.396568	4.15274	2.24976	0.133635	0.99989
ENSG00000154127	UBASH3B	ubiquitin associated and SH3 domain containing B [Source:HGNC Symbol;Acc:29884]	11	q24.1	1	122526383	122685181	9011	-0.401011	5.37883	2.24672	0.133898	0.99989
ENSG00000178980	SEPW1	selenoprotein W, 1 [Source:HGNC Symbol;Acc:10752]	19	q13.33	1	48281829	48287943	5261	-0.314956	7.15345	2.24434	0.134104	0.99989
ENSG00000171497	PPID	peptidylprolyl isomerase D [Source:HGNC Symbol;Acc:9257]	4	q32.1	-1	159630286	159644548	2509	-0.583821	4.45862	2.2399	0.13449	0.99989
ENSG00000114573	ATP6V1A	ATPase, H+ transporting, lysosomal 70kDa, V1 subunit A [Source:HGNC Symbol;Acc:851]	3	q13.2	1	113465866	113530903	5130	-0.442447	5.92456	2.23645	0.13479	0.99989
ENSG00000163946	FAM208A	family with sequence similarity 208, member A [Source:HGNC Symbol;Acc:30314]	3	p14.3	-1	56654161	56717265	9824	0.55698	4.44819	2.22727	0.135593	0.99989
ENSG00000110906	KCTD10	potassium channel tetramerization domain containing 10 [Source:HGNC Symbol;Acc:23236]	12	q24.11	-1	109886461	109915349	9865	0.356475	4.55352	2.21892	0.136328	0.99989
ENSG00000067900	ROCK1	Rho-associated, coiled-coil containing protein kinase 1 [Source:HGNC Symbol;Acc:10251]	18	q11.1	-1	18526867	18691812	11064	0.264323	8.67261	2.21784	0.136424	0.99989
ENSG00000126432	PRDX5	peroxiredoxin 5 [Source:HGNC Symbol;Acc:9355]	11	q13.1	1	64085560	64089283	893	-0.306505	7.73077	2.21319	0.136836	0.99989
ENSG00000159459	UBR1	ubiquitin protein ligase E3 component n-recognin 1 [Source:HGNC Symbol;Acc:16808]	15	q15.2	-1	43235095	43398311	9928	0.462227	5.26714	2.21297	0.136855	0.99989
ENSG00000163466	ARPC2	actin related protein 2/3 complex, subunit 2, 34kDa [Source:HGNC Symbol;Acc:705]	2	q35	1	219081817	219119079	6562	-0.224111	10.486	2.2112	0.137012	0.99989
ENSG00000156642	NPTN	neuroplastin [Source:HGNC Symbol;Acc:17867]	15	q24.1	-1	73852355	73926475	4042	-0.312669	8.8052	2.20993	0.137125	0.99989
ENSG00000137942	FNBP1L	formin binding protein 1-like [Source:HGNC Symbol;Acc:20851]	1	p22.1	1	93913688	94020218	5798	0.374439	6.02609	2.2034	0.137707	0.99989
ENSG00000122257	RBBP6	retinoblastoma binding protein 6 [Source:HGNC Symbol;Acc:9889]	16	p12.1	1	24549014	24584184	9035	0.318972	5.17193	2.20322	0.137723	0.99989
ENSG00000120992	LYPLA1	lysophospholipase I [Source:HGNC Symbol;Acc:6737]	8	q11.23	-1	54958938	55014577	4683	-0.386973	6.63238	2.20283	0.137757	0.99989
ENSG00000183648	NDUFB1	NADH dehydrogenase (ubiquinone) 1 beta subcomplex, 1, 7kDa [Source:HGNC Symbol;Acc:7695]	14	q32.12	-1	92582466	92588261	2263	0.377272	5.09646	2.20003	0.138008	0.99989
ENSG00000109689	STIM2	stromal interaction molecule 2 [Source:HGNC Symbol;Acc:19205]	4	p15.2	1	26859300	27027003	6909	0.436292	4.70063	2.19706	0.138274	0.99989
ENSG00000132950	ZMYM5	zinc finger, MYM-type 5 [Source:HGNC Symbol;Acc:13029]	13	q12.11	-1	20397622	20437776	3713	0.409257	4.70749	2.19625	0.138347	0.99989
ENSG00000134884	ARGLU1	arginine and glutamate rich 1 [Source:HGNC Symbol;Acc:25482]	13	q33.3	-1	107194021	107220512	4074	0.546314	4.8358	2.19516	0.138445	0.99989
ENSG00000162819	BROX	BRO1 domain and CAAX motif containing [Source:HGNC Symbol;Acc:26512]	1	q41	1	222885895	222908538	4932	0.403973	6.46372	2.19466	0.13849	0.99989
ENSG00000131669	NINJ1	ninjurin 1 [Source:HGNC Symbol;Acc:7824]	9	q22.31	-1	95883771	95896570	2648	-0.356154	5.27704	2.19005	0.138905	0.99989
ENSG00000143164	DCAF6	DDB1 and CUL4 associated factor 6 [Source:HGNC Symbol;Acc:30002]	1	q24.2	1	167905021	168045081	6204	-0.335081	6.53471	2.18512	0.13935	0.99989
ENSG00000151789	ZNF385D	zinc finger protein 385D [Source:HGNC Symbol;Acc:26191]	3	p24.3	-1	21459915	22414812	7420	-0.403672	7.21691	2.18432	0.139422	0.99989
ENSG00000114904	NEK4	NIMA-related kinase 4 [Source:HGNC Symbol;Acc:11399]	3	p21.1	-1	52744800	52804965	4056	-0.367744	6.24993	2.17597	0.140181	0.99989
ENSG00000177370	TIMM22	translocase of inner mitochondrial membrane 22 homolog (yeast) [Source:HGNC Symbol;Acc:17317]	17	p13.3	1	900357	906911	3194	0.35331	4.6926	2.174	0.14036	0.99989
ENSG00000051825	MPHOSPH9	M-phase phosphoprotein 9 [Source:HGNC Symbol;Acc:7215]	12	q24.31	-1	123636867	123728561	10304	-0.486054	4.64476	2.1716	0.14058	0.99989
ENSG00000134444	KIAA1468	KIAA1468 [Source:HGNC Symbol;Acc:29289]	18	q21.33	1	59854491	59974355	7592	0.702836	4.08912	2.17158	0.140582	0.99989
ENSG00000175931	UBE2O	ubiquitin-conjugating enzyme E2O [Source:HGNC Symbol;Acc:29554]	17	q25.1	-1	74385532	74449288	6472	-0.442641	5.74886	2.17053	0.140677	0.99989
ENSG00000166086	JAM3	junctional adhesion molecule 3 [Source:HGNC Symbol;Acc:15532]	11	q25	1	133938820	134021896	5451	-0.41688	7.21416	2.16887	0.14083	0.99989
ENSG00000134186	PRPF38B	pre-mRNA processing factor 38B [Source:HGNC Symbol;Acc:25512]	1	p13.3	1	109234945	109244425	5817	0.550915	4.10815	2.16704	0.140997	0.99989
ENSG00000111906	HDDC2	HD domain containing 2 [Source:HGNC Symbol;Acc:21078]	6	q22.31	-1	125541108	125623282	5946	0.594676	4.17739	2.1633	0.141341	0.99989
ENSG00000133321	RARRES3	retinoic acid receptor responder (tazarotene induced) 3 [Source:HGNC Symbol;Acc:9869]	11	q12.3	1	63304281	63313934	1299	0.388414	5.16135	2.1612	0.141534	0.99989
ENSG00000083937	CHMP2B	charged multivesicular body protein 2B [Source:HGNC Symbol;Acc:24537]	3	p11.2	1	87276421	87304698	3106	-0.386809	5.04276	2.15282	0.142308	0.99989
ENSG00000247271	ZBED5-AS1	ZBED5 antisense RNA 1 [Source:HGNC Symbol;Acc:48646]	11	p15.3	1	10879806	10928349	1995	-0.454438	5.11678	2.15269	0.14232	0.99989
ENSG00000136738	STAM	signal transducing adaptor molecule (SH3 domain and ITAM motif) 1 [Source:HGNC Symbol;Acc:11357]	10	p12.33	1	17686124	17757913	3246	0.452506	4.41327	2.15266	0.142324	0.99989
ENSG00000184840	TMED9	transmembrane emp24 protein transport domain containing 9 [Source:HGNC Symbol;Acc:24878]	5	q35.3	1	177019159	177023125	2440	-0.460871	4.70624	2.15025	0.142547	0.99989
ENSG00000165704	HPRT1	hypoxanthine phosphoribosyltransferase 1 [Source:HGNC Symbol;Acc:5157]	X	q26.2	1	133594183	133654543	1624	-0.578366	4.01572	2.14769	0.142785	0.99989
ENSG00000168566	SNRNP48	small nuclear ribonucleoprotein 48kDa (U11/U12) [Source:HGNC Symbol;Acc:21368]	6	p24.3	1	7590432	7612200	5836	0.46463	5.30167	2.14699	0.14285	0.99989
ENSG00000137486	ARRB1	arrestin, beta 1 [Source:HGNC Symbol;Acc:711]	11	q13.4	-1	74975226	75062873	5976	-0.284628	7.74803	2.14631	0.142913	0.99989
ENSG00000082068	WDR70	WD repeat domain 70 [Source:HGNC Symbol;Acc:25495]	5	p13.2	1	37379314	37753537	7039	0.670825	3.93336	2.14208	0.143307	0.99989
ENSG00000127526	SLC35E1	solute carrier family 35, member E1 [Source:HGNC Symbol;Acc:20803]	19	p13.11	-1	16660642	16683193	7257	-0.390815	4.46356	2.14063	0.143443	0.99989
ENSG00000224805	LINC00853	long intergenic non-protein coding RNA 853 [Source:HGNC Symbol;Acc:43716]	1	p33	1	47644922	47646011	661	-0.42541	5.38709	2.14035	0.143469	0.99989
ENSG00000069966	GNB5	guanine nucleotide binding protein (G protein), beta 5 [Source:HGNC Symbol;Acc:4401]	15	q21.2	-1	52413117	52483566	7487	-0.358811	8.59266	2.13298	0.14416	0.99989
ENSG00000204482	LST1	leukocyte specific transcript 1 [Source:HGNC Symbol;Acc:14189]	6	p21.33	1	31553901	31556686	2281	-0.455861	5.69148	2.13284	0.144173	0.99989
ENSG00000125388	GRK4	G protein-coupled receptor kinase 4 [Source:HGNC Symbol;Acc:4543]	4	p16.3	1	2965335	3042474	4686	0.500184	4.77839	2.13244	0.144211	0.99989
ENSG00000138802	SEC24B	SEC24 family member B [Source:HGNC Symbol;Acc:10704]	4	q25	1	110354928	110462052	5219	-0.784824	4.62899	2.13076	0.144369	0.99989
ENSG00000101236	RNF24	ring finger protein 24 [Source:HGNC Symbol;Acc:13779]	20	p13	-1	3907956	3996229	7668	-0.339992	6.76064	2.12997	0.144443	0.99989
ENSG00000213672	NCKIPSD	NCK interacting protein with SH3 domain [Source:HGNC Symbol;Acc:15486]	3	p21.31	-1	48701364	48723797	3635	-0.456416	6.21571	2.12934	0.144503	0.99989
ENSG00000065559	MAP2K4	mitogen-activated protein kinase kinase 4 [Source:HGNC Symbol;Acc:6844]	17	p12	1	11924141	12047147	5714	0.430849	4.62409	2.12404	0.145004	0.99989
ENSG00000101162	TUBB1	tubulin, beta 1 class VI [Source:HGNC Symbol;Acc:16257]	20	q13.32	1	57594309	57601709	3496	-0.335398	11.3459	2.11287	0.146065	0.99989
ENSG00000163848	ZNF148	zinc finger protein 148 [Source:HGNC Symbol;Acc:12933]	3	q21.2	-1	124944405	125094198	10574	0.388872	4.64233	2.11154	0.146192	0.99989
ENSG00000105851	PIK3CG	phosphatidylinositol-4,5-bisphosphate 3-kinase, catalytic subunit gamma [Source:HGNC Symbol;Acc:8978]	7	q22.3	1	106505723	106547590	5930	-0.4425	5.59347	2.10429	0.146887	0.99989
ENSG00000118873	RAB3GAP2	RAB3 GTPase activating protein subunit 2 (non-catalytic) [Source:HGNC Symbol;Acc:17168]	1	q41	-1	220321635	220445796	10344	-0.425252	5.56683	2.10182	0.147124	0.99989
ENSG00000033627	ATP6V0A1	ATPase, H+ transporting, lysosomal V0 subunit a1 [Source:HGNC Symbol;Acc:865]	17	q21.2	1	40610862	40674629	10968	-0.46965	5.1583	2.09972	0.147326	0.99989
ENSG00000013725	CD6	CD6 molecule [Source:HGNC Symbol;Acc:1691]	11	q12.2	1	60739115	60787849	5995	0.619815	4.28831	2.09959	0.147339	0.99989
ENSG00000068383	INPP5A	inositol polyphosphate-5-phosphatase, 40kDa [Source:HGNC Symbol;Acc:6076]	10	q26.3	1	134351324	134596979	3701	-0.332183	6.88336	2.09759	0.147532	0.99989
ENSG00000154814	OXNAD1	oxidoreductase NAD-binding domain containing 1 [Source:HGNC Symbol;Acc:25128]	3	p25.1	1	16306706	16391806	6056	0.70785	3.65755	2.0907	0.148198	0.99989
ENSG00000154222	CC2D1B	coiled-coil and C2 domain containing 1B [Source:HGNC Symbol;Acc:29386]	1	p32.3	-1	52811395	52831865	7491	0.560412	3.97078	2.089	0.148363	0.99989
ENSG00000198682	PAPSS2	3'-phosphoadenosine 5'-phosphosulfate synthase 2 [Source:HGNC Symbol;Acc:8604]	10	q23.2	1	89419370	89507462	4116	-0.508734	4.98545	2.08833	0.148429	0.99989
ENSG00000177156	TALDO1	transaldolase 1 [Source:HGNC Symbol;Acc:11559]	11	p15.5	1	747329	765024	3005	-0.2761	10.1088	2.08627	0.148628	0.99989
ENSG00000101470	TNNC2	troponin C type 2 (fast) [Source:HGNC Symbol;Acc:11944]	20	q13.12	-1	44451853	44462384	876	-0.359939	6.76501	2.08329	0.148918	0.99989
ENSG00000174953	DHX36	DEAH (Asp-Glu-Ala-His) box polypeptide 36 [Source:HGNC Symbol;Acc:14410]	3	q25.2	-1	153990335	154042286	10576	0.416902	5.58284	2.07953	0.149286	0.99989
ENSG00000134308	YWHAQ	tyrosine 3-monooxygenase/tryptophan 5-monooxygenase activation protein, theta [Source:HGNC Symbol;Acc:12854]	2	p25.1	-1	9724101	9771143	2713	-0.265956	8.25541	2.07944	0.149295	0.99989
ENSG00000113810	SMC4	structural maintenance of chromosomes 4 [Source:HGNC Symbol;Acc:14013]	3	q25.33	1	160117062	160152750	8457	0.373783	6.70129	2.07746	0.149489	0.99989
ENSG00000092020	PPP2R3C	protein phosphatase 2, regulatory subunit B'', gamma [Source:HGNC Symbol;Acc:17485]	14	q13.2	-1	35554673	35591723	3863	-0.300549	6.1858	2.07676	0.149558	0.99989
ENSG00000067992	PDK3	pyruvate dehydrogenase kinase, isozyme 3 [Source:HGNC Symbol;Acc:8811]	X	p22.11	1	24483338	24557954	2695	-0.289622	6.46145	2.07423	0.149805	0.99989
ENSG00000122958	VPS26A	vacuolar protein sorting 26 homolog A (S. pombe) [Source:HGNC Symbol;Acc:12711]	10	q22.1	1	70883268	70932617	3641	0.316676	5.76021	2.07422	0.149807	0.99989
ENSG00000107854	TNKS2	tankyrase, TRF1-interacting ankyrin-related ADP-ribose polymerase 2 [Source:HGNC Symbol;Acc:15677]	10	q23.32	1	93558069	93625033	6157	0.473487	4.98687	2.07276	0.14995	0.99989
ENSG00000130741	EIF2S3	eukaryotic translation initiation factor 2, subunit 3 gamma, 52kDa [Source:HGNC Symbol;Acc:3267]	X	p22.11	1	24072833	24096088	3472	-0.439233	5.33407	2.07108	0.150115	0.99989
ENSG00000185340	GAS2L1	growth arrest-specific 2 like 1 [Source:HGNC Symbol;Acc:16955]	22	q12.2	1	29702572	29708774	4480	-0.318425	7.92237	2.0703	0.150192	0.99989
ENSG00000198258	UBL5	ubiquitin-like 5 [Source:HGNC Symbol;Acc:13736]	19	p13.2	1	9938568	9940791	1931	-0.277032	7.87424	2.0692	0.1503	0.99989
ENSG00000127947	PTPN12	protein tyrosine phosphatase, non-receptor type 12 [Source:HGNC Symbol;Acc:9645]	7	q11.23	1	77166592	77269388	5547	0.383642	9.82735	2.06541	0.150674	0.99989
ENSG00000140386	SCAPER	S-phase cyclin A-associated protein in the ER [Source:HGNC Symbol;Acc:13081]	15	q24.3	-1	76640526	77197785	11329	0.525429	5.44028	2.05665	0.151543	0.99989
ENSG00000103415	HMOX2	heme oxygenase (decycling) 2 [Source:HGNC Symbol;Acc:5014]	16	p13.3	1	4524691	4560348	3793	-0.585379	4.38371	2.0522	0.151986	0.99989
ENSG00000159692	CTBP1	C-terminal binding protein 1 [Source:HGNC Symbol;Acc:2494]	4	p16.3	-1	1205236	1243741	8361	-0.402996	5.2717	2.05068	0.152138	0.99989
ENSG00000111897	SERINC1	serine incorporator 1 [Source:HGNC Symbol;Acc:13464]	6	q22.31	-1	122764499	122792967	3137	0.491048	5.04028	2.04809	0.152398	0.99989
ENSG00000169621	APLF	aprataxin and PNKP like factor [Source:HGNC Symbol;Acc:28724]	2	p13.3	1	68694693	68858004	5371	0.488137	4.4617	2.04671	0.152535	0.99989
ENSG00000078687	TNRC6C	trinucleotide repeat containing 6C [Source:HGNC Symbol;Acc:29318]	17	q25.3	1	76000249	76104916	11058	0.412733	5.26863	2.04665	0.152541	0.99989
ENSG00000151657	KIN	KIN, antigenic determinant of recA protein homolog (mouse) [Source:HGNC Symbol;Acc:6327]	10	p14	-1	7792925	7829990	7509	0.439831	4.54587	2.04502	0.152704	0.99989
ENSG00000160551	TAOK1	TAO kinase 1 [Source:HGNC Symbol;Acc:29259]	17	q11.2	1	27717482	27878922	16980	0.396712	7.77346	2.04482	0.152725	0.99989
ENSG00000143549	TPM3	tropomyosin 3 [Source:HGNC Symbol;Acc:12012]	1	q21.3	-1	154127784	154167124	8363	-0.254594	10.3221	2.0438	0.152828	0.99989
ENSG00000138835	RGS3	regulator of G-protein signaling 3 [Source:HGNC Symbol;Acc:9999]	9	q32	1	116207011	116360018	13690	0.415745	5.42836	2.04344	0.152864	0.99989
ENSG00000197535	MYO5A	myosin VA (heavy chain 12, myoxin) [Source:HGNC Symbol;Acc:7602]	15	q21.2	-1	52599480	52821247	13007	-0.350432	5.79961	2.04284	0.152924	0.99989
ENSG00000103549	RNF40	ring finger protein 40, E3 ubiquitin protein ligase [Source:HGNC Symbol;Acc:16867]	16	p11.2	1	30773066	30787628	6523	-0.70901	3.67104	2.04276	0.152932	0.99989
ENSG00000134243	SORT1	sortilin 1 [Source:HGNC Symbol;Acc:11186]	1	p13.3	-1	109852192	109940573	8760	-0.39525	5.7933	2.04049	0.15316	0.99989
ENSG00000123219	CENPK	centromere protein K [Source:HGNC Symbol;Acc:29479]	5	q12.3	-1	64813593	64858998	4312	0.505797	5.7838	2.03534	0.15368	0.99989
ENSG00000197858	GPAA1	glycosylphosphatidylinositol anchor attachment 1 [Source:HGNC Symbol;Acc:4446]	8	q24.3	1	145137493	145141119	3269	0.376237	5.89943	2.03335	0.153881	0.99989
ENSG00000108219	TSPAN14	tetraspanin 14 [Source:HGNC Symbol;Acc:23303]	10	q23.1	1	82213922	82292879	17883	-0.40664	4.4442	2.02993	0.154228	0.99989
ENSG00000121067	SPOP	speckle-type POZ protein [Source:HGNC Symbol;Acc:11254]	17	q21.33	-1	47676246	47755596	6380	-0.255891	6.51447	2.02661	0.154565	0.99989
ENSG00000159086	PAXBP1	PAX3 and PAX7 binding protein 1 [Source:HGNC Symbol;Acc:13579]	21	q22.11	-1	34106210	34144169	7212	0.611196	4.15843	2.02585	0.154642	0.99989
ENSG00000146425	DYNLT1	dynein, light chain, Tctex-type 1 [Source:HGNC Symbol;Acc:11697]	6	q25.3	-1	159057506	159065771	2949	0.360325	4.72171	2.01897	0.155344	0.99989
ENSG00000188243	COMMD6	COMM domain containing 6 [Source:HGNC Symbol;Acc:24015]	13	q22.2	-1	76099350	76123575	2902	0.354387	6.06627	2.01357	0.155898	0.99989
ENSG00000023734	STRAP	serine/threonine kinase receptor associated protein [Source:HGNC Symbol;Acc:30796]	12	p12.3	1	16035325	16056412	2211	-0.255081	7.50027	2.01168	0.156092	0.99989
ENSG00000151090	THRB	thyroid hormone receptor, beta [Source:HGNC Symbol;Acc:11799]	3	p24.2	-1	24158651	24536773	8709	0.504862	5.30864	2.00952	0.156315	0.99989
ENSG00000134283	PPHLN1	periphilin 1 [Source:HGNC Symbol;Acc:19369]	12	q12	1	42632249	42853517	8798	0.430411	5.02308	2.0088	0.156389	0.99989
ENSG00000198707	CEP290	centrosomal protein 290kDa [Source:HGNC Symbol;Acc:29021]	12	q21.32	-1	88442793	88535993	10386	0.422712	5.70667	2.00414	0.15687	0.99989
ENSG00000065613	SLK	STE20-like kinase [Source:HGNC Symbol;Acc:11088]	10	q24.33	1	105726959	105788991	7974	0.329238	5.72186	2.00015	0.157284	0.99989
ENSG00000100711	ZFYVE21	zinc finger, FYVE domain containing 21 [Source:HGNC Symbol;Acc:20760]	14	q32.33	1	104182067	104200005	8390	-0.393518	7.1798	1.99612	0.157702	0.99989
ENSG00000174485	DENND4A	DENN/MADD domain containing 4A [Source:HGNC Symbol;Acc:24321]	15	q22.31	-1	65950384	66084631	8902	0.333769	5.93852	1.99491	0.157829	0.99989
ENSG00000134744	ZCCHC11	zinc finger, CCHC domain containing 11 [Source:HGNC Symbol;Acc:28981]	1	p32.3	-1	52873954	53019159	16199	0.385057	5.23002	1.99149	0.158185	0.99989
ENSG00000159593	NAE1	NEDD8 activating enzyme E1 subunit 1 [Source:HGNC Symbol;Acc:621]	16	q22.1	-1	66836778	66907159	4810	-0.263689	7.63834	1.99006	0.158335	0.99989
ENSG00000102974	CTCF	CCCTC-binding factor (zinc finger protein) [Source:HGNC Symbol;Acc:13723]	16	q22.1	1	67596310	67673086	4301	-0.290959	5.71567	1.9895	0.158394	0.99989
ENSG00000096060	FKBP5	FK506 binding protein 5 [Source:HGNC Symbol;Acc:3721]	6	p21.31	-1	35541362	35696360	10628	-0.559162	4.74402	1.98449	0.158918	0.99989
ENSG00000133275	CSNK1G2	casein kinase 1, gamma 2 [Source:HGNC Symbol;Acc:2455]	19	p13.3	1	1941188	1981337	4229	-0.346687	5.23804	1.9796	0.159433	0.99989
ENSG00000127838	PNKD	paroxysmal nonkinesigenic dyskinesia [Source:HGNC Symbol;Acc:9153]	2	q35	1	219135115	219211516	5184	-0.334518	6.38916	1.97957	0.159435	0.99989
ENSG00000134759	ELP2	elongator acetyltransferase complex subunit 2 [Source:HGNC Symbol;Acc:18248]	18	q12.2	1	33709407	33757909	8458	0.537976	4.47712	1.9778	0.159623	0.99989
ENSG00000064726	BTBD1	BTB (POZ) domain containing 1 [Source:HGNC Symbol;Acc:1120]	15	q25.2	-1	83685174	83736106	4169	-0.321071	6.07707	1.97594	0.159819	0.99989
ENSG00000138592	USP8	ubiquitin specific peptidase 8 [Source:HGNC Symbol;Acc:12631]	15	q21.2	1	50716577	50793280	7303	0.347834	5.68727	1.97287	0.160143	0.99989
ENSG00000125351	UPF3B	UPF3 regulator of nonsense transcripts homolog B (yeast) [Source:HGNC Symbol;Acc:20439]	X	q24	-1	118967985	118986961	2531	0.453131	4.50081	1.96788	0.160674	0.99989
ENSG00000107863	ARHGAP21	Rho GTPase activating protein 21 [Source:HGNC Symbol;Acc:23725]	10	p12.1	-1	24872538	25012597	10739	0.376368	8.27065	1.96751	0.160712	0.99989
ENSG00000018699	TTC27	tetratricopeptide repeat domain 27 [Source:HGNC Symbol;Acc:25986]	2	p22.3	1	32853099	33046118	3185	0.484043	4.17307	1.96711	0.160755	0.99989
ENSG00000132824	SERINC3	serine incorporator 3 [Source:HGNC Symbol;Acc:11699]	20	q13.12	-1	43124862	43150750	4683	-0.262122	8.43393	1.96534	0.160944	0.99989
ENSG00000211829	TRDC	T cell receptor delta constant [Source:HGNC Symbol;Acc:12253]	14	q11.2	1	22931924	22934779	720	-0.517971	4.92187	1.96509	0.16097	0.99989
ENSG00000122970	IFT81	intraflagellar transport 81 homolog (Chlamydomonas) [Source:HGNC Symbol;Acc:14313]	12	q24.11	1	110562140	110656602	7005	0.491676	5.13729	1.96483	0.160998	0.99989
ENSG00000127824	TUBA4A	tubulin, alpha 4a [Source:HGNC Symbol;Acc:12407]	2	q35	-1	220114433	220142892	4079	-0.302591	10.0999	1.96383	0.161104	0.99989
ENSG00000138376	BARD1	BRCA1 associated RING domain 1 [Source:HGNC Symbol;Acc:952]	2	q35	-1	215590370	215674428	6062	0.445764	6.3338	1.96212	0.161286	0.99989
ENSG00000102316	MAGED2	melanoma antigen family D, 2 [Source:HGNC Symbol;Acc:16353]	X	p11.21	1	54834032	54842445	2914	-0.304845	9.09187	1.96141	0.161363	0.99989
ENSG00000150045	KLRF1	killer cell lectin-like receptor subfamily F, member 1 [Source:HGNC Symbol;Acc:13342]	12	p13.31	1	9980077	9997606	1263	-0.584921	4.46418	1.95972	0.161544	0.99989
ENSG00000135316	SYNCRIP	synaptotagmin binding, cytoplasmic RNA interacting protein [Source:HGNC Symbol;Acc:16918]	6	q14.3	-1	86318053	86353510	7655	0.341128	5.57279	1.95896	0.161624	0.99989
ENSG00000205593	DENND6B	DENN/MADD domain containing 6B [Source:HGNC Symbol;Acc:32690]	22	q13.33	-1	50747459	50765489	5935	-0.446803	5.00941	1.9556	0.161984	0.99989
ENSG00000109272	PF4V1	platelet factor 4 variant 1 [Source:HGNC Symbol;Acc:8862]	4	q13.3	1	74718906	74719872	522	-0.49482	9.9692	1.94737	0.162871	0.99989
ENSG00000091542	ALKBH5	alkB, alkylation repair homolog 5 (E. coli) [Source:HGNC Symbol;Acc:25996]	17	p11.2	1	18086392	18113268	3190	-0.424512	4.26759	1.94717	0.162892	0.99989
ENSG00000102580	DNAJC3	DnaJ (Hsp40) homolog, subfamily C, member 3 [Source:HGNC Symbol;Acc:9439]	13	q32.1	1	96329393	96447243	5591	0.397796	5.11772	1.94651	0.162963	0.99989
ENSG00000159720	ATP6V0D1	ATPase, H+ transporting, lysosomal 38kDa, V0 subunit d1 [Source:HGNC Symbol;Acc:13724]	16	q22.1	-1	67471917	67515140	8212	-0.264314	6.7403	1.94239	0.16341	0.99989
ENSG00000198919	DZIP3	DAZ interacting zinc finger protein 3 [Source:HGNC Symbol;Acc:30938]	3	q13.13	1	108308529	108413693	6972	0.750984	4.06584	1.94059	0.163604	0.99989
ENSG00000128578	STRIP2	striatin interacting protein 2 [Source:HGNC Symbol;Acc:22209]	7	q32.1	1	129074274	129128240	5876	-0.470864	4.05207	1.93958	0.163714	0.99989
ENSG00000253819	LINC01151	long intergenic non-protein coding RNA 1151 [Source:HGNC Symbol;Acc:49471]	8	q24.13	-1	123682624	123706345	571	-0.462358	5.29028	1.93748	0.163942	0.99989
ENSG00000162174	ASRGL1	asparaginase like 1 [Source:HGNC Symbol;Acc:16448]	11	q12.3	1	62104920	62160882	4584	-0.48582	4.09033	1.93689	0.164007	0.99989
ENSG00000068366	ACSL4	acyl-CoA synthetase long-chain family member 4 [Source:HGNC Symbol;Acc:3571]	X	q23	-1	108867473	108976632	6415	-0.288412	6.08871	1.93669	0.164028	0.99989
ENSG00000144028	SNRNP200	small nuclear ribonucleoprotein 200kDa (U5) [Source:HGNC Symbol;Acc:30859]	2	q11.2	-1	96940074	96971297	10970	0.567326	5.78316	1.93543	0.164165	0.99989
ENSG00000061936	SFSWAP	splicing factor, suppressor of white-apricot homolog (Drosophila) [Source:HGNC Symbol;Acc:10790]	12	q24.33	1	132195626	132284282	10157	0.54651	4.38329	1.93419	0.164301	0.99989
ENSG00000001461	NIPAL3	NIPA-like domain containing 3 [Source:HGNC Symbol;Acc:25233]	1	p36.11	1	24742284	24799466	9404	-0.52517	4.52662	1.93194	0.164546	0.99989
ENSG00000140632	GLYR1	glyoxylate reductase 1 homolog (Arabidopsis) [Source:HGNC Symbol;Acc:24434]	16	p13.3	-1	4853204	4897343	5470	-0.41286	5.2599	1.93129	0.164617	0.99989
ENSG00000010278	CD9	CD9 molecule [Source:HGNC Symbol;Acc:1709]	12	p13.31	1	6308881	6347425	3218	-0.292256	10.0405	1.9252	0.165285	0.99989
ENSG00000246889			11	q13.3	-1	70218352	70244594	3078	-0.402642	4.82307	1.92008	0.165848	0.99989
ENSG00000121964	GTDC1	glycosyltransferase-like domain containing 1 [Source:HGNC Symbol;Acc:20887]	2	q22.3	-1	144695635	145090135	14162	-0.309203	6.84448	1.91802	0.166076	0.99989
ENSG00000149925	ALDOA	aldolase A, fructose-bisphosphate [Source:HGNC Symbol;Acc:414]	16	p11.2	1	30064411	30081778	6153	-0.276742	11.4013	1.91735	0.166149	0.99989
ENSG00000102595	UGGT2	UDP-glucose glycoprotein glucosyltransferase 2 [Source:HGNC Symbol;Acc:15664]	13	q32.1	-1	96453834	96705736	8091	0.598737	5.62336	1.91256	0.16668	0.99989
ENSG00000198876	DCAF12	DDB1 and CUL4 associated factor 12 [Source:HGNC Symbol;Acc:19911]	9	p13.3	-1	34086385	34127397	4390	-0.411373	5.42129	1.90379	0.167654	0.99989
ENSG00000136936	XPA	xeroderma pigmentosum, complementation group A [Source:HGNC Symbol;Acc:12814]	9	q22.33	-1	100437191	100459639	1833	0.573515	3.87133	1.90366	0.16767	0.99989
ENSG00000114520	SNX4	sorting nexin 4 [Source:HGNC Symbol;Acc:11175]	3	q21.2	-1	125165495	125239041	2702	0.489687	4.9393	1.9025	0.167799	0.99989
ENSG00000198791	CNOT7	CCR4-NOT transcription complex, subunit 7 [Source:HGNC Symbol;Acc:14101]	8	p22	-1	17086737	17104387	6679	-0.363687	4.85022	1.90112	0.167953	0.99989
ENSG00000078142	PIK3C3	phosphatidylinositol 3-kinase, catalytic subunit type 3 [Source:HGNC Symbol;Acc:8974]	18	q12.3	1	39535171	39667794	15176	0.374598	5.92583	1.90097	0.16797	0.99989
ENSG00000114316	USP4	ubiquitin specific peptidase 4 (proto-oncogene) [Source:HGNC Symbol;Acc:12627]	3	p21.31	-1	49315264	49378145	6659	-0.316763	6.73858	1.89907	0.168182	0.99989
ENSG00000114857	NKTR	natural killer-tumor recognition sequence [Source:HGNC Symbol;Acc:7833]	3	p22.1	1	42642106	42690227	17350	0.394074	5.92045	1.8979	0.168313	0.99989
ENSG00000175581	MRPL48	mitochondrial ribosomal protein L48 [Source:HGNC Symbol;Acc:16653]	11	q13.4	1	73498361	73576178	4386	-0.612606	3.9621	1.89681	0.168436	0.99989
ENSG00000156976	EIF4A2	eukaryotic translation initiation factor 4A2 [Source:HGNC Symbol;Acc:3284]	3	q27.3	1	186500994	186507689	6133	-0.255378	6.67408	1.89614	0.168512	0.99989
ENSG00000139746	RBM26	RNA binding motif protein 26 [Source:HGNC Symbol;Acc:20327]	13	q31.1	-1	79885962	79980612	9018	0.417324	4.66793	1.89428	0.16872	0.99989
ENSG00000236279	CLEC2L	C-type lectin domain family 2, member L [Source:HGNC Symbol;Acc:21969]	7	q34	1	139208602	139229730	2527	-0.503296	5.29919	1.8938	0.168774	0.99989
ENSG00000055044	NOP58	NOP58 ribonucleoprotein [Source:HGNC Symbol;Acc:29926]	2	q33.1	1	203130439	203168389	3299	0.352882	5.97306	1.89132	0.169053	0.99989
ENSG00000160584	SIK3	SIK family kinase 3 [Source:HGNC Symbol;Acc:29165]	11	q23.3	-1	116714118	116969153	10920	-0.501663	4.79563	1.88598	0.169656	0.99989
ENSG00000103740	ACSBG1	acyl-CoA synthetase bubblegum family member 1 [Source:HGNC Symbol;Acc:29567]	15	q25.1	-1	78459810	78538030	8230	-0.377718	4.5531	1.88468	0.169803	0.99989
ENSG00000100994	PYGB	phosphorylase, glycogen; brain [Source:HGNC Symbol;Acc:9723]	20	p11.21	1	25228705	25278650	4474	-0.373605	8.79839	1.88415	0.169864	0.99989
ENSG00000122218	COPA	coatomer protein complex, subunit alpha [Source:HGNC Symbol;Acc:2230]	1	q23.2	-1	160259063	160313190	6232	-0.29563	8.41444	1.87756	0.170612	0.99989
ENSG00000159339	PADI4	peptidyl arginine deiminase, type IV [Source:HGNC Symbol;Acc:18368]	1	p36.13	1	17634690	17690499	2971	-0.540931	8.70567	1.87342	0.171084	0.99989
ENSG00000101882	NKAP	NFKB activating protein [Source:HGNC Symbol;Acc:29873]	X	q24	-1	119059014	119077735	3515	0.472519	4.01221	1.86994	0.171481	0.99989
ENSG00000126561	STAT5A	signal transducer and activator of transcription 5A [Source:HGNC Symbol;Acc:11366]	17	q21.2	1	40439565	40463961	5756	-0.428223	5.24455	1.86665	0.171859	0.99989
ENSG00000075415	SLC25A3	solute carrier family 25 (mitochondrial carrier; phosphate carrier), member 3 [Source:HGNC Symbol;Acc:10989]	12	q23.1	1	98987369	98995946	4685	-0.291598	6.52096	1.86659	0.171866	0.99989
ENSG00000154305	MIA3	melanoma inhibitory activity family, member 3 [Source:HGNC Symbol;Acc:24008]	1	q41	1	222791428	222841354	10188	0.646611	4.53647	1.86604	0.171929	0.99989
ENSG00000124767	GLO1	glyoxalase I [Source:HGNC Symbol;Acc:4323]	6	p21.2	-1	38643701	38670917	2352	-0.452973	3.97688	1.865	0.172049	0.99989
ENSG00000111596	CNOT2	CCR4-NOT transcription complex, subunit 2 [Source:HGNC Symbol;Acc:7878]	12	q15	1	70636774	70748773	13186	-0.32271	5.97244	1.86458	0.172097	0.99989
ENSG00000173674	EIF1AX	eukaryotic translation initiation factor 1A, X-linked [Source:HGNC Symbol;Acc:3250]	X	p22.12	-1	20142636	20159962	4427	-0.312402	5.55519	1.864	0.172164	0.99989
ENSG00000129235	TXNDC17	thioredoxin domain containing 17 [Source:HGNC Symbol;Acc:28218]	17	p13.1	1	6544078	6547861	3784	0.41745	4.21998	1.85747	0.172917	0.99989
ENSG00000126091	ST3GAL3	ST3 beta-galactoside alpha-2,3-sialyltransferase 3 [Source:HGNC Symbol;Acc:10866]	1	p34.1	1	44171495	44396831	4425	-0.378934	7.61158	1.85311	0.173422	0.99989
ENSG00000069493	CLEC2D	C-type lectin domain family 2, member D [Source:HGNC Symbol;Acc:14351]	12	p13.31	1	9817565	9848413	3219	0.594576	4.51215	1.8529	0.173447	0.99989
ENSG00000038219	BOD1L1	biorientation of chromosomes in cell division 1-like 1 [Source:HGNC Symbol;Acc:31792]	4	p15.33	-1	13570362	13629347	15860	0.485158	6.23095	1.84771	0.17405	0.99989
ENSG00000005483	KMT2E	lysine (K)-specific methyltransferase 2E [Source:HGNC Symbol;Acc:18541]	7	q22.3	1	104654626	104754808	9227	0.232301	8.3886	1.84341	0.174552	0.99989
ENSG00000075539	FRYL	FRY-like [Source:HGNC Symbol;Acc:29127]	4	p11	-1	48499378	48782339	18170	0.442203	4.68087	1.84136	0.174792	0.99989
ENSG00000140264	SERF2	small EDRK-rich factor 2 [Source:HGNC Symbol;Acc:10757]	15	q15.3	1	44069285	44094787	7347	0.409778	8.25652	1.83951	0.175009	0.99989
ENSG00000161547	SRSF2	serine/arginine-rich splicing factor 2 [Source:HGNC Symbol;Acc:10783]	17	q25.1	-1	74730197	74733456	3017	-0.311323	5.19219	1.8368	0.175327	0.99989
ENSG00000117862	TXNDC12	thioredoxin domain containing 12 (endoplasmic reticulum) [Source:HGNC Symbol;Acc:24626]	1	p32.3	-1	52485803	52521843	3630	0.417898	4.62487	1.83446	0.175602	0.99989
ENSG00000075413	MARK3	MAP/microtubule affinity-regulating kinase 3 [Source:HGNC Symbol;Acc:6897]	14	q32.32	1	103851729	103970168	8891	0.244212	6.93408	1.83423	0.175629	0.99989
ENSG00000065675	PRKCQ	protein kinase C, theta [Source:HGNC Symbol;Acc:9410]	10	p14	-1	6469105	6622263	3285	-0.33667	6.52653	1.83303	0.17577	0.99989
ENSG00000116717	GADD45A	growth arrest and DNA-damage-inducible, alpha [Source:HGNC Symbol;Acc:4095]	1	p31.3	1	68150744	68154021	2069	0.3618	5.76053	1.82629	0.176567	0.99989
ENSG00000092847	AGO1	argonaute RISC catalytic component 1 [Source:HGNC Symbol;Acc:3262]	1	p34.3	1	36335409	36395211	12886	-0.527083	4.65303	1.82387	0.176853	0.99989
ENSG00000100764	PSMC1	proteasome (prosome, macropain) 26S subunit, ATPase, 1 [Source:HGNC Symbol;Acc:9547]	14	q32.11	1	90722839	90738968	3356	0.351652	4.80353	1.81423	0.178002	0.99989
ENSG00000104312	RIPK2	receptor-interacting serine-threonine kinase 2 [Source:HGNC Symbol;Acc:10020]	8	q21.3	1	90769975	90803291	3117	-0.559549	4.30818	1.8098	0.178532	0.99989
ENSG00000100393	EP300	E1A binding protein p300 [Source:HGNC Symbol;Acc:3373]	22	q13.2	1	41487790	41576081	9585	0.292208	5.72259	1.80953	0.178564	0.99989
ENSG00000117305	HMGCL	3-hydroxymethyl-3-methylglutaryl-CoA lyase [Source:HGNC Symbol;Acc:5005]	1	p36.11	-1	24128375	24165110	5658	0.346408	4.72961	1.8092	0.178604	0.99989
ENSG00000124486	USP9X	ubiquitin specific peptidase 9, X-linked [Source:HGNC Symbol;Acc:12632]	X	p11.4	1	40944888	41095832	13962	-0.348001	7.3672	1.80665	0.178911	0.99989
ENSG00000198478	SH3BGRL2	SH3 domain binding glutamic acid-rich protein like 2 [Source:HGNC Symbol;Acc:15567]	6	q14.1	1	80341000	80413372	4649	-0.341243	9.33509	1.80426	0.179198	0.99989
ENSG00000129347	KRI1	KRI1 homolog (S. cerevisiae) [Source:HGNC Symbol;Acc:25769]	19	p13.2	-1	10663761	10676713	4260	0.596135	4.18244	1.79959	0.179762	0.99989
ENSG00000167004	PDIA3	protein disulfide isomerase family A, member 3 [Source:HGNC Symbol;Acc:4606]	15	q15.3	1	44038590	44065477	4240	-0.26485	8.48496	1.79953	0.17977	0.99989
ENSG00000172732	MUS81	MUS81 structure-specific endonuclease subunit [Source:HGNC Symbol;Acc:29814]	11	q13.1	1	65624597	65635124	5476	0.624828	3.55495	1.79723	0.180048	0.99989
ENSG00000122359	ANXA11	annexin A11 [Source:HGNC Symbol;Acc:535]	10	q22.3	-1	81910645	81965328	8770	-0.209401	8.85615	1.79407	0.180431	0.99989
ENSG00000138279	ANXA7	annexin A7 [Source:HGNC Symbol;Acc:545]	10	q22.2	-1	75134859	75173834	2862	-0.228459	8.22723	1.79286	0.180578	0.99989
ENSG00000158019	BRE	brain and reproductive organ-expressed (TNFRSF1A modulator) [Source:HGNC Symbol;Acc:1106]	2	p23.2	1	28112808	28561768	3392	-0.27294	6.04297	1.78818	0.181148	0.99989
ENSG00000100201	DDX17	DEAD (Asp-Glu-Ala-Asp) box helicase 17 [Source:HGNC Symbol;Acc:2740]	22	q13.1	-1	38879445	38903665	9998	0.420532	5.28826	1.78733	0.181252	0.99989
ENSG00000117523	PRRC2C	proline-rich coiled-coil 2C [Source:HGNC Symbol;Acc:24903]	1	q24.3	1	171454651	171562650	14192	0.243215	8.30497	1.7855	0.181476	0.99989
ENSG00000198805	PNP	purine nucleoside phosphorylase [Source:HGNC Symbol;Acc:7892]	14	q11.2	1	20937113	20945253	4139	0.38179	5.23322	1.78351	0.181718	0.99989
ENSG00000159131	GART	phosphoribosylglycinamide formyltransferase, phosphoribosylglycinamide synthetase, phosphoribosylaminoimidazole synthetase [Source:HGNC Symbol;Acc:4163]	21	q22.11	-1	34876238	34915797	7804	0.683776	4.1795	1.78311	0.181768	0.99989
ENSG00000005175	RPAP3	RNA polymerase II associated protein 3 [Source:HGNC Symbol;Acc:26151]	12	q13.11	-1	48057070	48099844	3343	0.316704	6.23154	1.782	0.181903	0.99989
ENSG00000144357	UBR3	ubiquitin protein ligase E3 component n-recognin 3 (putative) [Source:HGNC Symbol;Acc:30467]	2	q31.1	1	170683968	170940641	10160	0.577263	4.06386	1.78178	0.181931	0.99989
ENSG00000183624	HMCES	5-hydroxymethylcytosine (hmC) binding, ES cell-specific [Source:HGNC Symbol;Acc:24446]	3	q21.3	1	128997671	129025029	2783	0.503007	3.60352	1.77904	0.182267	0.99989
ENSG00000197102	DYNC1H1	dynein, cytoplasmic 1, heavy chain 1 [Source:HGNC Symbol;Acc:2961]	14	q32.31	1	102430865	102517129	15826	0.414705	5.58162	1.77579	0.182667	0.99989
ENSG00000105202	FBL	fibrillarin [Source:HGNC Symbol;Acc:3599]	19	q13.2	-1	40325098	40337054	2173	0.433137	5.30039	1.77084	0.183279	0.99989
ENSG00000164024	METAP1	methionyl aminopeptidase 1 [Source:HGNC Symbol;Acc:15789]	4	q23	1	99916771	99983964	4117	-0.457412	4.15599	1.76993	0.183391	0.99989
ENSG00000115966	ATF2	activating transcription factor 2 [Source:HGNC Symbol;Acc:784]	2	q31.1	-1	175936978	176033110	5751	0.307254	5.25488	1.76715	0.183735	0.99989
ENSG00000090273	NUDC	nudC nuclear distribution protein [Source:HGNC Symbol;Acc:8045]	1	p36.11	1	27226729	27273353	2856	0.307939	5.83387	1.76657	0.183807	0.99989
ENSG00000132819	RBM38	RNA binding motif protein 38 [Source:HGNC Symbol;Acc:15818]	20	q13.31	1	55966463	55984389	2686	-0.32069	4.79267	1.76435	0.184082	0.99989
ENSG00000113369	ARRDC3	arrestin domain containing 3 [Source:HGNC Symbol;Acc:29263]	5	q14.3	-1	90664541	90679176	4934	0.396396	4.73842	1.76405	0.18412	0.99989
ENSG00000148730	EIF4EBP2	eukaryotic translation initiation factor 4E binding protein 2 [Source:HGNC Symbol;Acc:3289]	10	q22.1	1	72164135	72188374	7257	-0.317058	4.26325	1.7635	0.184189	0.99989
ENSG00000223551	TMSB4XP4	thymosin beta 4, X-linked pseudogene 4 [Source:HGNC Symbol;Acc:11886]	9	q34.11	1	131104432	131105049	618	0.506795	5.9698	1.76021	0.184598	0.99989
ENSG00000096968	JAK2	Janus kinase 2 [Source:HGNC Symbol;Acc:6192]	9	p24.1	1	4985033	5128183	6068	-0.271524	7.26509	1.75826	0.184841	0.99989
ENSG00000169398	PTK2	protein tyrosine kinase 2 [Source:HGNC Symbol;Acc:9611]	8	q24.3	-1	141667999	142012315	13747	-0.320116	8.47059	1.75565	0.185168	0.99989
ENSG00000144635	DYNC1LI1	dynein, cytoplasmic 1, light intermediate chain 1 [Source:HGNC Symbol;Acc:18745]	3	p22.3	-1	32567463	32612366	6132	-0.334992	5.46142	1.74897	0.186007	0.99989
ENSG00000078902	TOLLIP	toll interacting protein [Source:HGNC Symbol;Acc:16476]	11	p15.5	-1	1295601	1330884	5983	-0.258416	6.58188	1.74708	0.186245	0.99989
ENSG00000213585	VDAC1	voltage-dependent anion channel 1 [Source:HGNC Symbol;Acc:12669]	5	q31.1	-1	133307606	133340824	3164	-0.389256	4.67755	1.74547	0.186447	0.99989
ENSG00000075785	RAB7A	RAB7A, member RAS oncogene family [Source:HGNC Symbol;Acc:9788]	3	q21.3	1	128444965	128533639	2717	-0.201528	7.4155	1.74302	0.186756	0.99989
ENSG00000179632	MAF1	MAF1 homolog (S. cerevisiae) [Source:HGNC Symbol;Acc:24966]	8	q24.3	1	145159402	145162514	2377	-0.238693	7.99402	1.74258	0.186813	0.99989
ENSG00000134668	SPOCD1	SPOC domain containing 1 [Source:HGNC Symbol;Acc:26338]	1	p35.2	-1	32256023	32281652	7085	-0.341003	7.65279	1.73853	0.187325	0.99989
ENSG00000187118	CMC1	C-x(9)-C motif containing 1 [Source:HGNC Symbol;Acc:28783]	3	p24.1	1	28283075	28366633	10536	-0.355668	4.73713	1.73745	0.187463	0.99989
ENSG00000146457	WTAP	Wilms tumor 1 associated protein [Source:HGNC Symbol;Acc:16846]	6	q25.3	1	160146617	160177351	5794	-0.276985	4.6998	1.73647	0.187586	0.99989
ENSG00000009844	VTA1	vesicle (multivesicular body) trafficking 1 [Source:HGNC Symbol;Acc:20954]	6	q24.1	1	142468367	142545826	7194	0.379505	4.81686	1.73629	0.18761	0.99989
ENSG00000105835	NAMPT	nicotinamide phosphoribosyltransferase [Source:HGNC Symbol;Acc:30092]	7	q22.3	-1	105888731	105926772	9049	-0.500885	5.49964	1.73588	0.187662	0.99989
ENSG00000163932	PRKCD	protein kinase C, delta [Source:HGNC Symbol;Acc:9399]	3	p21.1	1	53190025	53226733	3396	-0.243457	9.31067	1.73336	0.187983	0.99989
ENSG00000160932	LY6E	lymphocyte antigen 6 complex, locus E [Source:HGNC Symbol;Acc:6727]	8	q24.3	1	144099399	144105249	2640	0.48626	4.15604	1.73328	0.187993	0.99989
ENSG00000184500	PROS1	protein S (alpha) [Source:HGNC Symbol;Acc:9456]	3	q11.1	-1	93591881	93692910	4425	-0.384948	9.06045	1.73174	0.188189	0.99989
ENSG00000103876	FAH	fumarylacetoacetate hydrolase (fumarylacetoacetase) [Source:HGNC Symbol;Acc:3579]	15	q25.1	1	80444832	80479288	7063	-0.315397	7.92067	1.73153	0.188216	0.99989
ENSG00000197563	PIGN	phosphatidylinositol glycan anchor biosynthesis, class N [Source:HGNC Symbol;Acc:8967]	18	q21.33	-1	59710800	59854351	6796	0.47529	4.3471	1.72988	0.188427	0.99989
ENSG00000138293	NCOA4	nuclear receptor coactivator 4 [Source:HGNC Symbol;Acc:7671]	10	q11.23	1	51565108	51590734	4196	-0.326053	10.8677	1.72464	0.189097	0.99989
ENSG00000071051	NCK2	NCK adaptor protein 2 [Source:HGNC Symbol;Acc:7665]	2	q12.2	1	106361354	106510730	2990	-0.281082	7.61047	1.72281	0.189332	0.99989
ENSG00000053770	AP5M1	adaptor-related protein complex 5, mu 1 subunit [Source:HGNC Symbol;Acc:20192]	14	q22.3	1	57735627	57756797	4371	-0.371694	4.42574	1.72081	0.189589	0.99989
ENSG00000125827	TMX4	thioredoxin-related transmembrane protein 4 [Source:HGNC Symbol;Acc:25237]	20	p12.3	-1	7957995	8000476	6579	-0.304809	5.41711	1.72013	0.189676	0.99989
ENSG00000139132	FGD4	FYVE, RhoGEF and PH domain containing 4 [Source:HGNC Symbol;Acc:19125]	12	p11.21	1	32552463	32798984	10629	0.445949	4.5787	1.7166	0.190131	0.99989
ENSG00000061676	NCKAP1	NCK-associated protein 1 [Source:HGNC Symbol;Acc:7666]	2	q32.1	-1	183773843	183903586	22520	0.368617	7.55103	1.71652	0.190142	0.99989
ENSG00000130640	TUBGCP2	tubulin, gamma complex associated protein 2 [Source:HGNC Symbol;Acc:18599]	10	q26.3	-1	135093135	135125841	6680	0.543205	4.66983	1.71454	0.190397	0.99989
ENSG00000075945	KIFAP3	kinesin-associated protein 3 [Source:HGNC Symbol;Acc:17060]	1	q24.2	-1	169890467	170054349	5014	0.284744	7.8008	1.70767	0.191288	0.99989
ENSG00000129355	CDKN2D	cyclin-dependent kinase inhibitor 2D (p19, inhibits CDK4) [Source:HGNC Symbol;Acc:1790]	19	p13.2	-1	10677138	10679735	1503	-0.29739	7.82887	1.70627	0.19147	0.99989
ENSG00000104907	TRMT1	tRNA methyltransferase 1 homolog (S. cerevisiae) [Source:HGNC Symbol;Acc:25980]	19	p13.2	-1	13215716	13228381	3364	0.319316	4.86763	1.70534	0.191591	0.99989
ENSG00000165671	NSD1	nuclear receptor binding SET domain protein 1 [Source:HGNC Symbol;Acc:14234]	5	q35.2	1	176560026	176727216	15242	0.280054	5.32764	1.70473	0.191671	0.99989
ENSG00000185236	RAB11B	RAB11B, member RAS oncogene family [Source:HGNC Symbol;Acc:9761]	19	p13.2	1	8454865	8469318	2470	-0.329684	6.60569	1.70342	0.191842	0.99989
ENSG00000147394	ZNF185	zinc finger protein 185 (LIM domain) [Source:HGNC Symbol;Acc:12976]	X	q28	1	152082986	152142024	4795	-0.30553	10.2388	1.703	0.191897	0.99989
ENSG00000131504	DIAPH1	diaphanous-related formin 1 [Source:HGNC Symbol;Acc:2876]	5	q31.3	-1	140894583	140998622	7089	-0.370488	8.5972	1.70265	0.191941	0.99989
ENSG00000065882	TBC1D1	TBC1 (tre-2/USP6, BUB2, cdc16) domain family, member 1 [Source:HGNC Symbol;Acc:11578]	4	p14	1	37892708	38140796	9027	-0.282372	5.71976	1.70193	0.192035	0.99989
ENSG00000109536	FRG1	FSHD region gene 1 [Source:HGNC Symbol;Acc:3954]	4	q35.2	1	190861943	190884359	1707	0.377863	5.23837	1.70166	0.192071	0.99989
ENSG00000184076	UQCR10	ubiquinol-cytochrome c reductase, complex III subunit X [Source:HGNC Symbol;Acc:30863]	22	q12.2	1	30163358	30166402	975	0.278682	5.73308	1.70058	0.192212	0.99989
ENSG00000137804	NUSAP1	nucleolar and spindle associated protein 1 [Source:HGNC Symbol;Acc:18538]	15	q15.1	1	41624892	41673248	2875	0.506914	4.55708	1.6976	0.192603	0.99989
ENSG00000131171	SH3BGRL	SH3 domain binding glutamic acid-rich protein like [Source:HGNC Symbol;Acc:10823]	X	q21.1	1	80457442	80554046	2304	-0.294118	10.5303	1.69625	0.192779	0.99989
ENSG00000160218	TRAPPC10	trafficking protein particle complex 10 [Source:HGNC Symbol;Acc:11868]	21	q22.3	1	45432200	45526433	11941	-0.324797	5.4353	1.69577	0.192842	0.99989
ENSG00000162521	RBBP4	retinoblastoma binding protein 4 [Source:HGNC Symbol;Acc:9887]	1	p35.1	1	33116743	33151812	9470	-0.22137	7.57124	1.69542	0.192888	0.99989
ENSG00000163930	BAP1	BRCA1 associated protein-1 (ubiquitin carboxy-terminal hydrolase) [Source:HGNC Symbol;Acc:950]	3	p21.1	-1	52435029	52444366	5055	-0.417357	4.62486	1.69169	0.193379	0.99989
ENSG00000171314	PGAM1	phosphoglycerate mutase 1 (brain) [Source:HGNC Symbol;Acc:8888]	10	q24.1	1	99185917	99193198	2568	-0.280247	4.90189	1.68908	0.193722	0.99989
ENSG00000112078	KCTD20	potassium channel tetramerization domain containing 20 [Source:HGNC Symbol;Acc:21052]	6	p21.31	1	36410544	36458920	6239	-0.325848	7.95972	1.68781	0.193891	0.99989
ENSG00000008282	SYPL1	synaptophysin-like 1 [Source:HGNC Symbol;Acc:11507]	7	q22.3	-1	105730949	105753022	2794	0.352945	4.52388	1.68759	0.19392	0.99989
ENSG00000087088	BAX	BCL2-associated X protein [Source:HGNC Symbol;Acc:959]	19	q13.33	1	49458072	49465055	2587	0.370184	4.89278	1.686	0.194128	0.99989
ENSG00000096401	CDC5L	cell division cycle 5-like [Source:HGNC Symbol;Acc:1743]	6	p21.1	1	44355262	44418163	6423	0.314635	5.42764	1.67751	0.195256	0.99989
ENSG00000113384	GOLPH3	golgi phosphoprotein 3 (coat-protein) [Source:HGNC Symbol;Acc:15452]	5	p13.3	-1	32124810	32174456	2785	-0.330546	4.47257	1.67531	0.195549	0.99989
ENSG00000156482	RPL30	ribosomal protein L30 [Source:HGNC Symbol;Acc:10333]	8	q22.2	-1	99037079	99058697	4027	0.432707	5.62567	1.67491	0.195602	0.99989
ENSG00000146070	PLA2G7	phospholipase A2, group VII (platelet-activating factor acetylhydrolase, plasma) [Source:HGNC Symbol;Acc:9040]	6	p12.3	-1	46671938	46703430	2965	-0.671641	3.62224	1.67415	0.195704	0.99989
ENSG00000067836	ROGDI	rogdi homolog (Drosophila) [Source:HGNC Symbol;Acc:29478]	16	p13.3	-1	4846969	4852951	3683	-0.401416	4.7257	1.67237	0.195941	0.99989
ENSG00000198026	ZNF335	zinc finger protein 335 [Source:HGNC Symbol;Acc:15807]	20	q13.12	-1	44577292	44600833	7543	0.703996	3.62598	1.67154	0.196052	0.99989
ENSG00000085365	SCAMP1	secretory carrier membrane protein 1 [Source:HGNC Symbol;Acc:10563]	5	q14.1	1	77656339	77776562	6842	0.356974	4.93821	1.66998	0.196261	0.99989
ENSG00000196182	STK40	serine/threonine kinase 40 [Source:HGNC Symbol;Acc:21373]	1	p34.3	-1	36805225	36851497	5590	-0.314811	8.09342	1.66373	0.197101	0.99989
ENSG00000163938	GNL3	guanine nucleotide binding protein-like 3 (nucleolar) [Source:HGNC Symbol;Acc:29931]	3	p21.1	1	52715172	52728508	3318	0.363216	5.22634	1.65721	0.197981	0.99989
ENSG00000144848	ATG3	autophagy related 3 [Source:HGNC Symbol;Acc:20962]	3	q13.2	-1	112251356	112280893	6111	-0.344602	6.16449	1.65707	0.198	0.99989
ENSG00000135919	SERPINE2	serpin peptidase inhibitor, clade E (nexin, plasminogen activator inhibitor type 1), member 2 [Source:HGNC Symbol;Acc:8951]	2	q36.1	-1	224839829	224904036	8891	0.406335	5.94118	1.65661	0.198061	0.99989
ENSG00000165959	CLMN	calmin (calponin-like, transmembrane) [Source:HGNC Symbol;Acc:19972]	14	q32.13	-1	95648277	95786243	15701	-0.308398	6.49026	1.65387	0.198434	0.99989
ENSG00000172757	CFL1	cofilin 1 (non-muscle) [Source:HGNC Symbol;Acc:1874]	11	q13.1	-1	65590493	65629497	5863	-0.25779	9.35934	1.65346	0.198489	0.99989
ENSG00000164171	ITGA2	integrin, alpha 2 (CD49B, alpha 2 subunit of VLA-2 receptor) [Source:HGNC Symbol;Acc:6137]	5	q11.2	1	52285156	52390609	7910	0.495568	5.34474	1.65272	0.19859	0.99989
ENSG00000146535	GNA12	guanine nucleotide binding protein (G protein) alpha 12 [Source:HGNC Symbol;Acc:4380]	7	p22.2	-1	2767746	2883958	6120	-0.344727	4.94842	1.6508	0.19885	0.99989
ENSG00000067365	METTL22	methyltransferase like 22 [Source:HGNC Symbol;Acc:28368]	16	p13.2	1	8715540	8740081	4824	-0.335545	5.58843	1.64627	0.199467	0.99989
ENSG00000119844	AFTPH	aftiphilin [Source:HGNC Symbol;Acc:25951]	2	p14	1	64751465	64820139	5741	0.288198	6.08044	1.64269	0.199956	0.99989
ENSG00000112335	SNX3	sorting nexin 3 [Source:HGNC Symbol;Acc:11174]	6	q21	-1	108532426	108582464	1842	-0.253689	9.11353	1.64254	0.199977	0.99989
ENSG00000150316	CWC15	CWC15 spliceosome-associated protein homolog (S. cerevisiae) [Source:HGNC Symbol;Acc:26939]	11	q21	-1	94695787	94706776	2989	0.376974	5.35682	1.64149	0.200121	0.99989
ENSG00000164329	PAPD4	PAP associated domain containing 4 [Source:HGNC Symbol;Acc:26776]	5	q14.1	1	78907943	78982471	5508	0.334702	5.53887	1.64138	0.200136	0.99989
ENSG00000166037	CEP57	centrosomal protein 57kDa [Source:HGNC Symbol;Acc:30794]	11	q21	1	95523129	95565857	7101	0.329956	4.82667	1.63714	0.200718	0.99989
ENSG00000113569	NUP155	nucleoporin 155kDa [Source:HGNC Symbol;Acc:8063]	5	p13.2	-1	37288239	37371283	9233	-0.973301	3.76274	1.63542	0.200955	0.99989
ENSG00000128595	CALU	calumenin [Source:HGNC Symbol;Acc:1458]	7	q32.1	1	128379346	128411861	4537	-0.337704	6.2296	1.63474	0.201048	0.99989
ENSG00000186111	PIP5K1C	phosphatidylinositol-4-phosphate 5-kinase, type I, gamma [Source:HGNC Symbol;Acc:8996]	19	p13.3	-1	3630181	3700477	6694	-0.4502	4.97183	1.63229	0.201387	0.99989
ENSG00000171858	RPS21	ribosomal protein S21 [Source:HGNC Symbol;Acc:10409]	20	q13.33	1	60962172	60963576	1023	0.404227	7.77881	1.63193	0.201436	0.99989
ENSG00000105939	ZC3HAV1	zinc finger CCCH-type, antiviral 1 [Source:HGNC Symbol;Acc:23721]	7	q34	-1	138728266	138794465	8235	-0.361808	4.68757	1.63079	0.201593	0.99989
ENSG00000047410	TPR	translocated promoter region, nuclear basket protein [Source:HGNC Symbol;Acc:12017]	1	q31.1	-1	186280784	186344825	12350	0.355103	7.03886	1.62949	0.201774	0.99989
ENSG00000074800	ENO1	enolase 1, (alpha) [Source:HGNC Symbol;Acc:3350]	1	p36.23	-1	8921061	8939308	3958	-0.231482	9.78952	1.6279	0.201993	0.99989
ENSG00000125503	PPP1R12C	protein phosphatase 1, regulatory subunit 12C [Source:HGNC Symbol;Acc:14947]	19	q13.42	-1	55602281	55628927	7726	0.380246	4.52352	1.62758	0.202038	0.99989
ENSG00000177868	CCDC23	coiled-coil domain containing 23 [Source:HGNC Symbol;Acc:29204]	1	p34.2	-1	43272723	43282954	1239	0.320481	5.08664	1.62567	0.202303	0.99989
ENSG00000004700	RECQL	RecQ protein-like (DNA helicase Q1-like) [Source:HGNC Symbol;Acc:9948]	12	p12.1	-1	21621845	21654603	3778	0.320064	5.82078	1.62548	0.202329	0.99989
ENSG00000104660	LEPROTL1	leptin receptor overlapping transcript-like 1 [Source:HGNC Symbol;Acc:6555]	8	p12	1	29952914	30034724	5421	0.432496	4.49817	1.62504	0.202391	0.99989
ENSG00000145715	RASA1	RAS p21 protein activator (GTPase activating protein) 1 [Source:HGNC Symbol;Acc:9871]	5	q14.3	1	86563705	86687748	5232	0.433915	4.3039	1.62247	0.202747	0.99989
ENSG00000001629	ANKIB1	ankyrin repeat and IBR domain containing 1 [Source:HGNC Symbol;Acc:22215]	7	q21.2	1	91875548	92030698	7130	0.414333	4.7264	1.62222	0.202783	0.99989
ENSG00000124201	ZNFX1	zinc finger, NFX1-type containing 1 [Source:HGNC Symbol;Acc:29271]	20	q13.13	-1	47854483	47894963	9340	0.39751	4.35036	1.62204	0.202807	0.99989
ENSG00000065534	MYLK	myosin light chain kinase [Source:HGNC Symbol;Acc:7590]	3	q21.1	-1	123328896	123603178	22166	-0.243775	10.6825	1.62183	0.202837	0.99989
ENSG00000110880	CORO1C	coronin, actin binding protein, 1C [Source:HGNC Symbol;Acc:2254]	12	q24.11	-1	109038885	109125372	6532	-0.273754	8.6873	1.62103	0.202949	0.99989
ENSG00000159140	SON	SON DNA binding protein [Source:HGNC Symbol;Acc:11183]	21	q22.11	1	34914924	34949812	13197	0.341605	6.58484	1.61838	0.203317	0.99989
ENSG00000104365	IKBKB	inhibitor of kappa light polypeptide gene enhancer in B-cells, kinase beta [Source:HGNC Symbol;Acc:5960]	8	p11.21	1	42128820	42189973	10041	-0.563163	3.88498	1.61669	0.203554	0.99989
ENSG00000168827	GFM1	G elongation factor, mitochondrial 1 [Source:HGNC Symbol;Acc:13780]	3	q25.32	1	158362067	158410364	9032	-0.652376	3.59196	1.61629	0.203609	0.99989
ENSG00000135164	DMTF1	cyclin D binding myb-like transcription factor 1 [Source:HGNC Symbol;Acc:14603]	7	q21.12	1	86781677	86825653	9417	0.43009	4.48808	1.6137	0.203973	0.99989
ENSG00000172578	KLHL6	kelch-like family member 6 [Source:HGNC Symbol;Acc:18653]	3	q27.1	-1	183205319	183273477	10546	-0.302222	5.56297	1.61368	0.203975	0.99989
ENSG00000147459	DOCK5	dedicator of cytokinesis 5 [Source:HGNC Symbol;Acc:23476]	8	p21.2	1	25042238	25275598	15960	-0.495432	5.14574	1.61359	0.203988	0.99989
ENSG00000166501	PRKCB	protein kinase C, beta [Source:HGNC Symbol;Acc:9395]	16	p12.2	1	23847322	24231932	10037	-0.25549	10.5182	1.61198	0.204213	0.99989
ENSG00000055917	PUM2	pumilio RNA-binding family member 2 [Source:HGNC Symbol;Acc:14958]	2	p24.1	-1	20448452	20551995	6858	0.354446	4.76937	1.61099	0.204353	0.99989
ENSG00000158457	TSPAN33	tetraspanin 33 [Source:HGNC Symbol;Acc:28743]	7	q32.1	1	128784712	128808671	2496	-0.301593	10.889	1.60514	0.205177	0.99989
ENSG00000182287	AP1S2	adaptor-related protein complex 1, sigma 2 subunit [Source:HGNC Symbol;Acc:560]	X	p22.2	-1	15843929	15873054	5362	-0.290235	9.27045	1.60238	0.205567	0.99989
ENSG00000158195	WASF2	WAS protein family, member 2 [Source:HGNC Symbol;Acc:12733]	1	p36.11	-1	27730730	27816669	5666	0.298269	5.80845	1.6014	0.205704	0.99989
ENSG00000198851	CD3E	CD3e molecule, epsilon (CD3-TCR complex) [Source:HGNC Symbol;Acc:1674]	11	q23.3	1	118175260	118186890	2844	0.569817	4.94038	1.59908	0.206033	0.99989
ENSG00000255325			8	q24.13	-1	123497754	123502054	631	-0.433466	6.3754	1.59893	0.206055	0.99989
ENSG00000114742	WDR48	WD repeat domain 48 [Source:HGNC Symbol;Acc:30914]	3	p22.2	1	39093489	39138155	7481	0.482377	4.40506	1.59826	0.206149	0.99989
ENSG00000161091	MFSD12	major facilitator superfamily domain containing 12 [Source:HGNC Symbol;Acc:28299]	19	p13.3	-1	3538259	3574288	5277	-0.76634	3.15167	1.5947	0.206656	0.99989
ENSG00000085117	CD82	CD82 molecule [Source:HGNC Symbol;Acc:6210]	11	p11.2	1	44585977	44641913	4054	-0.308882	7.71345	1.59392	0.206766	0.99989
ENSG00000186409	CCDC30	coiled-coil domain containing 30 [Source:HGNC Symbol;Acc:26103]	1	p34.2	1	42929001	43120335	13539	0.434081	4.36769	1.59325	0.206862	0.99989
ENSG00000144034	TPRKB	TP53RK binding protein [Source:HGNC Symbol;Acc:24259]	2	p13.1	-1	73956231	73964527	2047	0.401036	4.86335	1.59203	0.207036	0.99989
ENSG00000153064	BANK1	B-cell scaffold protein with ankyrin repeats 1 [Source:HGNC Symbol;Acc:18233]	4	q24	1	102332443	102995969	6144	0.263055	9.26237	1.5906	0.20724	0.99989
ENSG00000100401	RANGAP1	Ran GTPase activating protein 1 [Source:HGNC Symbol;Acc:9854]	22	q13.2	-1	41641615	41682255	5463	0.531598	4.03489	1.59	0.207326	0.99989
ENSG00000128585	MKLN1	muskelin 1, intracellular mediator containing kelch motifs [Source:HGNC Symbol;Acc:7109]	7	q32.3	1	130794855	131181395	12878	-0.3088	5.51284	1.58332	0.208283	0.99989
ENSG00000102786	INTS6	integrator complex subunit 6 [Source:HGNC Symbol;Acc:14879]	13	q14.3	-1	51928213	52028400	8817	-0.409466	5.03421	1.57984	0.208784	0.99989
ENSG00000043093	DCUN1D1	DCN1, defective in cullin neddylation 1, domain containing 1 [Source:HGNC Symbol;Acc:18184]	3	q27.1	-1	182655862	182703741	8412	0.306985	5.43976	1.57952	0.20883	0.99989
ENSG00000124702	KLHDC3	kelch domain containing 3 [Source:HGNC Symbol;Acc:20704]	6	p21.1	1	42981951	42989036	2058	-0.356859	5.30509	1.57648	0.209268	0.99989
ENSG00000175203	DCTN2	dynactin 2 (p50) [Source:HGNC Symbol;Acc:2712]	12	q13.3	-1	57923885	57941114	4239	-0.207717	8.18591	1.57552	0.209408	0.99989
ENSG00000159210	SNF8	SNF8, ESCRT-II complex subunit [Source:HGNC Symbol;Acc:17028]	17	q21.32	-1	47006678	47022479	5270	-0.405091	4.10918	1.57272	0.209812	0.99989
ENSG00000092841	MYL6	myosin, light chain 6, alkali, smooth muscle and non-muscle [Source:HGNC Symbol;Acc:7587]	12	q13.2	1	56551945	56557280	4609	-0.278253	11.9906	1.57268	0.209818	0.99989
ENSG00000113387	SUB1	SUB1 homolog (S. cerevisiae) [Source:HGNC Symbol;Acc:19985]	5	p13.3	1	32531739	32604185	9324	0.304546	6.8491	1.57179	0.209948	0.99989
ENSG00000165732	DDX21	DEAD (Asp-Glu-Ala-Asp) box helicase 21 [Source:HGNC Symbol;Acc:2744]	10	q22.1	1	70715884	70744829	4711	0.358416	4.71171	1.57102	0.210059	0.99989
ENSG00000054356	PTPRN	protein tyrosine phosphatase, receptor type, N [Source:HGNC Symbol;Acc:9676]	2	q35	-1	220154345	220174370	8261	-0.420577	5.12293	1.56963	0.21026	0.99989
ENSG00000115738	ID2	inhibitor of DNA binding 2, dominant negative helix-loop-helix protein [Source:HGNC Symbol;Acc:5361]	2	p25.1	1	8818975	8824583	2205	0.43752	5.44365	1.56114	0.211499	0.99989
ENSG00000119655	NPC2	Niemann-Pick disease, type C2 [Source:HGNC Symbol;Acc:14537]	14	q24.3	-1	74942895	74960880	2749	-0.238082	6.79739	1.55999	0.211666	0.99989
ENSG00000146729	GBAS	glioblastoma amplified sequence [Source:HGNC Symbol;Acc:4179]	7	p11.2	1	56019486	56067874	5651	-0.445991	4.47955	1.55159	0.2129	0.99989
ENSG00000166340	TPP1	tripeptidyl peptidase I [Source:HGNC Symbol;Acc:2073]	11	p15.4	-1	6634000	6640692	4895	-0.285518	8.78308	1.54956	0.213201	0.99989
ENSG00000150977	RILPL2	Rab interacting lysosomal protein-like 2 [Source:HGNC Symbol;Acc:28787]	12	q24.31	-1	123899936	123921264	1435	-0.274272	5.62218	1.54773	0.213471	0.99989
ENSG00000104529	EEF1D	eukaryotic translation elongation factor 1 delta (guanine nucleotide exchange protein) [Source:HGNC Symbol;Acc:3211]	8	q24.3	-1	144661867	144681711	9390	0.356436	7.28654	1.54768	0.213478	0.99989
ENSG00000005302	MSL3	male-specific lethal 3 homolog (Drosophila) [Source:HGNC Symbol;Acc:7370]	X	p22.2	1	11776278	11793870	6494	0.379113	5.01678	1.5474	0.213519	0.99989
ENSG00000138443	ABI2	abl-interactor 2 [Source:HGNC Symbol;Acc:24011]	2	q33.2	1	204192942	204312446	23220	-0.332382	5.80843	1.54472	0.213916	0.99989
ENSG00000186566	GPATCH8	G patch domain containing 8 [Source:HGNC Symbol;Acc:29066]	17	q21.31	-1	42472652	42580798	9442	0.403551	4.43155	1.54282	0.214199	0.99989
ENSG00000099995	SF3A1	splicing factor 3a, subunit 1, 120kDa [Source:HGNC Symbol;Acc:10765]	22	q12.2	-1	30727977	30752936	6329	-0.347284	5.98297	1.54234	0.21427	0.99989
ENSG00000165309	ARMC3	armadillo repeat containing 3 [Source:HGNC Symbol;Acc:30964]	10	p12.2	1	23216953	23326518	6065	-0.314394	7.09471	1.54154	0.214389	0.99989
ENSG00000167005	NUDT21	nudix (nucleoside diphosphate linked moiety X)-type motif 21 [Source:HGNC Symbol;Acc:13870]	16	q12.2	-1	56463045	56486111	5474	-0.244916	5.91149	1.5412	0.21444	0.99989
ENSG00000177663	IL17RA	interleukin 17 receptor A [Source:HGNC Symbol;Acc:5985]	22	q11.1	1	17565844	17596583	9035	-0.458705	4.34117	1.54022	0.214586	0.99989
ENSG00000166979	EVA1C	eva-1 homolog C (C. elegans) [Source:HGNC Symbol;Acc:13239]	21	q22.11	1	33784314	33887707	4353	-0.337499	5.73414	1.5398	0.214648	0.99989
ENSG00000198056	PRIM1	primase, DNA, polypeptide 1 (49kDa) [Source:HGNC Symbol;Acc:9369]	12	q13.3	-1	57125380	57146157	2437	0.421455	4.47626	1.53808	0.214904	0.99989
ENSG00000183963	SMTN	smoothelin [Source:HGNC Symbol;Acc:11126]	22	q12.2	1	31460091	31500743	10094	-0.404901	5.10401	1.53439	0.215454	0.99989
ENSG00000149781	FERMT3	fermitin family member 3 [Source:HGNC Symbol;Acc:23151]	11	q13.1	1	63974150	63991354	3062	-0.271264	11.6216	1.5339	0.215528	0.99989
ENSG00000166337	TAF10	TAF10 RNA polymerase II, TATA box binding protein (TBP)-associated factor, 30kDa [Source:HGNC Symbol;Acc:11543]	11	p15.4	-1	6627526	6633898	6104	-0.291616	9.13842	1.53205	0.215806	0.99989
ENSG00000185404	SP140L	SP140 nuclear body protein-like [Source:HGNC Symbol;Acc:25105]	2	q37.1	1	231191899	231268447	5650	0.537238	3.96658	1.52971	0.216156	0.99989
ENSG00000198648	STK39	serine threonine kinase 39 [Source:HGNC Symbol;Acc:17717]	2	q24.3	-1	168810530	169104651	4247	0.329309	5.31257	1.52829	0.216369	0.99989
ENSG00000163736	PPBP	pro-platelet basic protein (chemokine (C-X-C motif) ligand 7) [Source:HGNC Symbol;Acc:9240]	4	q13.3	-1	74852755	74853914	715	-0.285204	15.0951	1.5231	0.217151	0.99989
ENSG00000145241	CENPC	centromere protein C [Source:HGNC Symbol;Acc:1854]	4	q13.2	-1	68337521	68411324	5558	0.443621	4.94461	1.52293	0.217177	0.99989
ENSG00000048052	HDAC9	histone deacetylase 9 [Source:HGNC Symbol;Acc:14065]	7	p21.1	1	18126572	19042039	16827	-0.303652	4.85702	1.52268	0.217214	0.99989
ENSG00000119487	MAPKAP1	mitogen-activated protein kinase associated protein 1 [Source:HGNC Symbol;Acc:18752]	9	q33.3	-1	128199672	128469513	6741	0.356574	4.90692	1.52123	0.217433	0.99989
ENSG00000114353	GNAI2	guanine nucleotide binding protein (G protein), alpha inhibiting activity polypeptide 2 [Source:HGNC Symbol;Acc:4385]	3	p21.31	1	50263724	50296787	7650	-0.200891	9.31275	1.52105	0.217461	0.99989
ENSG00000147853	AK3	adenylate kinase 3 [Source:HGNC Symbol;Acc:17376]	9	p24.1	-1	4711155	4742043	2808	-0.26765	6.3696	1.51998	0.217622	0.99989
ENSG00000126524	SBDS	Shwachman-Bodian-Diamond syndrome [Source:HGNC Symbol;Acc:19440]	7	q11.21	-1	66452664	66460588	1732	0.290861	5.02875	1.51906	0.217761	0.99989
ENSG00000112305	SMAP1	small ArfGAP 1 [Source:HGNC Symbol;Acc:19651]	6	q13	1	71377479	71571718	4343	0.290017	5.49492	1.51811	0.217905	0.99989
ENSG00000138190	EXOC6	exocyst complex component 6 [Source:HGNC Symbol;Acc:23196]	10	q23.33	1	94590935	94819250	6359	0.382106	4.93707	1.51789	0.217938	0.99989
ENSG00000236936			1	p36.12	1	21592575	21593744	723	-0.366959	5.07756	1.51753	0.217993	0.99989
ENSG00000223380	SEC22B	SEC22 vesicle trafficking protein homolog B (S. cerevisiae) (gene/pseudogene) [Source:HGNC Symbol;Acc:10700]	1	q21.1	1	145096220	145116922	2356	-0.305972	4.47157	1.5174	0.218014	0.99989
ENSG00000122033	MTIF3	mitochondrial translational initiation factor 3 [Source:HGNC Symbol;Acc:29788]	13	q12.2	-1	28009776	28024739	1592	0.344767	4.37184	1.51726	0.218035	0.99989
ENSG00000185000	DGAT1	diacylglycerol O-acyltransferase 1 [Source:HGNC Symbol;Acc:2843]	8	q24.3	-1	145539954	145550573	2425	0.789784	3.9338	1.51585	0.218248	0.99989
ENSG00000100997	ABHD12	abhydrolase domain containing 12 [Source:HGNC Symbol;Acc:15868]	20	p11.21	-1	25275379	25371619	3429	-0.406355	4.26442	1.51268	0.218731	0.99989
ENSG00000177479	ARIH2	ariadne RBR E3 ubiquitin protein ligase 2 [Source:HGNC Symbol;Acc:690]	3	p21.31	1	48956254	49023815	8017	-0.270192	5.71738	1.51244	0.218768	0.99989
ENSG00000115464	USP34	ubiquitin specific peptidase 34 [Source:HGNC Symbol;Acc:20066]	2	p15	-1	61414598	61697904	18125	0.281546	6.70156	1.50763	0.219502	0.99989
ENSG00000139624	CERS5	ceramide synthase 5 [Source:HGNC Symbol;Acc:23749]	12	q13.12	-1	50523575	50561288	6235	-0.337892	4.68967	1.50711	0.21958	0.99989
ENSG00000169129	AFAP1L2	actin filament associated protein 1-like 2 [Source:HGNC Symbol;Acc:25901]	10	q25.3	-1	116054583	116164515	5948	-0.447153	5.47686	1.50295	0.220218	0.99989
ENSG00000187098	MITF	microphthalmia-associated transcription factor [Source:HGNC Symbol;Acc:7105]	3	p14.1	1	69788586	70017488	7222	-0.29487	6.71581	1.49595	0.221296	0.99989
ENSG00000111802	TDP2	tyrosyl-DNA phosphodiesterase 2 [Source:HGNC Symbol;Acc:17768]	6	p22.3	-1	24650205	24667261	3082	-0.317968	5.00008	1.4937	0.221643	0.99989
ENSG00000253796			8	q23.1	-1	109907258	110075646	890	0.507852	4.1119	1.49199	0.221907	0.99989
ENSG00000234810			1	p32.3	1	56046710	56200675	4063	-0.359492	5.45427	1.4907	0.222108	0.99989
ENSG00000143554	SLC27A3	solute carrier family 27 (fatty acid transporter), member 3 [Source:HGNC Symbol;Acc:10997]	1	q21.3	1	153746830	153752633	5470	-0.868151	3.34054	1.4892	0.222341	0.99989
ENSG00000151136	BTBD11	BTB (POZ) domain containing 11 [Source:HGNC Symbol;Acc:23844]	12	q23.3	1	107712190	108053419	7924	-0.700951	4.65684	1.48857	0.222439	0.99989
ENSG00000132670	PTPRA	protein tyrosine phosphatase, receptor type, A [Source:HGNC Symbol;Acc:9664]	20	p13	1	2844830	3019722	4509	-0.201749	8.22681	1.48661	0.222744	0.99989
ENSG00000158406	HIST1H4H	histone cluster 1, H4h [Source:HGNC Symbol;Acc:4788]	6	p22.2	-1	26281283	26285762	1034	0.487013	7.43031	1.48626	0.222797	0.99989
ENSG00000071243	ING3	inhibitor of growth family, member 3 [Source:HGNC Symbol;Acc:14587]	7	q31.31	1	120590803	120617270	5214	0.29772	4.94036	1.48584	0.222863	0.99989
ENSG00000229117	RPL41	ribosomal protein L41 [Source:HGNC Symbol;Acc:10354]	12	q13.2	1	56510370	56511727	1088	0.286972	7.68908	1.48314	0.223284	0.99989
ENSG00000123472	ATPAF1	ATP synthase mitochondrial F1 complex assembly factor 1 [Source:HGNC Symbol;Acc:18803]	1	p33	-1	47098409	47139539	5654	-0.322779	5.64109	1.48286	0.223328	0.99989
ENSG00000124733	MEA1	male-enhanced antigen 1 [Source:HGNC Symbol;Acc:6986]	6	p21.1	-1	42979832	42981706	1089	-0.249298	6.98752	1.4826	0.223368	0.99989
ENSG00000113356	POLR3G	polymerase (RNA) III (DNA directed) polypeptide G (32kD) [Source:HGNC Symbol;Acc:30075]	5	q14.3	1	89767565	89810370	4019	0.359493	8.25112	1.4808	0.22365	0.99989
ENSG00000257261			12	q13.11	1	46777462	46850051	884	0.414476	5.00791	1.48041	0.22371	0.99989
ENSG00000142765	SYTL1	synaptotagmin-like 1 [Source:HGNC Symbol;Acc:15584]	1	p36.11	1	27668513	27680421	5575	0.420336	5.37205	1.4796	0.223838	0.99989
ENSG00000244509	APOBEC3C	apolipoprotein B mRNA editing enzyme, catalytic polypeptide-like 3C [Source:HGNC Symbol;Acc:17353]	22	q13.1	1	39410088	39416357	2818	-0.236715	6.19019	1.4785	0.22401	0.99989
ENSG00000196735	HLA-DQA1	major histocompatibility complex, class II, DQ alpha 1 [Source:HGNC Symbol;Acc:4942]	6	p21.32	1	32595956	32614839	6927	0.638967	3.47919	1.47653	0.224318	0.99989
ENSG00000105229	PIAS4	protein inhibitor of activated STAT, 4 [Source:HGNC Symbol;Acc:17002]	19	p13.3	1	4007644	4039384	3646	-0.322915	4.88918	1.47402	0.224713	0.99989
ENSG00000006459	KDM7A	lysine (K)-specific demethylase 7A [Source:HGNC Symbol;Acc:22224]	7	q34	-1	139784546	139876835	9430	0.30968	6.43838	1.47163	0.225088	0.99989
ENSG00000123609	NMI	N-myc (and STAT) interactor [Source:HGNC Symbol;Acc:7854]	2	q23.3	-1	152126979	152146571	3480	0.373496	6.62578	1.46961	0.225408	0.99989
ENSG00000164163	ABCE1	ATP-binding cassette, sub-family E (OABP), member 1 [Source:HGNC Symbol;Acc:69]	4	q31.21	1	146019084	146050331	6265	-0.769388	3.53233	1.46277	0.22649	0.99989
ENSG00000150054	MPP7	membrane protein, palmitoylated 7 (MAGUK p55 subfamily member 7) [Source:HGNC Symbol;Acc:26542]	10	p12.1	-1	28339922	28623415	6577	0.31149	5.28565	1.45768	0.2273	0.99989
ENSG00000117400	MPL	myeloproliferative leukemia virus oncogene [Source:HGNC Symbol;Acc:7217]	1	p34.2	1	43803478	43818443	2128	-0.358547	5.81237	1.45763	0.227307	0.99989
ENSG00000042753	AP2S1	adaptor-related protein complex 2, sigma 1 subunit [Source:HGNC Symbol;Acc:565]	19	q13.32	-1	47341393	47354249	1704	-0.289532	7.03224	1.45667	0.227461	0.99989
ENSG00000105122	RASAL3	RAS protein activator like 3 [Source:HGNC Symbol;Acc:26129]	19	p13.12	-1	15562435	15575382	4681	0.425522	5.3635	1.4547	0.227775	0.99989
ENSG00000164116	GUCY1A3	guanylate cyclase 1, soluble, alpha 3 [Source:HGNC Symbol;Acc:4685]	4	q32.1	1	156587863	156653501	5766	-0.332454	8.66629	1.45365	0.227944	0.99989
ENSG00000132780	NASP	nuclear autoantigenic sperm protein (histone-binding) [Source:HGNC Symbol;Acc:7644]	1	p34.1	1	46049518	46084566	8293	0.374546	5.36169	1.45304	0.228041	0.99989
ENSG00000085733	CTTN	cortactin [Source:HGNC Symbol;Acc:3338]	11	q13.3	1	70244510	70282690	6949	-0.281268	9.13977	1.45211	0.22819	0.99989
ENSG00000167645	YIF1B	Yip1 interacting factor homolog B (S. cerevisiae) [Source:HGNC Symbol;Acc:30511]	19	q13.2	-1	38795753	38807913	3184	-0.255394	7.89697	1.44971	0.228574	0.99989
ENSG00000102230	PCYT1B	phosphate cytidylyltransferase 1, choline, beta [Source:HGNC Symbol;Acc:8755]	X	p22.11	-1	24576204	24690794	5555	-0.330068	5.46757	1.44666	0.229065	0.99989
ENSG00000082212	ME2	malic enzyme 2, NAD(+)-dependent, mitochondrial [Source:HGNC Symbol;Acc:6984]	18	q21.2	1	48405419	48474691	3427	-0.384954	5.53735	1.44602	0.229168	0.99989
ENSG00000159202	UBE2Z	ubiquitin-conjugating enzyme E2Z [Source:HGNC Symbol;Acc:25847]	17	q21.32	1	46985731	47006418	5753	-0.331339	4.622	1.44409	0.229479	0.99989
ENSG00000118193	KIF14	kinesin family member 14 [Source:HGNC Symbol;Acc:19181]	1	q32.1	-1	200520628	200589862	7274	0.507281	4.15461	1.44379	0.229526	0.99989
ENSG00000198373	WWP2	WW domain containing E3 ubiquitin protein ligase 2 [Source:HGNC Symbol;Acc:16804]	16	q22.1	1	69796209	69975644	9053	-0.501742	4.50659	1.43949	0.230222	0.99989
ENSG00000114956	DGUOK	deoxyguanosine kinase [Source:HGNC Symbol;Acc:2858]	2	p13.1	1	74153953	74186088	1455	0.263188	5.11011	1.43646	0.230713	0.99989
ENSG00000156110	ADK	adenosine kinase [Source:HGNC Symbol;Acc:257]	10	q22.2	1	75910960	76469061	2970	0.455941	4.77169	1.43446	0.231038	0.99989
ENSG00000178685	PARP10	poly (ADP-ribose) polymerase family, member 10 [Source:HGNC Symbol;Acc:25895]	8	q24.3	-1	145051321	145086940	6033	0.554923	3.62945	1.43436	0.231053	0.99989
ENSG00000125375	ATP5S	ATP synthase, H+ transporting, mitochondrial Fo complex, subunit s (factor B) [Source:HGNC Symbol;Acc:18799]	14	q21.3	1	50779044	50802276	3664	-0.283686	6.20333	1.43312	0.231256	0.99989
ENSG00000197555	SIPA1L1	signal-induced proliferation-associated 1 like 1 [Source:HGNC Symbol;Acc:20284]	14	q24.2	1	71787166	72207946	12412	0.518556	4.01597	1.43022	0.231729	0.99989
ENSG00000166562	SEC11C	SEC11 homolog C (S. cerevisiae) [Source:HGNC Symbol;Acc:23400]	18	q21.32	1	56806709	56826068	3656	0.49068	4.49869	1.42644	0.232347	0.99989
ENSG00000205981	DNAJC19	DnaJ (Hsp40) homolog, subfamily C, member 19 [Source:HGNC Symbol;Acc:30528]	3	q26.33	-1	180701497	180707562	3586	0.538152	3.95022	1.42478	0.232618	0.99989
ENSG00000100225	FBXO7	F-box protein 7 [Source:HGNC Symbol;Acc:13586]	22	q12.3	1	32870663	32894818	8523	-0.261077	9.08609	1.42124	0.233199	0.99989
ENSG00000168439	STIP1	stress-induced-phosphoprotein 1 [Source:HGNC Symbol;Acc:11387]	11	q13.1	1	63952744	63972015	4657	-0.330821	5.11778	1.4211	0.233223	0.99989
ENSG00000114166	KAT2B	K(lysine) acetyltransferase 2B [Source:HGNC Symbol;Acc:8638]	3	p24.3	1	20081515	20195896	5634	0.306548	5.67226	1.4199	0.233419	0.99989
ENSG00000163536	SERPINI1	serpin peptidase inhibitor, clade I (neuroserpin), member 1 [Source:HGNC Symbol;Acc:8943]	3	q26.1	1	167453031	167543356	2418	0.411962	4.82697	1.41782	0.233763	0.99989
ENSG00000101193	GID8	GID complex subunit 8 [Source:HGNC Symbol;Acc:15857]	20	q13.33	1	61569471	61576996	1791	-0.265348	4.61484	1.41751	0.233814	0.99989
ENSG00000067560	RHOA	ras homolog family member A [Source:HGNC Symbol;Acc:667]	3	p21.31	-1	49396578	49450431	2582	-0.213618	9.97377	1.41713	0.233877	0.99989
ENSG00000149084	HSD17B12	hydroxysteroid (17-beta) dehydrogenase 12 [Source:HGNC Symbol;Acc:18646]	11	p11.2	1	43577986	43878167	8600	-0.325702	5.22753	1.41604	0.234057	0.99989
ENSG00000233822	HIST1H2BN	histone cluster 1, H2bn [Source:HGNC Symbol;Acc:4749]	6	p22.1	1	27806323	27823487	4265	0.360895	6.3018	1.41267	0.234613	0.99989
ENSG00000172869	DMXL1	Dmx-like 1 [Source:HGNC Symbol;Acc:2937]	5	q23.1	1	118373467	118584833	13579	0.345535	5.11198	1.41108	0.234878	0.99989
ENSG00000111540	RAB5B	RAB5B, member RAS oncogene family [Source:HGNC Symbol;Acc:9784]	12	q13.2	1	56367697	56388490	4611	-0.331235	4.61462	1.40887	0.235245	0.99989
ENSG00000169891	REPS2	RALBP1 associated Eps domain containing 2 [Source:HGNC Symbol;Acc:9963]	X	p22.2	1	16964814	17171395	11361	-0.286374	6.68046	1.40807	0.235377	0.99989
ENSG00000167283	ATP5L	ATP synthase, H+ transporting, mitochondrial Fo complex, subunit G [Source:HGNC Symbol;Acc:14247]	11	q23.3	1	118271869	118302211	3376	-0.243714	8.15235	1.40734	0.235498	0.99989
ENSG00000166681	NGFRAP1	nerve growth factor receptor (TNFRSF16) associated protein 1 [Source:HGNC Symbol;Acc:13388]	X	q22.2	1	102631268	102633005	1362	-0.338227	8.93032	1.4065	0.235638	0.99989
ENSG00000229164	TRAC	T cell receptor alpha constant [Source:HGNC Symbol;Acc:12029]	14	q11.2	1	23016447	23021097	974	0.542119	6.0007	1.40615	0.235697	0.99989
ENSG00000116701	NCF2	neutrophil cytosolic factor 2 [Source:HGNC Symbol;Acc:7661]	1	q25.3	-1	183524698	183560011	2928	-0.502505	6.20098	1.40456	0.235961	0.99989
ENSG00000165487	MICU2	mitochondrial calcium uptake 2 [Source:HGNC Symbol;Acc:31830]	13	q12.11	-1	22066836	22178353	3639	-0.375695	4.83962	1.40414	0.236032	0.99989
ENSG00000154310	TNIK	TRAF2 and NCK interacting kinase [Source:HGNC Symbol;Acc:30765]	3	q26.31	-1	170779128	171178197	8572	0.27363	6.7375	1.40387	0.236077	0.99989
ENSG00000141030	COPS3	COP9 signalosome subunit 3 [Source:HGNC Symbol;Acc:2239]	17	p11.2	-1	17150141	17184607	2781	-0.220252	6.9757	1.40169	0.236441	0.99989
ENSG00000107262	BAG1	BCL2-associated athanogene [Source:HGNC Symbol;Acc:937]	9	p13.3	-1	33247818	33264761	7108	0.232815	6.54712	1.39799	0.237061	0.99989
ENSG00000148498	PARD3	par-3 family cell polarity regulator [Source:HGNC Symbol;Acc:16051]	10	p11.21	-1	34398488	35104253	6513	-0.286523	8.41635	1.39695	0.237234	0.99989
ENSG00000082781	ITGB5	integrin, beta 5 [Source:HGNC Symbol;Acc:6160]	3	q21.2	-1	124480795	124620265	6447	-0.272779	10.1638	1.39565	0.237452	0.99989
ENSG00000137492	PRKRIR	protein-kinase, interferon-inducible double stranded RNA dependent inhibitor, repressor of (P58 repressor) [Source:HGNC Symbol;Acc:9440]	11	q13.5	-1	76061000	76092015	7727	-0.275278	4.86028	1.39395	0.237739	0.99989
ENSG00000111667	USP5	ubiquitin specific peptidase 5 (isopeptidase T) [Source:HGNC Symbol;Acc:12628]	12	p13.31	1	6961292	6975796	3738	0.495465	4.04998	1.39391	0.237745	0.99989
ENSG00000197321	SVIL	supervillin [Source:HGNC Symbol;Acc:11480]	10	p11.23	-1	29746267	30025710	10341	-0.290469	6.09119	1.39384	0.237758	0.99989
ENSG00000147535	PPAPDC1B	phosphatidic acid phosphatase type 2 domain containing 1B [Source:HGNC Symbol;Acc:25026]	8	p11.23	-1	38120648	38126761	4414	-0.282568	5.36989	1.39326	0.237855	0.99989
ENSG00000135108	FBXO21	F-box protein 21 [Source:HGNC Symbol;Acc:13592]	12	q24.22	-1	117581146	117628336	5596	-0.662294	3.41871	1.39097	0.238241	0.99989
ENSG00000146112	PPP1R18	protein phosphatase 1, regulatory subunit 18 [Source:HGNC Symbol;Acc:29413]	6	p21.33	-1	30644166	30655672	4599	-0.357568	4.09928	1.38956	0.238479	0.99989
ENSG00000167632	TRAPPC9	trafficking protein particle complex 9 [Source:HGNC Symbol;Acc:30832]	8	q24.3	-1	140742586	141468678	34988	-0.312175	6.77281	1.38883	0.238603	0.99989
ENSG00000213654	GPSM3	G-protein signaling modulator 3 [Source:HGNC Symbol;Acc:13945]	6	p21.32	-1	32158543	32163300	1854	-0.379136	5.09118	1.38758	0.238814	0.99989
ENSG00000176953	NFATC2IP	nuclear factor of activated T-cells, cytoplasmic, calcineurin-dependent 2 interacting protein [Source:HGNC Symbol;Acc:25906]	16	p11.2	1	28962128	28978418	5738	-0.354865	4.1062	1.38356	0.239496	0.99989
ENSG00000170634	ACYP2	acylphosphatase 2, muscle type [Source:HGNC Symbol;Acc:180]	2	p16.2	1	54197975	54532437	4964	0.305693	4.88391	1.38315	0.239565	0.99989
ENSG00000144591	GMPPA	GDP-mannose pyrophosphorylase A [Source:HGNC Symbol;Acc:22923]	2	q35	1	220363589	220371710	5331	0.493464	3.84037	1.37739	0.240545	0.99989
ENSG00000131165	CHMP1A	charged multivesicular body protein 1A [Source:HGNC Symbol;Acc:8740]	16	q24.3	-1	89710839	89724253	3208	-0.361847	4.12704	1.37543	0.240881	0.99989
ENSG00000102054	RBBP7	retinoblastoma binding protein 7 [Source:HGNC Symbol;Acc:9890]	X	p22.2	-1	16857406	16888537	7392	-0.203412	6.73327	1.37489	0.240973	0.99989
ENSG00000135372	NAT10	N-acetyltransferase 10 (GCN5-related) [Source:HGNC Symbol;Acc:29830]	11	p13	1	34127149	34169217	5242	-0.671874	3.82827	1.37464	0.241016	0.99989
ENSG00000198356	ASNA1	arsA arsenite transporter, ATP-binding, homolog 1 (bacterial) [Source:HGNC Symbol;Acc:752]	19	p13.2	1	12847953	12859137	1652	-0.233099	6.1169	1.37386	0.24115	0.99989
ENSG00000197746	PSAP	prosaposin [Source:HGNC Symbol;Acc:9498]	10	q22.1	-1	73576055	73611126	3224	-0.312068	10.8144	1.37364	0.241187	0.99989
ENSG00000148426	PROSER2	proline and serine-rich protein 2 [Source:HGNC Symbol;Acc:23728]	10	p14	1	11865338	11914276	3663	-0.343505	4.24253	1.37336	0.241236	0.99989
ENSG00000112983	BRD8	bromodomain containing 8 [Source:HGNC Symbol;Acc:19874]	5	q31.2	-1	137475455	137514675	7046	0.628058	3.83521	1.37057	0.241713	0.99989
ENSG00000130429	ARPC1B	actin related protein 2/3 complex, subunit 1B, 41kDa [Source:HGNC Symbol;Acc:704]	7	q22.1	1	98971872	98992424	3979	-0.28048	11.6814	1.37024	0.24177	0.99989
ENSG00000136279	DBNL	drebrin-like [Source:HGNC Symbol;Acc:2696]	7	p13	1	44084239	44109055	12587	-0.225908	8.97121	1.36858	0.242055	0.99989
ENSG00000196199	MPHOSPH8	M-phase phosphoprotein 8 [Source:HGNC Symbol;Acc:29810]	13	q12.11	1	20207788	20247599	4786	0.39134	5.29197	1.36453	0.242754	0.99989
ENSG00000153786	ZDHHC7	zinc finger, DHHC-type containing 7 [Source:HGNC Symbol;Acc:18459]	16	q24.1	-1	85007787	85045141	3947	-0.38675	4.8532	1.36145	0.243287	0.99989
ENSG00000227165	WDR11-AS1	WDR11 antisense RNA 1 [Source:HGNC Symbol;Acc:27437]	10	q26.12	-1	122521324	122610721	3398	-0.28638	8.07662	1.35983	0.243566	0.99989
ENSG00000124772	CPNE5	copine V [Source:HGNC Symbol;Acc:2318]	6	p21.2	-1	36708552	36807778	4067	-0.345315	6.90681	1.3591	0.243693	0.99989
ENSG00000156256	USP16	ubiquitin specific peptidase 16 [Source:HGNC Symbol;Acc:12614]	21	q21.3	1	30396950	30426809	5694	0.383327	5.58047	1.35781	0.243917	0.99989
ENSG00000143776	CDC42BPA	CDC42 binding protein kinase alpha (DMPK-like) [Source:HGNC Symbol;Acc:1737]	1	q42.13	-1	227177566	227506175	14055	0.350567	5.55805	1.35774	0.24393	0.99989
ENSG00000104763	ASAH1	N-acylsphingosine amidohydrolase (acid ceramidase) 1 [Source:HGNC Symbol;Acc:735]	8	p22	-1	17913934	17942494	5051	-0.22103	10.3829	1.35374	0.244626	0.99989
ENSG00000138069	RAB1A	RAB1A, member RAS oncogene family [Source:HGNC Symbol;Acc:9758]	2	p14	-1	65297835	65357240	2974	0.347562	5.38748	1.35344	0.244678	0.99989
ENSG00000108055	SMC3	structural maintenance of chromosomes 3 [Source:HGNC Symbol;Acc:2468]	10	q25.2	1	112327449	112364394	4275	0.279738	6.70039	1.35229	0.244878	0.99989
ENSG00000238201			2	p14	-1	64565201	64568781	404	-0.3645	7.73275	1.34922	0.245415	0.99989
ENSG00000254087	LYN	v-yes-1 Yamaguchi sarcoma viral related oncogene homolog [Source:HGNC Symbol;Acc:6735]	8	q12.1	1	56792372	56923940	3398	-0.226847	8.93668	1.34887	0.245475	0.99989
ENSG00000048028	USP28	ubiquitin specific peptidase 28 [Source:HGNC Symbol;Acc:12625]	11	q23.2	-1	113668596	113746292	5719	0.496847	4.47962	1.3475	0.245715	0.99989
ENSG00000106868	SUSD1	sushi domain containing 1 [Source:HGNC Symbol;Acc:25413]	9	q32	-1	114803065	114937688	4183	-0.262792	9.01459	1.34498	0.246158	0.99989
ENSG00000107890	ANKRD26	ankyrin repeat domain 26 [Source:HGNC Symbol;Acc:29186]	10	p12.1	-1	27280843	27389421	8241	0.596257	3.88253	1.34385	0.246356	0.99989
ENSG00000108010	GLRX3	glutaredoxin 3 [Source:HGNC Symbol;Acc:15987]	10	q26.3	1	131934663	131982785	2275	-0.248254	7.14683	1.34383	0.246359	0.99989
ENSG00000257207		LIM and senescent cell antigen-like-containing domain protein 3; Uncharacterized protein; cDNA FLJ59124, highly similar to Particularly interesting newCys-His protein; cDNA, FLJ79109, highly similar to Particularly interesting newCys-His protein [Source:UniProtKB/TrEMBL;Acc:B4DPH6]	2	q13	-1	111160511	111230652	3202	-0.798528	8.90343	1.34334	0.246445	0.99989
ENSG00000066933	MYO9A	myosin IXA [Source:HGNC Symbol;Acc:7608]	15	q23	-1	72114632	72410918	20250	0.441584	4.15751	1.34321	0.246469	0.99989
ENSG00000087274	ADD1	adducin 1 (alpha) [Source:HGNC Symbol;Acc:243]	4	p16.3	1	2845584	2931803	13106	-0.264814	7.40355	1.34078	0.246896	0.99989
ENSG00000068650	ATP11A	ATPase, class VI, type 11A [Source:HGNC Symbol;Acc:13552]	13	q34	1	113344643	113541482	12172	-0.398294	4.36579	1.34044	0.246956	0.99989
ENSG00000100941	PNN	pinin, desmosome associated protein [Source:HGNC Symbol;Acc:9162]	14	q21.1	1	39644387	39652422	4201	0.349584	5.84846	1.34012	0.247013	0.99989
ENSG00000118181	RPS25	ribosomal protein S25 [Source:HGNC Symbol;Acc:10413]	11	q23.3	-1	118886422	118889401	1477	0.328237	7.12935	1.3388	0.247246	0.99989
ENSG00000197451	HNRNPAB	heterogeneous nuclear ribonucleoprotein A/B [Source:HGNC Symbol;Acc:5034]	5	q35.3	1	177631508	177638164	2144	0.308202	4.86987	1.33755	0.247467	0.99989
ENSG00000122565	CBX3	chromobox homolog 3 [Source:HGNC Symbol;Acc:1553]	7	p15.2	1	26240782	26252976	4641	0.270579	7.00762	1.33718	0.247531	0.99989
ENSG00000154146	NRGN	neurogranin (protein kinase C substrate, RC3) [Source:HGNC Symbol;Acc:8000]	11	q24.2	1	124609742	124617106	1309	-0.332955	8.91656	1.33541	0.247846	0.99989
ENSG00000165682	CLEC1B	C-type lectin domain family 1, member B [Source:HGNC Symbol;Acc:24356]	12	p13.2	-1	10138241	10166023	3670	0.315418	8.57987	1.33402	0.248091	0.99989
ENSG00000069345	DNAJA2	DnaJ (Hsp40) homolog, subfamily A, member 2 [Source:HGNC Symbol;Acc:14884]	16	q12.1	-1	46989299	47007699	5039	-0.240876	5.69877	1.33211	0.248431	0.99989
ENSG00000186577	C6orf1	chromosome 6 open reading frame 1 [Source:HGNC Symbol;Acc:1340]	6	p21.31	-1	34214157	34217247	2229	-0.34619	4.3325	1.3304	0.248734	0.99989
ENSG00000165389	SPTSSA	serine palmitoyltransferase, small subunit A [Source:HGNC Symbol;Acc:20361]	14	q13.1	-1	34901995	34931562	2777	-0.400857	4.20857	1.32658	0.249415	0.99989
ENSG00000183621	ZNF438	zinc finger protein 438 [Source:HGNC Symbol;Acc:21029]	10	p11.22	-1	31109136	31320866	4294	0.359267	6.97363	1.32214	0.250209	0.99989
ENSG00000124491	F13A1	coagulation factor XIII, A1 polypeptide [Source:HGNC Symbol;Acc:3531]	6	p25.1	-1	6144318	6321246	4690	-0.282216	13.6399	1.3209	0.250431	0.99989
ENSG00000066322	ELOVL1	ELOVL fatty acid elongase 1 [Source:HGNC Symbol;Acc:14418]	1	p34.2	-1	43829068	43833696	2458	0.36998	4.04246	1.31994	0.250602	0.99989
ENSG00000137364	TPMT	thiopurine S-methyltransferase [Source:HGNC Symbol;Acc:12014]	6	p22.3	-1	18128542	18155305	3181	-0.460171	3.8007	1.31894	0.250783	0.99989
ENSG00000100364	KIAA0930	KIAA0930 [Source:HGNC Symbol;Acc:1314]	22	q13.31	-1	45586219	45636650	10019	-0.447265	3.71469	1.31798	0.250954	0.99989
ENSG00000070413	DGCR2	DiGeorge syndrome critical region gene 2 [Source:HGNC Symbol;Acc:2845]	22	q11.21	-1	19023795	19109967	5596	-0.367974	4.84721	1.31778	0.250991	0.99989
ENSG00000112096	SOD2	superoxide dismutase 2, mitochondrial [Source:HGNC Symbol;Acc:11180]	6	q25.3	-1	160090089	160183561	18985	-0.274217	10.1392	1.31473	0.251539	0.99989
ENSG00000188177	ZC3H6	zinc finger CCCH-type containing 6 [Source:HGNC Symbol;Acc:24762]	2	q13	1	113033171	113097640	11803	0.3009	5.56024	1.31314	0.251826	0.99989
ENSG00000138757	G3BP2	GTPase activating protein (SH3 domain) binding protein 2 [Source:HGNC Symbol;Acc:30291]	4	q21.1	-1	76567966	76649709	7178	-0.214086	8.49453	1.31268	0.25191	0.99989
ENSG00000130475	FCHO1	FCH domain only 1 [Source:HGNC Symbol;Acc:29002]	19	p13.11	1	17858527	17899377	5700	-0.303041	4.99193	1.31256	0.251932	0.99989
ENSG00000114107	CEP70	centrosomal protein 70kDa [Source:HGNC Symbol;Acc:29972]	3	q22.3	-1	138213186	138313380	4421	0.551783	4.53997	1.31189	0.252052	0.99989
ENSG00000103184	SEC14L5	SEC14-like 5 (S. cerevisiae) [Source:HGNC Symbol;Acc:29032]	16	p13.3	1	5008318	5069159	6477	-0.459536	4.64336	1.31163	0.2521	0.99989
ENSG00000105355	PLIN3	perilipin 3 [Source:HGNC Symbol;Acc:16893]	19	p13.3	-1	4838353	4867780	2813	-0.279957	5.73477	1.31149	0.252126	0.99989
ENSG00000151553	FAM160B1	family with sequence similarity 160, member B1 [Source:HGNC Symbol;Acc:29320]	10	q25.3	1	116581503	116659591	6212	0.440842	4.23849	1.31081	0.252249	0.99989
ENSG00000115524	SF3B1	splicing factor 3b, subunit 1, 155kDa [Source:HGNC Symbol;Acc:10768]	2	q33.1	-1	198254508	198299815	9164	0.298475	7.67846	1.3104	0.252321	0.99989
ENSG00000172667	ZMAT3	zinc finger, matrin-type 3 [Source:HGNC Symbol;Acc:29983]	3	q26.32	-1	178735011	178790067	9646	-0.393079	4.46951	1.30818	0.252724	0.99989
ENSG00000153560	UBP1	upstream binding protein 1 (LBP-1a) [Source:HGNC Symbol;Acc:12507]	3	p22.3	-1	33429828	33482863	9760	-0.451926	4.25984	1.30766	0.252819	0.99989
ENSG00000149089	APIP	APAF1 interacting protein [Source:HGNC Symbol;Acc:17581]	11	p13	-1	34874641	34938046	5432	-0.294543	4.26564	1.30692	0.252953	0.99989
ENSG00000188677	PARVB	parvin, beta [Source:HGNC Symbol;Acc:14653]	22	q13.31	1	44395091	44568829	7330	-0.396288	7.36794	1.30614	0.253095	0.99989
ENSG00000180957	PITPNB	phosphatidylinositol transfer protein, beta [Source:HGNC Symbol;Acc:9002]	22	q12.1	-1	28247657	28316122	5091	0.376395	4.62797	1.30552	0.253208	0.99989
ENSG00000101040	ZMYND8	zinc finger, MYND-type containing 8 [Source:HGNC Symbol;Acc:9397]	20	q13.12	-1	45837859	45985567	7684	0.321874	5.8398	1.30487	0.253326	0.99989
ENSG00000164985	PSIP1	PC4 and SFRS1 interacting protein 1 [Source:HGNC Symbol;Acc:9527]	9	p22.3	-1	15464064	15511017	6768	0.189629	7.60925	1.30206	0.253837	0.99989
ENSG00000167986	DDB1	damage-specific DNA binding protein 1, 127kDa [Source:HGNC Symbol;Acc:2717]	11	q12.2	-1	61066923	61110068	13950	-0.435152	5.656	1.29882	0.254428	0.99989
ENSG00000135945	REV1	REV1, polymerase (DNA directed) [Source:HGNC Symbol;Acc:14060]	2	q11.2	-1	100016938	100106497	7769	0.507052	4.14572	1.29878	0.254436	0.99989
ENSG00000100351	GRAP2	GRB2-related adaptor protein 2 [Source:HGNC Symbol;Acc:4563]	22	q13.1	1	40297086	40369725	6190	-0.246426	11.0571	1.29869	0.254452	0.99989
ENSG00000143183	TMCO1	transmembrane and coiled-coil domains 1 [Source:HGNC Symbol;Acc:18188]	1	q24.1	-1	165696032	165796992	3082	0.465539	4.11167	1.29465	0.255194	0.99989
ENSG00000253982			8	p23.3	-1	1710156	1712668	1322	-0.277701	6.03842	1.29275	0.255541	0.99989
ENSG00000095794	CREM	cAMP responsive element modulator [Source:HGNC Symbol;Acc:2352]	10	p11.21	1	35415719	35501886	5695	-0.294461	5.28193	1.29096	0.255871	0.99989
ENSG00000135930	EIF4E2	eukaryotic translation initiation factor 4E family member 2 [Source:HGNC Symbol;Acc:3293]	2	q37.1	1	233414762	233448354	7177	-0.431507	4.28786	1.29013	0.256023	0.99989
ENSG00000124198	ARFGEF2	ADP-ribosylation factor guanine nucleotide-exchange factor 2 (brefeldin A-inhibited) [Source:HGNC Symbol;Acc:15853]	20	q13.13	1	47538427	47653230	8945	0.31061	4.849	1.28956	0.256129	0.99989
ENSG00000168036	CTNNB1	catenin (cadherin-associated protein), beta 1, 88kDa [Source:HGNC Symbol;Acc:2514]	3	p22.1	1	41236328	41301587	6606	0.307402	5.47309	1.28657	0.256681	0.99989
ENSG00000105643	ARRDC2	arrestin domain containing 2 [Source:HGNC Symbol;Acc:25225]	19	p13.11	1	18111941	18124911	4637	0.551298	3.65576	1.28437	0.257088	0.99989
ENSG00000103404	USP31	ubiquitin specific peptidase 31 [Source:HGNC Symbol;Acc:20060]	16	p12.2	-1	23072727	23160591	12211	-0.326478	5.36575	1.2818	0.257565	0.99989
ENSG00000181090	EHMT1	euchromatic histone-lysine N-methyltransferase 1 [Source:HGNC Symbol;Acc:24650]	9	q34.3	1	140513444	140764468	15257	0.468384	4.36677	1.28174	0.257576	0.99989
ENSG00000114738	MAPKAPK3	mitogen-activated protein kinase-activated protein kinase 3 [Source:HGNC Symbol;Acc:6888]	3	p21.2	1	50648951	50686720	3913	-0.335652	5.26878	1.28172	0.257579	0.99989
ENSG00000135837	CEP350	centrosomal protein 350kDa [Source:HGNC Symbol;Acc:24238]	1	q25.2	1	179923873	180084015	14301	0.260118	6.11589	1.27953	0.257986	0.99989
ENSG00000143409	FAM63A	family with sequence similarity 63, member A [Source:HGNC Symbol;Acc:25648]	1	q21.3	-1	150969025	150980851	3590	-0.260541	8.63347	1.27816	0.258241	0.99989
ENSG00000122862	SRGN	serglycin [Source:HGNC Symbol;Acc:9361]	10	q22.1	1	70847862	70864567	1220	-0.245189	8.54302	1.27816	0.258242	0.99989
ENSG00000234456	MAGI2-AS3	MAGI2 antisense RNA 3 [Source:HGNC Symbol;Acc:40862]	7	q21.11	1	79082198	79100524	9849	-0.533871	5.90739	1.27789	0.258292	0.99989
ENSG00000108561	C1QBP	complement component 1, q subcomponent binding protein [Source:HGNC Symbol;Acc:1243]	17	p13.2	-1	5336097	5352150	2335	-0.438371	5.21543	1.277	0.258457	0.99989
ENSG00000154781	CCDC174	coiled-coil domain containing 174 [Source:HGNC Symbol;Acc:28033]	3	p25.1	1	14693271	14714166	3533	0.423328	4.46072	1.27442	0.258939	0.99989
ENSG00000031003	FAM13B	family with sequence similarity 13, member B [Source:HGNC Symbol;Acc:1335]	5	q31.2	-1	137273649	137387650	6808	0.257414	6.34549	1.27192	0.259407	0.99989
ENSG00000104946	TBC1D17	TBC1 domain family, member 17 [Source:HGNC Symbol;Acc:25699]	19	q13.33	1	50380682	50392005	4731	-0.32881	4.45466	1.27184	0.259421	0.99989
ENSG00000154359	LONRF1	LON peptidase N-terminal domain and ring finger 1 [Source:HGNC Symbol;Acc:26302]	8	p23.1	-1	12579403	12613582	5685	0.352367	6.70631	1.27168	0.259451	0.99989
ENSG00000134313	KIDINS220	kinase D-interacting substrate, 220kDa [Source:HGNC Symbol;Acc:29508]	2	p25.1	-1	8865408	8977760	11082	-0.331465	5.7649	1.27134	0.259515	0.99989
ENSG00000128699	ORMDL1	ORM1-like 1 (S. cerevisiae) [Source:HGNC Symbol;Acc:16036]	2	q32.2	-1	190635049	190649097	3958	0.363002	4.24065	1.27091	0.259596	0.99989
ENSG00000196792	STRN3	striatin, calmodulin binding protein 3 [Source:HGNC Symbol;Acc:15720]	14	q12	-1	31363005	31495607	4965	0.35609	6.44522	1.27021	0.259728	0.99989
ENSG00000140943	MBTPS1	membrane-bound transcription factor peptidase, site 1 [Source:HGNC Symbol;Acc:15456]	16	q23.3	-1	84087368	84150511	10226	0.526867	4.34224	1.27001	0.259766	0.99989
ENSG00000198408	MGEA5	meningioma expressed antigen 5 (hyaluronidase) [Source:HGNC Symbol;Acc:7056]	10	q24.32	-1	103544200	103578696	7602	0.265	5.94526	1.26893	0.259968	0.99989
ENSG00000185963	BICD2	bicaudal D homolog 2 (Drosophila) [Source:HGNC Symbol;Acc:17208]	9	q22.31	-1	95473645	95527094	6427	-0.306103	7.80562	1.26704	0.260323	0.99989
ENSG00000162654	GBP4	guanylate binding protein 4 [Source:HGNC Symbol;Acc:20480]	1	p22.2	-1	89646831	89664615	6127	0.374192	4.1866	1.26548	0.260617	0.99989
ENSG00000035403	VCL	vinculin [Source:HGNC Symbol;Acc:12665]	10	q22.2	1	75757872	75879918	5818	-0.32535	12.1083	1.26481	0.260743	0.99989
ENSG00000169247	SH3TC2	SH3 domain and tetratricopeptide repeats 2 [Source:HGNC Symbol;Acc:29427]	5	q32	-1	148303202	148442726	15047	-0.420367	4.70134	1.26398	0.2609	0.99989
ENSG00000146282	RARS2	arginyl-tRNA synthetase 2, mitochondrial [Source:HGNC Symbol;Acc:21406]	6	q15	-1	88224096	88299721	2545	-0.286202	6.05594	1.2639	0.260913	0.99989
ENSG00000130119	GNL3L	guanine nucleotide binding protein-like 3 (nucleolar)-like [Source:HGNC Symbol;Acc:25553]	X	p11.22	1	54556644	54587504	2589	-0.36093	5.17989	1.26342	0.261005	0.99989
ENSG00000143222	UFC1	ubiquitin-fold modifier conjugating enzyme 1 [Source:HGNC Symbol;Acc:26941]	1	q23.3	1	161122566	161128646	2274	0.306037	5.25633	1.26234	0.261208	0.99989
ENSG00000167972	ABCA3	ATP-binding cassette, sub-family A (ABC1), member 3 [Source:HGNC Symbol;Acc:33]	16	p13.3	-1	2325882	2390747	7804	0.330556	5.21126	1.26213	0.261249	0.99989
ENSG00000217027	TPT1P4	tumor protein, translationally-controlled 1 pseudogene 4 [Source:HGNC Symbol;Acc:49298]	6	q24.2	-1	144521584	144522102	519	0.340389	4.42358	1.26138	0.26139	0.99989
ENSG00000182117	NOP10	NOP10 ribonucleoprotein [Source:HGNC Symbol;Acc:14378]	15	q14	-1	34633917	34635378	551	0.323335	4.52019	1.26029	0.261595	0.99989
ENSG00000011260	UTP18	UTP18 small subunit (SSU) processome component homolog (yeast) [Source:HGNC Symbol;Acc:24274]	17	q21.33	1	49337889	49375297	2721	0.282699	5.52116	1.25956	0.261735	0.99989
ENSG00000103194	USP10	ubiquitin specific peptidase 10 [Source:HGNC Symbol;Acc:12608]	16	q24.1	1	84733584	84813528	5083	0.238453	7.30089	1.25944	0.261756	0.99989
ENSG00000198843		Selenoprotein T [Source:UniProtKB/Swiss-Prot;Acc:P62341]	3	q25.1	1	150320662	150348222	4105	-0.231117	8.2266	1.25935	0.261773	0.99989
ENSG00000086504	MRPL28	mitochondrial ribosomal protein L28 [Source:HGNC Symbol;Acc:14484]	16	p13.3	-1	417384	420527	2404	-0.308953	4.86732	1.25401	0.262789	0.99989
ENSG00000089639	GMIP	GEM interacting protein [Source:HGNC Symbol;Acc:24852]	19	p13.11	-1	19740285	19754476	3740	0.278275	5.69183	1.25063	0.263432	0.99989
ENSG00000142186	SCYL1	SCY1-like 1 (S. cerevisiae) [Source:HGNC Symbol;Acc:14372]	11	q13.1	1	65292548	65306175	4282	-0.355887	4.73619	1.25055	0.263448	0.99989
ENSG00000213366	GSTM2	glutathione S-transferase mu 2 (muscle) [Source:HGNC Symbol;Acc:4634]	1	p13.3	1	110210644	110252171	5864	-0.453555	5.22999	1.24974	0.263601	0.99989
ENSG00000166913	YWHAB	tyrosine 3-monooxygenase/tryptophan 5-monooxygenase activation protein, beta [Source:HGNC Symbol;Acc:12849]	20	q13.12	1	43514317	43537173	4017	-0.20857	7.94694	1.24969	0.263611	0.99989
ENSG00000134882	UBAC2	UBA domain containing 2 [Source:HGNC Symbol;Acc:20486]	13	q32.3	1	99853028	100038688	4519	-0.234697	7.66588	1.24969	0.263612	0.99989
ENSG00000080345	RIF1	RAP1 interacting factor homolog (yeast) [Source:HGNC Symbol;Acc:23207]	2	q23.3	1	152266397	152364527	18166	-0.433255	4.97303	1.24928	0.26369	0.99989
ENSG00000112200	ZNF451	zinc finger protein 451 [Source:HGNC Symbol;Acc:21091]	6	p12.1	1	56951642	57035105	16416	0.338117	4.92794	1.24457	0.264591	0.99989
ENSG00000100227	POLDIP3	polymerase (DNA-directed), delta interacting protein 3 [Source:HGNC Symbol;Acc:23782]	22	q13.2	-1	42979727	43010968	3650	-0.452422	3.75227	1.24246	0.264997	0.99989
ENSG00000119242	CCDC92	coiled-coil domain containing 92 [Source:HGNC Symbol;Acc:29563]	12	q24.31	-1	124403207	124457378	6366	-0.273353	8.92539	1.24217	0.265054	0.99989
ENSG00000257923	CUX1	cut-like homeobox 1 [Source:HGNC Symbol;Acc:2557]	7	q22.1	1	101458959	101927249	18329	-0.264858	8.20763	1.24204	0.265077	0.99989
ENSG00000159658	EFCAB14	EF-hand calcium binding domain 14 [Source:HGNC Symbol;Acc:29051]	1	p33	-1	47124366	47184824	6526	-0.27605	6.22811	1.24068	0.26534	0.99989
ENSG00000198087	CD2AP	CD2-associated protein [Source:HGNC Symbol;Acc:14258]	6	p12.3	1	47445525	47594999	6751	0.312432	5.76781	1.23907	0.26565	0.99989
ENSG00000156206	C15orf26	chromosome 15 open reading frame 26 [Source:HGNC Symbol;Acc:26782]	15	q25.1	1	81299374	81441516	1979	-0.279466	7.73386	1.23596	0.266252	0.99989
ENSG00000030066	NUP160	nucleoporin 160kDa [Source:HGNC Symbol;Acc:18017]	11	p11.2	-1	47799639	47870107	8471	-0.575081	4.2233	1.23586	0.266271	0.99989
ENSG00000136824	SMC2	structural maintenance of chromosomes 2 [Source:HGNC Symbol;Acc:14011]	9	q31.1	1	106856541	106903698	6466	0.424784	4.33969	1.23553	0.266335	0.99989
ENSG00000055609	KMT2C	lysine (K)-specific methyltransferase 2C [Source:HGNC Symbol;Acc:13726]	7	q36.1	-1	151832010	152133090	22650	0.238075	7.57009	1.23433	0.266567	0.99989
ENSG00000149131	SERPING1	serpin peptidase inhibitor, clade G (C1 inhibitor), member 1 [Source:HGNC Symbol;Acc:1228]	11	q12.1	1	57364860	57382326	3603	0.584444	5.39722	1.23416	0.2666	0.99989
ENSG00000132485	ZRANB2	zinc finger, RAN-binding domain containing 2 [Source:HGNC Symbol;Acc:13058]	1	p31.1	-1	71528974	71546980	4993	0.424966	5.16331	1.23038	0.267334	0.99989
ENSG00000105339	DENND3	DENN/MADD domain containing 3 [Source:HGNC Symbol;Acc:29134]	8	q24.3	1	142127377	142205907	14670	-0.31203	5.39854	1.22906	0.26759	0.99989
ENSG00000073009	IKBKG	inhibitor of kappa light polypeptide gene enhancer in B-cells, kinase gamma [Source:HGNC Symbol;Acc:5961]	X	q28	1	153769414	153796782	7462	-0.298722	4.79709	1.22873	0.267654	0.99989
ENSG00000233927	RPS28	ribosomal protein S28 [Source:HGNC Symbol;Acc:10418]	19	p13.2	1	8386042	8388224	2119	0.303246	7.5473	1.22416	0.268545	0.99989
ENSG00000164096	C4orf3	chromosome 4 open reading frame 3 [Source:HGNC Symbol;Acc:19225]	4	q26	-1	120218207	120225600	2515	-0.248289	7.86597	1.22357	0.268661	0.99989
ENSG00000156411	C14orf2	chromosome 14 open reading frame 2 [Source:HGNC Symbol;Acc:1188]	14	q32.33	-1	104378625	104394606	3415	0.24254	6.61878	1.22216	0.268938	0.99989
ENSG00000187231	SESTD1	SEC14 and spectrin domains 1 [Source:HGNC Symbol;Acc:18379]	2	q31.2	-1	179966419	180129517	11349	-0.265356	7.70014	1.22064	0.269235	0.99989
ENSG00000196396	PTPN1	protein tyrosine phosphatase, non-receptor type 1 [Source:HGNC Symbol;Acc:9642]	20	q13.13	1	49126891	49201299	3529	0.230278	4.66443	1.22028	0.269307	0.99989
ENSG00000081377	CDC14B	cell division cycle 14B [Source:HGNC Symbol;Acc:1719]	9	q22.33	-1	99252523	99382112	10457	-0.271752	8.65479	1.21494	0.270355	0.99989
ENSG00000180376	CCDC66	coiled-coil domain containing 66 [Source:HGNC Symbol;Acc:27709]	3	p14.3	1	56591189	56655846	9278	0.318216	4.87788	1.21429	0.270485	0.99989
ENSG00000129691	ASH2L	ash2 (absent, small, or homeotic)-like (Drosophila) [Source:HGNC Symbol;Acc:744]	8	p11.23	1	37962760	38001594	5795	-0.252175	6.57172	1.21361	0.270618	0.99989
ENSG00000126756	UXT	ubiquitously-expressed, prefoldin-like chaperone [Source:HGNC Symbol;Acc:12641]	X	p11.23	-1	47511197	47518560	1243	0.220598	6.63492	1.20832	0.271665	0.99989
ENSG00000185864	NPIPB4	nuclear pore complex interacting protein family, member B4 [Source:HGNC Symbol;Acc:41985]	16	p12.2	-1	21845890	21892148	7408	0.400175	4.13751	1.20745	0.271837	0.99989
ENSG00000170248	PDCD6IP	programmed cell death 6 interacting protein [Source:HGNC Symbol;Acc:8766]	3	p22.3	1	33839844	33911194	9033	-0.380454	5.50803	1.20628	0.27207	0.99989
ENSG00000009335	UBE3C	ubiquitin protein ligase E3C [Source:HGNC Symbol;Acc:16803]	7	q36.3	1	156931607	157062066	9218	-0.44132	4.61532	1.20542	0.27224	0.99989
ENSG00000078369	GNB1	guanine nucleotide binding protein (G protein), beta polypeptide 1 [Source:HGNC Symbol;Acc:4396]	1	p36.33	-1	1716729	1822495	6351	-0.199204	8.31966	1.20397	0.272529	0.99989
ENSG00000089351	GRAMD1A	GRAM domain containing 1A [Source:HGNC Symbol;Acc:29305]	19	q13.11	1	35485688	35517375	5942	-0.246641	5.60642	1.20397	0.27253	0.99989
ENSG00000239900	ADSL	adenylosuccinate lyase [Source:HGNC Symbol;Acc:291]	22	q13.1	1	40742507	40786467	6021	-0.36441	4.78477	1.20341	0.272642	0.99989
ENSG00000189079	ARID2	AT rich interactive domain 2 (ARID, RFX-like) [Source:HGNC Symbol;Acc:18037]	12	q12	1	46123448	46301823	12127	-0.308046	4.92402	1.20323	0.272676	0.99989
ENSG00000168958	MFF	mitochondrial fission factor [Source:HGNC Symbol;Acc:24858]	2	q36.3	1	228189867	228222550	6162	-0.225106	7.7536	1.20172	0.272978	0.99989
ENSG00000182372	CLN8	ceroid-lipofuscinosis, neuronal 8 (epilepsy, progressive with mental retardation) [Source:HGNC Symbol;Acc:2079]	8	p23.3	1	1703944	1734738	8111	-0.449615	4.32153	1.19729	0.273864	0.99989
ENSG00000111678	C12orf57	chromosome 12 open reading frame 57 [Source:HGNC Symbol;Acc:29521]	12	p13.31	1	7052141	7055166	1806	-0.292518	4.47227	1.19716	0.273889	0.99989
ENSG00000114982	KANSL3	KAT8 regulatory NSL complex subunit 3 [Source:HGNC Symbol;Acc:25473]	2	q11.2	-1	97258907	97308524	9015	-0.269913	6.33608	1.19647	0.274029	0.99989
ENSG00000242802	AP5Z1	adaptor-related protein complex 5, zeta 1 subunit [Source:HGNC Symbol;Acc:22197]	7	p22.1	1	4815253	4833943	6873	0.477257	3.69869	1.19558	0.274207	0.99989
ENSG00000060558	GNA15	guanine nucleotide binding protein (G protein), alpha 15 (Gq class) [Source:HGNC Symbol;Acc:4383]	19	p13.3	1	3136191	3163767	2613	-0.308724	5.69533	1.19383	0.274559	0.99989
ENSG00000128708	HAT1	histone acetyltransferase 1 [Source:HGNC Symbol;Acc:4821]	2	q31.1	1	172778958	172848599	6792	0.230316	7.00602	1.19332	0.274661	0.99989
ENSG00000168394	TAP1	transporter 1, ATP-binding cassette, sub-family B (MDR/TAP) [Source:HGNC Symbol;Acc:43]	6	p21.32	-1	32812986	32821755	4742	0.372315	5.55801	1.19297	0.274732	0.99989
ENSG00000159176	CSRP1	cysteine and glycine-rich protein 1 [Source:HGNC Symbol;Acc:2469]	1	q32.1	-1	201452658	201478584	10318	-0.366862	4.4656	1.19198	0.27493	0.99989
ENSG00000196655	TRAPPC4	trafficking protein particle complex 4 [Source:HGNC Symbol;Acc:19943]	11	q23.3	1	118889142	118896164	5140	0.283397	4.33602	1.19048	0.275233	0.99989
ENSG00000136147	PHF11	PHD finger protein 11 [Source:HGNC Symbol;Acc:17024]	13	q14.2	1	50069746	50103123	4841	0.316487	4.90509	1.18808	0.275717	0.99989
ENSG00000138594	TMOD3	tropomodulin 3 (ubiquitous) [Source:HGNC Symbol;Acc:11873]	15	q21.2	1	52121825	52239492	7045	0.209635	8.13232	1.18748	0.275839	0.99989
ENSG00000169925	BRD3	bromodomain containing 3 [Source:HGNC Symbol;Acc:1104]	9	q34.2	-1	136895427	136933657	6876	-0.246777	6.83667	1.18728	0.275879	0.99989
ENSG00000131724	IL13RA1	interleukin 13 receptor, alpha 1 [Source:HGNC Symbol;Acc:5974]	X	q24	1	117861535	117928502	5387	-0.945408	3.51978	1.18549	0.27624	0.99989
ENSG00000105486	LIG1	ligase I, DNA, ATP-dependent [Source:HGNC Symbol;Acc:6598]	19	q13.33	-1	48618702	48673860	6572	0.308545	4.49378	1.18377	0.27659	0.99989
ENSG00000249307	LINC01088	long intergenic non-protein coding RNA 1088 [Source:HGNC Symbol;Acc:49148]	4	q21.21	1	79892902	80229952	3995	0.422601	5.49893	1.18364	0.276616	0.99989
ENSG00000168056	LTBP3	latent transforming growth factor beta binding protein 3 [Source:HGNC Symbol;Acc:6716]	11	q13.1	-1	65306276	65326401	10298	0.570693	3.90739	1.18313	0.27672	0.99989
ENSG00000113845	TIMMDC1	translocase of inner mitochondrial membrane domain containing 1 [Source:HGNC Symbol;Acc:1321]	3	q13.33	1	119217379	119243937	2730	0.293111	4.56623	1.18279	0.276789	0.99989
ENSG00000081181	ARG2	arginase 2 [Source:HGNC Symbol;Acc:664]	14	q24.1	1	68086515	68118437	2418	-0.367995	5.3312	1.18142	0.277068	0.99989
ENSG00000101940	WDR13	WD repeat domain 13 [Source:HGNC Symbol;Acc:14352]	X	p11.23	1	48448430	48463581	4210	-0.220422	6.8223	1.18125	0.277102	0.99989
ENSG00000100578	KIAA0586	KIAA0586 [Source:HGNC Symbol;Acc:19960]	14	q23.1	1	58894103	59015216	7393	0.417396	3.91833	1.1805	0.277255	0.99989
ENSG00000198730	CTR9	CTR9, Paf1/RNA polymerase II complex component [Source:HGNC Symbol;Acc:16850]	11	p15.3	1	10772534	10801290	5562	0.227478	7.49796	1.18024	0.277307	0.99989
ENSG00000108294	PSMB3	proteasome (prosome, macropain) subunit, beta type, 3 [Source:HGNC Symbol;Acc:9540]	17	q12	1	36908989	36920484	1179	-0.290158	6.17931	1.17801	0.277762	0.99989
ENSG00000163902	RPN1	ribophorin I [Source:HGNC Symbol;Acc:10381]	3	q21.3	-1	128338817	128399918	3988	-0.209949	6.68068	1.17476	0.278425	0.99989
ENSG00000104897	SF3A2	splicing factor 3a, subunit 2, 66kDa [Source:HGNC Symbol;Acc:10766]	19	p13.3	1	2236520	2248678	3131	-0.31329	5.20844	1.17225	0.278939	0.99989
ENSG00000172794	RAB37	RAB37, member RAS oncogene family [Source:HGNC Symbol;Acc:30268]	17	q25.1	1	72666717	72743474	5074	-0.252517	8.91982	1.17176	0.279039	0.99989
ENSG00000076944	STXBP2	syntaxin binding protein 2 [Source:HGNC Symbol;Acc:11445]	19	p13.2	1	7701767	7712759	5301	-0.218307	8.67664	1.17033	0.279333	0.99989
ENSG00000102144	PGK1	phosphoglycerate kinase 1 [Source:HGNC Symbol;Acc:8896]	X	q21.1	1	77320685	77384793	5725	-0.197637	8.53146	1.16894	0.279619	0.99989
ENSG00000078674	PCM1	pericentriolar material 1 [Source:HGNC Symbol;Acc:8727]	8	p22	1	17780349	17885478	12470	0.274194	6.5252	1.16886	0.279635	0.99989
ENSG00000092330	TINF2	TERF1 (TRF1)-interacting nuclear factor 2 [Source:HGNC Symbol;Acc:11824]	14	q12	-1	24708849	24711880	2712	-0.288274	4.78796	1.16862	0.279685	0.99989
ENSG00000204424	LY6G6F	lymphocyte antigen 6 complex, locus G6F [Source:HGNC Symbol;Acc:13933]	6	p21.33	1	31674640	31685581	1289	-0.269602	6.12966	1.16748	0.279919	0.99989
ENSG00000113575	PPP2CA	protein phosphatase 2, catalytic subunit, alpha isozyme [Source:HGNC Symbol;Acc:9299]	5	q31.1	-1	133530025	133561833	5661	-0.247972	5.54737	1.16648	0.280126	0.99989
ENSG00000116288	PARK7	parkinson protein 7 [Source:HGNC Symbol;Acc:16369]	1	p36.23	1	8014351	8045565	2397	-0.249294	9.94151	1.16487	0.280459	0.99989
ENSG00000118363	SPCS2	signal peptidase complex subunit 2 homolog (S. cerevisiae) [Source:HGNC Symbol;Acc:28962]	11	q13.4	1	74660292	74690076	2979	0.298934	5.00002	1.16449	0.280537	0.99989
ENSG00000005810	MYCBP2	MYC binding protein 2, E3 ubiquitin protein ligase [Source:HGNC Symbol;Acc:23386]	13	q22.3	-1	77618792	77901185	15943	0.208841	6.83565	1.15932	0.281607	0.99989
ENSG00000148484	RSU1	Ras suppressor protein 1 [Source:HGNC Symbol;Acc:10464]	10	p13	-1	16632610	16859527	4191	-0.362638	11.636	1.15892	0.281689	0.99989
ENSG00000174099	MSRB3	methionine sulfoxide reductase B3 [Source:HGNC Symbol;Acc:27375]	12	q14.3	1	65672423	65882024	5791	-0.330532	6.65147	1.15882	0.28171	0.99989
ENSG00000138398	PPIG	peptidylprolyl isomerase G (cyclophilin G) [Source:HGNC Symbol;Acc:14650]	2	q31.1	1	170440850	170497916	7368	0.314357	5.84194	1.15764	0.281956	0.99989
ENSG00000106245	BUD31	BUD31 homolog (S. cerevisiae) [Source:HGNC Symbol;Acc:29629]	7	q22.1	1	99006264	99017239	2381	0.25866	5.29501	1.15644	0.282205	0.99989
ENSG00000150459	SAP18	Sin3A-associated protein, 18kDa [Source:HGNC Symbol;Acc:10530]	13	q12.11	1	21714653	21723221	3394	0.211973	6.49643	1.15449	0.282611	0.99989
ENSG00000129071	MBD4	methyl-CpG binding domain protein 4 [Source:HGNC Symbol;Acc:6919]	3	q21.3	-1	129149787	129158878	3212	-0.259572	5.19567	1.15435	0.282641	0.99989
ENSG00000105971	CAV2	caveolin 2 [Source:HGNC Symbol;Acc:1528]	7	q31.2	1	115927434	116148595	6640	0.447069	5.86499	1.1539	0.282734	0.99989
ENSG00000156467	UQCRB	ubiquinol-cytochrome c reductase binding protein [Source:HGNC Symbol;Acc:12582]	8	q22.1	-1	97238148	97247862	9715	0.223875	6.28537	1.15359	0.282799	0.99989
ENSG00000188612	SUMO2	small ubiquitin-like modifier 2 [Source:HGNC Symbol;Acc:11125]	17	q25.1	-1	73163408	73179078	1645	-0.18879	7.21414	1.1501	0.283529	0.99989
ENSG00000109113	RAB34	RAB34, member RAS oncogene family [Source:HGNC Symbol;Acc:16519]	17	q11.2	-1	27041299	27045447	3328	-0.366911	4.42264	1.14964	0.283624	0.99989
ENSG00000182446	NPLOC4	nuclear protein localization 4 homolog (S. cerevisiae) [Source:HGNC Symbol;Acc:18261]	17	q25.3	-1	79523913	79615495	9562	-0.32141	5.11889	1.1492	0.283716	0.99989
ENSG00000083642	PDS5B	PDS5, regulator of cohesion maintenance, homolog B (S. cerevisiae) [Source:HGNC Symbol;Acc:20418]	13	q13.1	1	33160564	33352157	13212	0.30565	6.20774	1.14895	0.283768	0.99989
ENSG00000151422	FER	fer (fps/fes related) tyrosine kinase [Source:HGNC Symbol;Acc:3655]	5	q21.3	1	108083523	108532542	13593	0.303821	5.54516	1.14766	0.28404	0.99989
ENSG00000236397	DDX11L2	DEAD/H (Asp-Glu-Ala-Asp/His) box helicase 11 like 2 [Source:HGNC Symbol;Acc:37103]	2	q13	-1	114356606	114359144	1757	-0.356172	5.09006	1.14405	0.284799	0.99989
ENSG00000122417	ODF2L	outer dense fiber of sperm tails 2-like [Source:HGNC Symbol;Acc:29225]	1	p22.3	-1	86814344	86862023	9059	-0.332466	4.78691	1.14134	0.285369	0.99989
ENSG00000084676	NCOA1	nuclear receptor coactivator 1 [Source:HGNC Symbol;Acc:7668]	2	p23.3	1	24714783	24993571	8633	0.20829	7.54489	1.14054	0.285539	0.99989
ENSG00000149564	ESAM	endothelial cell adhesion molecule [Source:HGNC Symbol;Acc:17474]	11	q24.2	-1	124622026	124632186	3373	-0.222799	9.85187	1.13978	0.285698	0.99989
ENSG00000166171	DPCD	deleted in primary ciliary dyskinesia homolog (mouse) [Source:HGNC Symbol;Acc:24542]	10	q24.32	1	103330317	103369425	2670	-0.267286	5.47397	1.13913	0.285835	0.99989
ENSG00000168291	PDHB	pyruvate dehydrogenase (lipoamide) beta [Source:HGNC Symbol;Acc:8808]	3	p14.3	-1	58413357	58419584	4717	-0.23907	4.75203	1.13882	0.285902	0.99989
ENSG00000170266	GLB1	galactosidase, beta 1 [Source:HGNC Symbol;Acc:4298]	3	p22.3	-1	33038100	33138722	4364	-0.365783	5.39183	1.13678	0.286333	0.99989
ENSG00000143624	INTS3	integrator complex subunit 3 [Source:HGNC Symbol;Acc:26153]	1	q21.3	1	153700543	153746555	9721	0.723615	3.92405	1.13623	0.286449	0.99989
ENSG00000122223	CD244	CD244 molecule, natural killer cell receptor 2B4 [Source:HGNC Symbol;Acc:18171]	1	q23.3	-1	160799950	160832692	2904	-0.413937	4.2224	1.13569	0.286565	0.99989
ENSG00000005249	PRKAR2B	protein kinase, cAMP-dependent, regulatory, type II, beta [Source:HGNC Symbol;Acc:9392]	7	q22.3	1	106685094	106802256	4318	-0.232927	12.5356	1.13533	0.286641	0.99989
ENSG00000254810			11	q13.5	-1	76365213	76367756	651	-0.410938	4.80877	1.13533	0.286642	0.99989
ENSG00000132842	AP3B1	adaptor-related protein complex 3, beta 1 subunit [Source:HGNC Symbol;Acc:566]	5	q14.1	-1	77296349	77590579	7310	0.31443	5.8358	1.13458	0.2868	0.99989
ENSG00000131876	SNRPA1	small nuclear ribonucleoprotein polypeptide A' [Source:HGNC Symbol;Acc:11152]	15	q26.3	-1	101821715	101835487	3669	0.467571	4.33954	1.13418	0.286885	0.99989
ENSG00000020633	RUNX3	runt-related transcription factor 3 [Source:HGNC Symbol;Acc:10473]	1	p36.11	-1	25226002	25291612	4605	-0.539188	3.67658	1.13398	0.286928	0.99989
ENSG00000042062	FAM65C	family with sequence similarity 65, member C [Source:HGNC Symbol;Acc:16168]	20	q13.13	-1	49202645	49308065	6009	0.321985	4.25393	1.13386	0.286953	0.99989
ENSG00000172375	C2CD2L	C2CD2-like [Source:HGNC Symbol;Acc:29000]	11	q23.3	1	118972908	118989252	9214	-0.362008	4.00406	1.13249	0.287244	0.99989
ENSG00000161204	ABCF3	ATP-binding cassette, sub-family F (GCN20), member 3 [Source:HGNC Symbol;Acc:72]	3	q27.1	1	183903811	183911800	5207	-0.590325	4.03775	1.13234	0.287277	0.99989
ENSG00000092201	SUPT16H	suppressor of Ty 16 homolog (S. cerevisiae) [Source:HGNC Symbol;Acc:11465]	14	q11.2	-1	21819631	21852425	7151	0.298371	5.6156	1.1309	0.287583	0.99989
ENSG00000127252	HRASLS	HRAS-like suppressor [Source:HGNC Symbol;Acc:14922]	3	q29	1	192958914	192995527	1169	-0.294921	6.66452	1.13062	0.287643	0.99989
ENSG00000133243	BTBD2	BTB (POZ) domain containing 2 [Source:HGNC Symbol;Acc:15504]	19	p13.3	-1	1985447	2034880	5505	-0.348278	4.56557	1.13038	0.287695	0.99989
ENSG00000174547	MRPL11	mitochondrial ribosomal protein L11 [Source:HGNC Symbol;Acc:14042]	11	q13.2	-1	66202546	66234209	2539	0.420034	3.73327	1.13028	0.287716	0.99989
ENSG00000120915	EPHX2	epoxide hydrolase 2, cytoplasmic [Source:HGNC Symbol;Acc:3402]	8	p21.2	1	27348296	27403081	4473	-0.403957	5.09729	1.12821	0.288157	0.99989
ENSG00000148248	SURF4	surfeit 4 [Source:HGNC Symbol;Acc:11476]	9	q34.2	-1	136228325	136242970	3229	-0.322815	4.26721	1.12703	0.288409	0.99989
ENSG00000122299	ZC3H7A	zinc finger CCCH-type containing 7A [Source:HGNC Symbol;Acc:30959]	16	p13.13	-1	11844442	11891123	7076	-0.171895	7.46371	1.12701	0.288414	0.99989
ENSG00000198001	IRAK4	interleukin-1 receptor-associated kinase 4 [Source:HGNC Symbol;Acc:17967]	12	q12	1	44152747	44183346	5629	0.270113	5.53659	1.12563	0.288709	0.99989
ENSG00000147804	SLC39A4	solute carrier family 39 (zinc transporter), member 4 [Source:HGNC Symbol;Acc:17129]	8	q24.3	-1	145635126	145642279	5033	-0.281368	4.59217	1.12546	0.288746	0.99989
ENSG00000156787	TBC1D31	TBC1 domain family, member 31 [Source:HGNC Symbol;Acc:30888]	8	q24.13	1	124054208	124164393	8611	-0.387455	4.39181	1.12506	0.288832	0.99989
ENSG00000138434	SSFA2	sperm specific antigen 2 [Source:HGNC Symbol;Acc:11319]	2	q31.3	1	182756560	182795465	9582	0.264206	7.13549	1.12491	0.288864	0.99989
ENSG00000171552	BCL2L1	BCL2-like 1 [Source:HGNC Symbol;Acc:992]	20	q11.21	-1	30252255	30311792	3314	-0.259926	5.8745	1.124	0.289059	0.99989
ENSG00000239713	APOBEC3G	apolipoprotein B mRNA editing enzyme, catalytic polypeptide-like 3G [Source:HGNC Symbol;Acc:17357]	22	q13.1	1	39436924	39483748	5496	-0.359234	5.32242	1.12366	0.289131	0.99989
ENSG00000044115	CTNNA1	catenin (cadherin-associated protein), alpha 1, 102kDa [Source:HGNC Symbol;Acc:2509]	5	q31.2	1	137946656	138270723	8830	-0.235906	6.36486	1.12269	0.289341	0.99989
ENSG00000234231			2	p11.2	1	88000503	88038766	2328	-0.320812	5.02688	1.12246	0.289389	0.99989
ENSG00000162244	RPL29	ribosomal protein L29 [Source:HGNC Symbol;Acc:10331]	3	p21.2	-1	52027616	52029958	1912	0.32548	5.6846	1.11782	0.290389	0.99989
ENSG00000173264	GPR137	G protein-coupled receptor 137 [Source:HGNC Symbol;Acc:24300]	11	q13.1	1	64037534	64056972	4031	-0.330998	4.9871	1.1164	0.290695	0.99989
ENSG00000138107	ACTR1A	ARP1 actin-related protein 1 homolog A, centractin alpha (yeast) [Source:HGNC Symbol;Acc:167]	10	q24.32	-1	104238986	104262482	4341	-0.228775	5.15041	1.11218	0.291609	0.99989
ENSG00000137449	CPEB2	cytoplasmic polyadenylation element binding protein 2 [Source:HGNC Symbol;Acc:21745]	4	p15.33	1	15004298	15071777	7177	-0.352281	4.53886	1.11201	0.291645	0.99989
ENSG00000132912	DCTN4	dynactin 4 (p62) [Source:HGNC Symbol;Acc:15518]	5	q33.1	-1	150088002	150138671	6417	0.301637	5.24403	1.11122	0.291817	0.99989
ENSG00000162777	DENND2D	DENN/MADD domain containing 2D [Source:HGNC Symbol;Acc:26192]	1	p13.3	-1	111729796	111747157	5515	0.241596	5.80666	1.11113	0.291835	0.99989
ENSG00000157837	SPPL3	signal peptide peptidase like 3 [Source:HGNC Symbol;Acc:30424]	12	q24.31	-1	121200313	121342174	6672	-0.214878	8.55026	1.10931	0.292232	0.99989
ENSG00000166595	FAM96B	family with sequence similarity 96, member B [Source:HGNC Symbol;Acc:24261]	16	q22.1	-1	66965959	66968326	1069	0.225344	5.05875	1.1079	0.292538	0.99989
ENSG00000134548	C12orf39	chromosome 12 open reading frame 39 [Source:HGNC Symbol;Acc:28139]	12	p12.1	1	21679241	21690311	2935	-0.282427	7.35338	1.10623	0.292903	0.99989
ENSG00000138964	PARVG	parvin, gamma [Source:HGNC Symbol;Acc:14654]	22	q13.31	1	44568836	44615413	8677	0.352968	6.08416	1.10586	0.292983	0.99989
ENSG00000070061	IKBKAP	inhibitor of kappa light polypeptide gene enhancer in B-cells, kinase complex-associated protein [Source:HGNC Symbol;Acc:5959]	9	q31.3	-1	111629797	111696396	6048	-0.582144	3.67943	1.10565	0.29303	0.99989
ENSG00000112234	FBXL4	F-box and leucine-rich repeat protein 4 [Source:HGNC Symbol;Acc:13601]	6	q16.1	-1	99316420	99395849	8076	-0.389008	5.48494	1.10458	0.293263	0.99989
ENSG00000101079	NDRG3	NDRG family member 3 [Source:HGNC Symbol;Acc:14462]	20	q11.23	-1	35280169	35374481	3248	-0.323014	5.23629	1.10128	0.293986	0.99989
ENSG00000185324	CDK10	cyclin-dependent kinase 10 [Source:HGNC Symbol;Acc:1770]	16	q24.3	1	89747145	89762772	6791	0.576319	3.68709	1.10124	0.293993	0.99989
ENSG00000005955	GGNBP2	gametogenetin binding protein 2 [Source:HGNC Symbol;Acc:19357]	17	q12	1	34900737	34946278	9729	0.294587	6.04186	1.10113	0.294017	0.99989
ENSG00000102096	PIM2	pim-2 oncogene [Source:HGNC Symbol;Acc:8987]	X	p11.23	-1	48770459	48776301	2761	0.39164	4.79502	1.0986	0.294574	0.99989
ENSG00000169220	RGS14	regulator of G-protein signaling 14 [Source:HGNC Symbol;Acc:9996]	5	q35.3	1	176784838	176799602	3797	0.512763	4.35669	1.09777	0.294757	0.99989
ENSG00000142676	RPL11	ribosomal protein L11 [Source:HGNC Symbol;Acc:10301]	1	p36.11	1	24018269	24022915	1987	0.296299	8.85363	1.0952	0.295322	0.99989
ENSG00000123143	PKN1	protein kinase N1 [Source:HGNC Symbol;Acc:9405]	19	p13.12	1	14543865	14582679	4606	-0.313442	5.58536	1.09475	0.29542	0.99989
ENSG00000081189	MEF2C	myocyte enhancer factor 2C [Source:HGNC Symbol;Acc:6996]	5	q14.3	-1	88013975	88199922	9053	0.190592	7.63552	1.09122	0.296202	0.99989
ENSG00000111335	OAS2	2'-5'-oligoadenylate synthetase 2, 69/71kDa [Source:HGNC Symbol;Acc:8087]	12	q24.13	1	113416200	113449528	6264	0.488927	3.54573	1.09114	0.296218	0.99989
ENSG00000145687	SSBP2	single-stranded DNA binding protein 2 [Source:HGNC Symbol;Acc:15831]	5	q14.1	-1	80708840	81047616	11284	-0.218739	7.38552	1.08771	0.296979	0.99989
ENSG00000162923	WDR26	WD repeat domain 26 [Source:HGNC Symbol;Acc:21208]	1	q42.12	-1	224572845	224624735	10481	-0.222511	6.75278	1.0877	0.296982	0.99989
ENSG00000161911	TREML1	triggering receptor expressed on myeloid cells-like 1 [Source:HGNC Symbol;Acc:20434]	6	p21.1	-1	41117080	41122075	1483	-0.24798	10.5634	1.08731	0.297068	0.99989
ENSG00000109390	NDUFC1	NADH dehydrogenase (ubiquinone) 1, subcomplex unknown, 1, 6kDa [Source:HGNC Symbol;Acc:7705]	4	q31.1	-1	140188034	140223705	1941	0.203027	6.16295	1.08706	0.297123	0.99989
ENSG00000083896	YTHDC1	YTH domain containing 1 [Source:HGNC Symbol;Acc:30626]	4	q13.2	-1	69176105	69215807	7032	0.426445	4.25647	1.08635	0.297282	0.99989
ENSG00000141385	AFG3L2	AFG3-like AAA ATPase 2 [Source:HGNC Symbol;Acc:315]	18	p11.21	-1	12328943	12377313	6624	0.475438	3.96048	1.08496	0.297591	0.99989
ENSG00000138041	SMEK2	SMEK homolog 2, suppressor of mek1 (Dictyostelium) [Source:HGNC Symbol;Acc:29267]	2	p16.1	-1	55774428	55846015	8216	0.199122	6.91244	1.08443	0.297708	0.99989
ENSG00000153147	SMARCA5	SWI/SNF related, matrix associated, actin dependent regulator of chromatin, subfamily a, member 5 [Source:HGNC Symbol;Acc:11101]	4	q31.21	1	144434616	144478639	8385	0.30322	7.75167	1.08429	0.297739	0.99989
ENSG00000138382	METTL5	methyltransferase like 5 [Source:HGNC Symbol;Acc:25006]	2	q31.1	-1	170666591	170681441	2865	-0.409109	3.84226	1.0833	0.29796	0.99989
ENSG00000198252	STYX	serine/threonine/tyrosine interacting protein [Source:HGNC Symbol;Acc:11447]	14	q22.1	1	53196898	53241716	4978	-0.407514	3.96419	1.08182	0.298292	0.99989
ENSG00000055211	GINM1	glycoprotein integral membrane 1 [Source:HGNC Symbol;Acc:21074]	6	q25.1	1	149887430	149912884	2248	0.220037	4.8023	1.08128	0.298411	0.99989
ENSG00000131408	NR1H2	nuclear receptor subfamily 1, group H, member 2 [Source:HGNC Symbol;Acc:7965]	19	q13.33	1	50832910	50886239	3753	-0.219037	6.44753	1.07704	0.29936	0.99989
ENSG00000173992	CCS	copper chaperone for superoxide dismutase [Source:HGNC Symbol;Acc:1613]	11	q13.2	1	66360292	66373490	2474	-0.34217	5.79007	1.07607	0.299579	0.99989
ENSG00000134352	IL6ST	interleukin 6 signal transducer (gp130, oncostatin M receptor) [Source:HGNC Symbol;Acc:6021]	5	q11.2	-1	55230923	55290821	9292	0.255841	7.79041	1.07424	0.29999	0.99989
ENSG00000100241	SBF1	SET binding factor 1 [Source:HGNC Symbol;Acc:10542]	22	q13.33	-1	50883429	50913454	9442	-0.448012	4.06653	1.07362	0.30013	0.99989
ENSG00000100296	THOC5	THO complex 5 [Source:HGNC Symbol;Acc:19074]	22	q12.2	-1	29901868	29951205	7878	-0.427733	4.79978	1.0736	0.300134	0.99989
ENSG00000197728	RPS26	ribosomal protein S26 [Source:HGNC Symbol;Acc:10414]	12	q13.2	1	56435637	56438116	1600	0.280744	7.48949	1.06858	0.301266	0.99989
ENSG00000093010	COMT	catechol-O-methyltransferase [Source:HGNC Symbol;Acc:2228]	22	q11.21	1	19929130	19957498	5195	-0.240105	4.74945	1.06774	0.301455	0.99989
ENSG00000108622	ICAM2	intercellular adhesion molecule 2 [Source:HGNC Symbol;Acc:5345]	17	q23.3	-1	62079954	62097994	3243	0.237688	5.51068	1.06666	0.301701	0.99989
ENSG00000130748	TMEM160	transmembrane protein 160 [Source:HGNC Symbol;Acc:26042]	19	q13.32	-1	47549165	47551888	663	-0.35917	4.06813	1.06651	0.301735	0.99989
ENSG00000054523	KIF1B	kinesin family member 1B [Source:HGNC Symbol;Acc:16636]	1	p36.22	1	10270863	10441661	17693	0.38048	4.92677	1.06601	0.301848	0.99989
ENSG00000100075	SLC25A1	solute carrier family 25 (mitochondrial carrier; citrate transporter), member 1 [Source:HGNC Symbol;Acc:10979]	22	q11.21	-1	19163095	19166343	2089	-0.270213	4.91462	1.06535	0.301999	0.99989
ENSG00000114127	XRN1	5'-3' exoribonuclease 1 [Source:HGNC Symbol;Acc:30654]	3	q23	-1	142025449	142166904	11982	0.22833	7.11149	1.06497	0.302084	0.99989
ENSG00000118507	AKAP7	A kinase (PRKA) anchor protein 7 [Source:HGNC Symbol;Acc:377]	6	q23.2	1	131456806	131604675	4394	0.30933	6.05987	1.06463	0.302161	0.99989
ENSG00000155097	ATP6V1C1	ATPase, H+ transporting, lysosomal 42kDa, V1 subunit C1 [Source:HGNC Symbol;Acc:856]	8	q22.3	1	104033291	104085279	5851	-0.402785	4.88435	1.06335	0.302453	0.99989
ENSG00000248538			8	p23.1	1	9046521	9060364	875	-0.958107	4.28002	1.06328	0.302468	0.99989
ENSG00000088888	MAVS	mitochondrial antiviral signaling protein [Source:HGNC Symbol;Acc:29233]	20	p13	1	3827487	3849280	4240	-0.299462	5.26203	1.06232	0.302687	0.99989
ENSG00000116260	QSOX1	quiescin Q6 sulfhydryl oxidase 1 [Source:HGNC Symbol;Acc:9756]	1	q25.2	1	180123969	180173165	9311	-0.371528	3.96517	1.06193	0.302775	0.99989
ENSG00000188229	TUBB4B	tubulin, beta 4B class IVb [Source:HGNC Symbol;Acc:20771]	9	q34.3	1	140135665	140138159	2111	-0.251004	6.27898	1.05967	0.30329	0.99989
ENSG00000011105	TSPAN9	tetraspanin 9 [Source:HGNC Symbol;Acc:21640]	12	p13.33	1	3186521	3395730	5714	-0.280513	5.98581	1.05832	0.303599	0.99989
ENSG00000139722	VPS37B	vacuolar protein sorting 37 homolog B (S. cerevisiae) [Source:HGNC Symbol;Acc:25754]	12	q24.31	-1	123349882	123380991	5946	0.277444	4.84324	1.05805	0.303661	0.99989
ENSG00000108509	CAMTA2	calmodulin binding transcription activator 2 [Source:HGNC Symbol;Acc:18807]	17	p13.2	-1	4871287	4890960	6012	-0.35588	5.19542	1.05758	0.303768	0.99989
ENSG00000057608	GDI2	GDP dissociation inhibitor 2 [Source:HGNC Symbol;Acc:4227]	10	p15.1	-1	5807186	5884095	4033	-0.287575	6.896	1.05731	0.303828	0.99989
ENSG00000107223	EDF1	endothelial differentiation-related factor 1 [Source:HGNC Symbol;Acc:3164]	9	q34.3	-1	139756571	139760738	1200	0.202921	6.24463	1.05628	0.304065	0.99989
ENSG00000148362	C9orf142	chromosome 9 open reading frame 142 [Source:HGNC Symbol;Acc:27849]	9	q34.3	1	139886870	139888436	1367	0.429658	4.94137	1.05623	0.304077	0.99989
ENSG00000134697	GNL2	guanine nucleotide binding protein-like 2 (nucleolar) [Source:HGNC Symbol;Acc:29925]	1	p34.3	-1	38032417	38061536	5745	-0.46666	4.91732	1.05573	0.304192	0.99989
ENSG00000153006	SREK1IP1	SREK1-interacting protein 1 [Source:HGNC Symbol;Acc:26716]	5	q12.3	-1	64013971	64064512	7537	0.278842	4.52197	1.05459	0.304451	0.99989
ENSG00000141298	SSH2	slingshot protein phosphatase 2 [Source:HGNC Symbol;Acc:30580]	17	q11.2	-1	27952956	28257294	12608	-0.246556	5.44647	1.05415	0.304554	0.99989
ENSG00000109323	MANBA	mannosidase, beta A, lysosomal [Source:HGNC Symbol;Acc:6831]	4	q24	-1	103552660	103682151	8422	-0.322254	4.87614	1.05283	0.304857	0.99989
ENSG00000235257			3	p22.2	-1	37786923	37903271	6017	-0.261878	6.1194	1.05101	0.305274	0.99989
